# Supplementary material for: A Phyletically Rare Gene Promotes the Niche-specific Fitness of an E. coli Pathogen during Bacteremia
Source: PLoS Pathog. 2013 Feb 14;9(2):e1003175. doi: 10.1371/journal.ppat.1003175 (PMC3573123; doi:10.1371/journal.ppat.1003175)
Supplement: Table S7 — GC content for each gene in CFT073. (XLSX) [file ppat.1003175.s013.xlsx]

## Sheet: CFT073 GC RICHNESS
CFT073 locus	% GC	p value
:c3346944-3346795_hypothetical_protein_c3487_[Escherichia_coli_CFT073]	23.3333	6.58495e-07
:2210085-2210237_hypothetical_protein_c2407_[Escherichia_coli_CFT073]	23.5294	7.86064e-07
:c3901484-3901326_hypothetical_protein_c4110_[Escherichia_coli_CFT073]	23.8994	1.0943e-06
:c89303-89175_hypothetical_protein_c0094_[Escherichia_coli_CFT073]	24.8062	2.41797e-06
:c32031-31864_hypothetical_protein_c0038_[Escherichia_coli_CFT073]	25.5952	4.72022e-06
:c2398534-2398412_hypothetical_protein_c2565_[Escherichia_coli_CFT073]	26.0163	6.69154e-06
:3077579-3077707_hypothetical_protein_c3220_[Escherichia_coli_CFT073]	27.1318	1.64256e-05
:1726714-1727181_hypothetical_protein_c1892_[Escherichia_coli_CFT073]	27.1368	1.649e-05
:1197942-1198136_hypothetical_protein_c1249_[Escherichia_coli_CFT073]	27.1795	1.70539e-05
:1262535-1262681_hypothetical_protein_c1324_[Escherichia_coli_CFT073]	27.2109	1.74799e-05
:3148828-3148974_hypothetical_protein_c3303_[Escherichia_coli_CFT073]	27.2109	1.74799e-05
:4953819-4953944_hypothetical_protein_c5200_[Escherichia_coli_CFT073]	27.7778	2.71452e-05
:c129410-129267_hypothetical_protein_c0134_[Escherichia_coli_CFT073]	27.7778	2.71452e-05
:c1379370-1379245_hypothetical_protein_c1485_[Escherichia_coli_CFT073]	27.7778	2.71452e-05
:c2591326-2591198_hypothetical_protein_c2749_[Escherichia_coli_CFT073]	27.907	2.99677e-05
:c2395851-2394706_hypothetical_protein_c2561_[Escherichia_coli_CFT073]	27.9232	3.03414e-05
:3063044-3063934_hypothetical_protein_c3203_[Escherichia_coli_CFT073]	28.2828	3.98431e-05
:345925-346407_hypothetical_protein_c0364_[Escherichia_coli_CFT073]	28.3644	4.23591e-05
:c1344075-1343926_hypothetical_protein_c1430_[Escherichia_coli_CFT073]	28.6667	5.30548e-05
:c3522233-3521205_hypothetical_protein_c3693_[Escherichia_coli_CFT073]	28.7658	5.7085e-05
:4022319-4022813_hypothetical_protein_c4234_[Escherichia_coli_CFT073]	28.8889	6.24921e-05
:1726211-1726717_hypothetical_protein_c1891_[Escherichia_coli_CFT073]	28.9941	6.74919e-05
:330391-330552_hypothetical_protein_c0351_[Escherichia_coli_CFT073]	29.0123	6.83974e-05
:4569560-4569700_hypothetical_protein_c4805_[Escherichia_coli_CFT073]	29.078	7.1749e-05
:c167571-167431_hypothetical_protein_c0173_[Escherichia_coli_CFT073]	29.078	7.1749e-05
:4335337-4335492_hypothetical_protein_c4565_[Escherichia_coli_CFT073]	29.4872	9.63749e-05
:2204464-2205300_hypothetical_protein_c2400_[Escherichia_coli_CFT073]	29.6296	0.000106673
:c1247354-1247220_hypothetical_protein_c1304_[Escherichia_coli_CFT073]	29.6296	0.000106673
:c2393571-2392456_hypothetical_protein_c2559_[Escherichia_coli_CFT073]	29.7491	0.000116097
:346408-346938_hypothetical_protein_c0365_[Escherichia_coli_CFT073]	29.7552	0.000116597
:c934913-933882_hypothetical_protein_c0970_[Escherichia_coli_CFT073]	29.845	0.000124218
:87996-88118_hypothetical_protein_c0092_[Escherichia_coli_CFT073]	30.0813	0.000146574
:c130090-129968_hypothetical_protein_c0136_[Escherichia_coli_CFT073]	30.0813	0.000146574
:c2144402-2144274_hypothetical_protein_c2328_[Escherichia_coli_CFT073]	30.2326	0.000162803
:c3527425-3526190_hypothetical_protein_c3695_[Escherichia_coli_CFT073]	30.2589	0.000165796
:c3051884-3051753_hypothetical_protein_c3183_[Escherichia_coli_CFT073]	30.303	0.000170925
:c3511592-3511449_hypothetical_protein_c3685_[Escherichia_coli_CFT073]	30.5556	0.00020325
:c371751-371227_hypothetical_protein_c0392_[Escherichia_coli_CFT073]	30.6667	0.00021921
:c4928725-4928570_hypothetical_protein_c5161_[Escherichia_coli_CFT073]	30.7692	0.000234973
:3706622-3706978_DNA-binding_transcriptional_activator_TdcR_[Escherichia_coli_CFT073]	30.8123	0.000241907
:1725540-1725992_hypothetical_protein_c1890_[Escherichia_coli_CFT073]	30.9051	0.000257483
:c3521199-3520204_hypothetical_protein_c3692_[Escherichia_coli_CFT073]	30.9237	0.00026072
:c2212517-2211786_hypothetical_protein_c2409_[Escherichia_coli_CFT073]	31.0109	0.000276399
:c2399093-2397732_hypothetical_protein_c2564_[Escherichia_coli_CFT073]	31.0573	0.00028508
:c2137368-2137231_hypothetical_protein_c2320_[Escherichia_coli_CFT073]	31.1594	0.000305123
:c2781002-2780865_hypothetical_protein_c2918_[Escherichia_coli_CFT073]	31.1594	0.000305123
:75115-75537_hypothetical_protein_c0080_[Escherichia_coli_CFT073]	31.2057	0.000314623
:c2397735-2396866_glycosyl_transferase_[Escherichia_coli_CFT073]	31.2644	0.000327074
:c2400331-2399075_hypothetical_protein_c2566_[Escherichia_coli_CFT073]	31.3445	0.000344806
:792671-793024_hypothetical_protein_c0808_[Escherichia_coli_CFT073]	31.3559	0.000347416
:c3526136-3522336_hypothetical_protein_c3694_[Escherichia_coli_CFT073]	31.3602	0.000348385
:c4327087-4326878_hypothetical_protein_c4549_[Escherichia_coli_CFT073]	31.4286	0.000364383
:c1348057-1347632_hypothetical_protein_c1440_[Escherichia_coli_CFT073]	31.4554	0.000370842
:c298303-297875_hypothetical_protein_c0326_[Escherichia_coli_CFT073]	31.4685	0.000374042
:c1461159-1460986_hypothetical_protein_c1618_[Escherichia_coli_CFT073]	31.6092	0.000409967
:4407758-4407880_hypothetical_protein_c4647_[Escherichia_coli_CFT073]	31.7073	0.000436895
:167479-167607_hypothetical_protein_c0174_[Escherichia_coli_CFT073]	31.7829	0.000458759
:5130249-5130578_hypothetical_protein_c5385_[Escherichia_coli_CFT073]	31.8182	0.000469288
:c5095174-5095040_hypothetical_protein_c5351_[Escherichia_coli_CFT073]	31.8519	0.000479558
:4036080-4036226_hypothetical_protein_c4249_[Escherichia_coli_CFT073]	31.9728	0.000518187
:c970543-970388_hypothetical_protein_c1010_[Escherichia_coli_CFT073]	32.0513	0.000544779
:2195846-2197666_hypothetical_protein_c2393_[Escherichia_coli_CFT073]	32.0703	0.000551406
:2202763-2203686_hypothetical_protein_c2398_[Escherichia_coli_CFT073]	32.1429	0.000577395
:1959899-1960090_hypothetical_protein_c2119_[Escherichia_coli_CFT073]	32.2917	0.000634269
:c1130909-1129092_hypothetical_protein_c1166_[Escherichia_coli_CFT073]	32.4532	0.000701848
:c3601818-3601339_hypothetical_protein_c3767_[Escherichia_coli_CFT073]	32.5	0.000722607
:c4232274-4231291_putative_beta1,3-glucosyltransferase_[Escherichia_coli_CFT073]	32.5203	0.000731807
:376435-376560_hypothetical_protein_c0395_[Escherichia_coli_CFT073]	32.5397	0.000740668
:c3100254-3100129_hypothetical_protein_c3248_[Escherichia_coli_CFT073]	32.5397	0.000740668
:c3048101-3047835_GnsB_protein_[Escherichia_coli_CFT073]	32.5843	0.000761458
:c3527848-3527441_putative_glycerol-3-phosphate_cytidyltransferase_[Escherichia_coli_CFT073]	32.598	0.000767986
:c4036342-4036205_hypothetical_protein_c4250_[Escherichia_coli_CFT073]	32.6087	0.000773073
:c4821808-4821668_hypothetical_protein_c5043_[Escherichia_coli_CFT073]	32.6241	0.000780489
:3254915-3255067_hypothetical_protein_c3410_[Escherichia_coli_CFT073]	32.6797	0.000807791
:c2886236-2886084_hypothetical_protein_c3022_[Escherichia_coli_CFT073]	32.6797	0.000807791
:2211120-2211701_hypothetical_protein_c2408_[Escherichia_coli_CFT073]	32.8179	0.000879433
:c1184258-1183572_hypothetical_protein_c1233_[Escherichia_coli_CFT073]	32.8967	0.000922866
:5171375-5173048_hypothetical_protein_c5426_[Escherichia_coli_CFT073]	32.9749	0.000967953
:c4507406-4506558_hypothetical_protein_c4739_[Escherichia_coli_CFT073]	32.98	0.00097094
:128997-129293_hypothetical_protein_c0133_[Escherichia_coli_CFT073]	32.9966	0.000980822
:c4953954-4953577_hypothetical_protein_c5199_[Escherichia_coli_CFT073]	33.0688	0.0010247
:c2204327-2203818_hypothetical_protein_c2399_[Escherichia_coli_CFT073]	33.1373	0.001068
:2758106-2758675_Type_1_fimbriae_regulatory_protein_fimB_[Escherichia_coli_CFT073]	33.1579	0.00108138
:4355936-4356796_hypothetical_protein_c4594_[Escherichia_coli_CFT073]	33.2172	0.00112067
:1749411-1749551_hypothetical_protein_c1915_[Escherichia_coli_CFT073]	33.3333	0.00120144
:4342378-4342875_hypothetical_protein_c4581_[Escherichia_coli_CFT073]	33.3333	0.00120144
:c1488749-1488624_hypothetical_protein_c1653_[Escherichia_coli_CFT073]	33.3333	0.00120144
:c2206399-2206262_hypothetical_protein_c2402_[Escherichia_coli_CFT073]	33.3333	0.00120144
:c2215222-2214920_hypothetical_protein_c2415_[Escherichia_coli_CFT073]	33.3333	0.00120144
:c3049075-3048917_hypothetical_protein_c3178_[Escherichia_coli_CFT073]	33.3333	0.00120144
:c3958701-3958573_hypothetical_protein_c4174_[Escherichia_coli_CFT073]	33.3333	0.00120144
:c2208753-2207572_hypothetical_protein_c2405_[Escherichia_coli_CFT073]	33.4179	0.0012636
:74536-75108_hypothetical_protein_c0079_[Escherichia_coli_CFT073]	33.5079	0.00133287
:c2396920-2395838_glycosyl_transferase_[Escherichia_coli_CFT073]	33.518	0.00134091
:296575-297555_hypothetical_protein_c0325_[Escherichia_coli_CFT073]	33.6391	0.00144027
:c403076-402825_hypothetical_protein_c0419_[Escherichia_coli_CFT073]	33.7302	0.00151929
:4084297-4084470_hypothetical_protein_c4305_[Escherichia_coli_CFT073]	33.908	0.00168526
:4909805-4909978_hypothetical_protein_c5136_[Escherichia_coli_CFT073]	33.908	0.00168526
:c4506561-4506064_hypothetical_protein_c4738_[Escherichia_coli_CFT073]	33.9357	0.00171254
:c911421-910450_hypothetical_protein_c0933_[Escherichia_coli_CFT073]	33.9506	0.00172736
:c2088306-2088157_hypothetical_protein_c2266_[Escherichia_coli_CFT073]	34	0.00177738
:c4344927-4344784_hypothetical_protein_c4584_[Escherichia_coli_CFT073]	34.0278	0.0018061
:c4231245-4229992_Lipid_A-core,_surface_polymer_ligase_[Escherichia_coli_CFT073]	34.051	0.00183047
:c3472488-3472357_hypothetical_protein_c3632_[Escherichia_coli_CFT073]	34.0909	0.00187294
:1450837-1451607_hypothetical_protein_c1601_[Escherichia_coli_CFT073]	34.1115	0.00189527
:c3254876-3253995_antiterminator_[Escherichia_coli_CFT073]	34.127	0.00191213
:2314524-2315258_hypothetical_protein_c2471_[Escherichia_coli_CFT073]	34.1497	0.00193715
:74258-74494_hypothetical_protein_c0078_[Escherichia_coli_CFT073]	34.1772	0.00196795
:c2002124-2001324_hypothetical_protein_c2165_[Escherichia_coli_CFT073]	34.2072	0.00200202
:4756318-4756644_hypothetical_protein_c4977_[Escherichia_coli_CFT073]	34.2508	0.00205235
:c3422014-3421802_hypothetical_protein_c3572_[Escherichia_coli_CFT073]	34.2723	0.00207768
:4097033-4097638_hypothetical_protein_c4323_[Escherichia_coli_CFT073]	34.3234	0.00213895
:376320-376517_hypothetical_protein_c0394_[Escherichia_coli_CFT073]	34.3434	0.00216336
:c4334249-4333119_hypothetical_protein_c4561_[Escherichia_coli_CFT073]	34.3943	0.00222664
:1456159-1456425_hypothetical_protein_c1609_[Escherichia_coli_CFT073]	34.4569	0.00230673
:c1343800-1343465_hypothetical_protein_c1429_[Escherichia_coli_CFT073]	34.5238	0.00239518
:c4964853-4964200_hypothetical_protein_c5210_[Escherichia_coli_CFT073]	34.5566	0.00243963
:c4572455-4572213_hypothetical_protein_c4808_[Escherichia_coli_CFT073]	34.5679	0.00245517
:4021144-4022322_hypothetical_protein_c4233_[Escherichia_coli_CFT073]	34.6056	0.00250752
:4390171-4390245_tryptophanase_leader_peptide_[Escherichia_coli_CFT073]	34.6667	0.00259449
:c3601363-3600626_hypothetical_protein_c3766_[Escherichia_coli_CFT073]	34.6883	0.00262601
:c3052348-3052133_cold_shock-like_protein_cspB_[Escherichia_coli_CFT073]	34.7222	0.00267596
:2207072-2207284_hypothetical_protein_c2404_[Escherichia_coli_CFT073]	34.7418	0.00270519
:3418210-3418884_hemolysin_C_[Escherichia_coli_CFT073]	34.8148	0.00281689
:4827688-4827822_hypothetical_protein_c5051_[Escherichia_coli_CFT073]	34.8148	0.00281689
:c1118092-1117958_hypothetical_protein_c1158_[Escherichia_coli_CFT073]	34.8148	0.00281689
:c3958774-3958643_hypothetical_protein_c4175_[Escherichia_coli_CFT073]	34.8485	0.00286978
:3178342-3178467_hypothetical_protein_c3336_[Escherichia_coli_CFT073]	34.9206	0.00298613
:c2757358-2756729_Type_1_fimbriae_regulatory_protein_fimB_[Escherichia_coli_CFT073]	34.9206	0.00298613
:2327685-2328395_hypothetical_protein_c2486_[Escherichia_coli_CFT073]	35.0211	0.00315522
:4933881-4934117_hypothetical_protein_c5169_[Escherichia_coli_CFT073]	35.0211	0.00315522
:919531-920685_hypothetical_protein_c0946_[Escherichia_coli_CFT073]	35.1515	0.00338757
:3995303-3995464_hypothetical_protein_c4211_[Escherichia_coli_CFT073]	35.1852	0.00345001
:3020745-3021011_hypothetical_protein_c3145_[Escherichia_coli_CFT073]	35.206	0.0034891
:c2200567-2200253_hypothetical_protein_c2396_[Escherichia_coli_CFT073]	35.2381	0.0035502
:c4235107-4234112_lipopolysaccharide_1,2-glucosyltransferase_[Escherichia_coli_CFT073]	35.241	0.00355571
:1727294-1727437_hypothetical_protein_c1893_[Escherichia_coli_CFT073]	35.4167	0.00390794
:3329062-3329205_hypothetical_protein_c3466_[Escherichia_coli_CFT073]	35.4167	0.00390794
:933422-933898_hypothetical_protein_c0969_[Escherichia_coli_CFT073]	35.4298	0.00393542
:1173449-1173682_hypothetical_protein_c1221_[Escherichia_coli_CFT073]	35.4701	0.00402106
:1959224-1959589_hypothetical_protein_c2117_[Escherichia_coli_CFT073]	35.5191	0.00412747
:c1955238-1955194_phenylalanyl-tRNA_synthetase_operon_leader_peptide_[Escherichia_coli_CFT073]	35.5556	0.00420815
:3202573-3202704_hypothetical_protein_c3362_[Escherichia_coli_CFT073]	35.6061	0.00432233
:4521725-4521856_hypothetical_protein_c4756_[Escherichia_coli_CFT073]	35.6061	0.00432233
:c2394689-2393682_UDP-glucose_4-epimerase_[Escherichia_coli_CFT073]	35.6151	0.00434301
:1337824-1338042_hypothetical_protein_c1418_[Escherichia_coli_CFT073]	35.6164	0.00434613
:c1455965-1455792_hypothetical_protein_c1608_[Escherichia_coli_CFT073]	35.6322	0.00438247
:3707204-3707332_hypothetical_protein_c3878_[Escherichia_coli_CFT073]	35.6589	0.00444478
:3836886-3837014_hypothetical_protein_c4019_[Escherichia_coli_CFT073]	35.6589	0.00444478
:c3994907-3994350_putative_minor_fimbrial_subunit_[Escherichia_coli_CFT073]	35.6631	0.00445457
:c1224107-1223811_hypothetical_protein_c1271_[Escherichia_coli_CFT073]	35.6902	0.0045188
:271866-272603_hypothetical_protein_c0292_[Escherichia_coli_CFT073]	35.7724	0.00471812
:3646881-3647003_hypothetical_protein_c3811_[Escherichia_coli_CFT073]	35.7724	0.00471812
:1724601-1725203_hypothetical_protein_c1889_[Escherichia_coli_CFT073]	35.8209	0.00483958
:c2253879-2253361_hypothetical_protein_c2442_[Escherichia_coli_CFT073]	35.8382	0.00488342
:c2214867-2214571_hypothetical_protein_c2414_[Escherichia_coli_CFT073]	36.0269	0.00538677
:c3475325-3474585_hypothetical_protein_c3635_[Escherichia_coli_CFT073]	36.0324	0.00540196
:2160619-2160765_hypothetical_protein_c2347_[Escherichia_coli_CFT073]	36.0544	0.00546377
:c36891-36673_hypothetical_protein_c0042_[Escherichia_coli_CFT073]	36.0731	0.00551654
:c4234102-4233410_lipopolysaccharide_core_biosynthesis_protein_[Escherichia_coli_CFT073]	36.075	0.00552217
:c1184828-1184358_hypothetical_protein_c1234_[Escherichia_coli_CFT073]	36.0934	0.00557471
:1397313-1397456_hypothetical_protein_c1518_[Escherichia_coli_CFT073]	36.1111	0.00562569
:c1408603-1408460_hypothetical_protein_c1539_[Escherichia_coli_CFT073]	36.1111	0.00562569
:c3787944-3787807_hypothetical_protein_c3972_[Escherichia_coli_CFT073]	36.2319	0.00598494
:2212691-2213170_hypothetical_protein_c2410_[Escherichia_coli_CFT073]	36.25	0.00604054
:c1338659-1338498_hypothetical_protein_c1420_[Escherichia_coli_CFT073]	36.4198	0.00658425
:c4621245-4621117_hypothetical_protein_c4860_[Escherichia_coli_CFT073]	36.4341	0.00663215
:4756687-4757136_hypothetical_protein_c4978_[Escherichia_coli_CFT073]	36.4444	0.00666683
:2670902-2671024_hypothetical_protein_c2814_[Escherichia_coli_CFT073]	36.5854	0.00715594
:2206594-2207082_hypothetical_protein_c2403_[Escherichia_coli_CFT073]	36.6053	0.00722769
:1337028-1337210_hypothetical_protein_c1416_[Escherichia_coli_CFT073]	36.612	0.00725194
:c2214498-2214256_hypothetical_protein_c2413_[Escherichia_coli_CFT073]	36.6255	0.00730096
:1112432-1112641_hypothetical_protein_c1152_[Escherichia_coli_CFT073]	36.6667	0.00745229
:294176-296482_putative_exopolygalacturonate_lyase_[Escherichia_coli_CFT073]	36.671	0.00746839
:c409858-409190_hypothetical_protein_c0425_[Escherichia_coli_CFT073]	36.7713	0.00784957
:c4205121-4204954_hypothetical_protein_c4422_[Escherichia_coli_CFT073]	36.9048	0.00838327
:c299116-298646_hypothetical_protein_c0327_[Escherichia_coli_CFT073]	36.9427	0.00854057
:1063996-1064214_hypothetical_protein_c1094_[Escherichia_coli_CFT073]	36.9863	0.00872479
:c4931556-4930681_hypothetical_protein_c5164_[Escherichia_coli_CFT073]	36.9863	0.00872479
:4821518-4821652_hypothetical_protein_c5042_[Escherichia_coli_CFT073]	37.037	0.00894339
:c1452897-1452493_hypothetical_protein_c1603_[Escherichia_coli_CFT073]	37.037	0.00894339
:c2316987-2316562_hypothetical_protein_c2475_[Escherichia_coli_CFT073]	37.0892	0.00917314
:c2163061-2162264_putative_transcriptional_regulator_YbcM_[Escherichia_coli_CFT073]	37.0927	0.00918887
:c2803555-2803397_hypothetical_protein_c2938_[Escherichia_coli_CFT073]	37.1069	0.00925234
:1174032-1174163_hypothetical_protein_c1222_[Escherichia_coli_CFT073]	37.1212	0.00931667
:c2695835-2695704_hypothetical_protein_c2837_[Escherichia_coli_CFT073]	37.1212	0.00931667
:c4233384-4232356_UDP-galactose:(galactosyl)_LPS_alpha1,2-galactosyltransferase_[Escherichia_coli_CFT073]	37.1234	0.00932664
:c4520043-4519783_hypothetical_protein_c4753_[Escherichia_coli_CFT073]	37.1648	0.00951504
:c679657-678719_putative_transcriptional_regulator_YbdO_[Escherichia_coli_CFT073]	37.1672	0.0095263
:c1538113-1537985_hypothetical_protein_c1702_[Escherichia_coli_CFT073]	37.2093	0.00972183
:3960843-3960995_hypothetical_protein_c4178_[Escherichia_coli_CFT073]	37.2549	0.00993755
:c3925446-3925270_hypothetical_protein_c4140_[Escherichia_coli_CFT073]	37.2881	0.0100974
:c2814519-2814394_hypothetical_protein_c2949_[Escherichia_coli_CFT073]	37.3016	0.0101627
:c1614590-1614390_hypothetical_protein_c1781_[Escherichia_coli_CFT073]	37.3134	0.0102206
:c3979577-3979431_hypothetical_protein_c4195_[Escherichia_coli_CFT073]	37.415	0.0107282
:1516444-1516662_hypothetical_protein_c1683_[Escherichia_coli_CFT073]	37.4429	0.0108718
:c2756411-2755791_hypothetical_protein_c2896_[Escherichia_coli_CFT073]	37.5201	0.011277
:c3473413-3472475_hypothetical_protein_c3633_[Escherichia_coli_CFT073]	37.5932	0.0116724
:c3963724-3963539_hypothetical_protein_c4182_[Escherichia_coli_CFT073]	37.6344	0.0119008
:c1652837-1652469_hypothetical_protein_c1820_[Escherichia_coli_CFT073]	37.6694	0.0120976
:c3252383-3251208_Beta-cystathionase_[Escherichia_coli_CFT073]	37.6701	0.0121015
:3208745-3208882_hypothetical_protein_c3369_[Escherichia_coli_CFT073]	37.6812	0.0121646
:c1262944-1262807_hypothetical_protein_c1325_[Escherichia_coli_CFT073]	37.6812	0.0121646
:c2456936-2455722_hypothetical_protein_c2610_[Escherichia_coli_CFT073]	37.6955	0.0122463
:1220895-1221437_hypothetical_protein_c1270_[Escherichia_coli_CFT073]	37.7532	0.012581
:c4074865-4074686_hypothetical_protein_c4294_[Escherichia_coli_CFT073]	37.7778	0.0127257
:5128222-5128935_hypothetical_protein_c5382_[Escherichia_coli_CFT073]	37.8151	0.0129485
:4147098-4147253_hypothetical_protein_c4362_[Escherichia_coli_CFT073]	37.8205	0.0129809
:292732-294246_putative_oligogalacturonide_transporter_[Escherichia_coli_CFT073]	37.8218	0.0129886
:1125933-1127423_hypothetical_protein_c1164_[Escherichia_coli_CFT073]	37.827	0.0130198
:4342016-4342237_hypothetical_protein_c4580_[Escherichia_coli_CFT073]	37.8378	0.0130857
:c4236140-4235124_lipopolysaccharide_1,3-galactosyltransferase_[Escherichia_coli_CFT073]	37.8564	0.0131989
:3416947-3417189_hypothetical_protein_c3568_[Escherichia_coli_CFT073]	37.8601	0.0132212
:c779362-779120_hypothetical_protein_c0795_[Escherichia_coli_CFT073]	37.8601	0.0132212
:1338495-1338626_hypothetical_protein_c1419_[Escherichia_coli_CFT073]	37.8788	0.0133361
:c1769632-1769435_hypothetical_protein_c1929_[Escherichia_coli_CFT073]	37.8788	0.0133361
:c1467778-1467497_hypothetical_protein_c1630_[Escherichia_coli_CFT073]	37.9433	0.0137388
:c1716094-1715945_hypothetical_protein_c1881_[Escherichia_coli_CFT073]	38	0.0141019
:2777081-2777356_lipoprotein_ypdI_[Escherichia_coli_CFT073]	38.0435	0.0143856
:c3429330-3428779_PapX_protein_[Escherichia_coli_CFT073]	38.0435	0.0143856
:291188-291988_gluconate_5-dehydrogenase_[Escherichia_coli_CFT073]	38.0774	0.0146104
:c912360-911434_hypothetical_protein_c0934_[Escherichia_coli_CFT073]	38.0798	0.0146266
:c2392478-2391027_mannose-1-phosphate_guanylyltransferase_[Escherichia_coli_CFT073]	38.0854	0.0146639
:1719505-1720740_hypothetical_protein_c1885_[Escherichia_coli_CFT073]	38.1068	0.0148077
:3443368-3443826_hypothetical_protein_c3601_[Escherichia_coli_CFT073]	38.1264	0.0149402
:1959607-1959918_hypothetical_protein_c2118_[Escherichia_coli_CFT073]	38.141	0.0150402
:c1412387-1411830_hypothetical_protein_c1545_[Escherichia_coli_CFT073]	38.172	0.0152536
:c3624022-3623837_hypothetical_protein_c3790_[Escherichia_coli_CFT073]	38.172	0.0152536
:c5181417-5181253_hypothetical_protein_c5434_[Escherichia_coli_CFT073]	38.1818	0.0153214
:c3998846-3998067_chaperone_protein_fimC_[Escherichia_coli_CFT073]	38.2051	0.0154842
:1395766-1395888_hypothetical_protein_c1515_[Escherichia_coli_CFT073]	38.2114	0.0155281
:4738830-4738952_hypothetical_protein_c4965_[Escherichia_coli_CFT073]	38.2114	0.0155281
:c1409177-1408809_putative_single-stranded_DNA_binding_protein_of_prophage_[Escherichia_coli_CFT073]	38.2114	0.0155281
:c793214-793092_hypothetical_protein_c0809_[Escherichia_coli_CFT073]	38.2114	0.0155281
:c2747767-2747237_hypothetical_protein_c2893_[Escherichia_coli_CFT073]	38.2298	0.0156577
:c3479522-3478605_N-acetylneuraminate_lyase_[Escherichia_coli_CFT073]	38.2353	0.0156969
:1388123-1388284_hypothetical_protein_c1504_[Escherichia_coli_CFT073]	38.2716	0.0159564
:3588718-3589200_hypothetical_protein_c3755_[Escherichia_coli_CFT073]	38.3023	0.0161784
:5018204-5018605_hypothetical_protein_c5265_[Escherichia_coli_CFT073]	38.3085	0.0162235
:c3528519-3527848_KpsT_protein_[Escherichia_coli_CFT073]	38.3929	0.0168496
:32101-32238_hypothetical_protein_c0039_[Escherichia_coli_CFT073]	38.4058	0.0169474
:3739466-3739603_hypothetical_protein_c3915_[Escherichia_coli_CFT073]	38.4058	0.0169474
:436133-436408_hypothetical_protein_c0449_[Escherichia_coli_CFT073]	38.4058	0.0169474
:c836026-835889_hypothetical_protein_c0859_[Escherichia_coli_CFT073]	38.4058	0.0169474
:2175737-2176360_colanic_acid_capsular_biosynthesis_activation_protein_A_[Escherichia_coli_CFT073]	38.4615	0.0173742
:c460570-460376_hypothetical_protein_c0471_[Escherichia_coli_CFT073]	38.4615	0.0173742
:c3993589-3992579_putative_fimbrial_adhesin_[Escherichia_coli_CFT073]	38.4768	0.0174923
:130380-130670_hypothetical_protein_c0137_[Escherichia_coli_CFT073]	38.488	0.0175798
:2994127-2994261_hypothetical_protein_c3113_[Escherichia_coli_CFT073]	38.5185	0.01782
:c736528-736394_hypothetical_protein_c0754_[Escherichia_coli_CFT073]	38.5185	0.01782
:1587301-1587453_hypothetical_protein_c1752_[Escherichia_coli_CFT073]	38.5621	0.0181674
:1196018-1196569_putative_regulatory_protein_[Escherichia_coli_CFT073]	38.587	0.0183683
:c1305255-1305085_hypothetical_protein_c1375_[Escherichia_coli_CFT073]	38.5965	0.0184458
:5154615-5154746_hypothetical_protein_c5411_[Escherichia_coli_CFT073]	38.6364	0.018773
:c2479086-2478052_hypothetical_protein_c2635_[Escherichia_coli_CFT073]	38.6473	0.018864
:3018710-3019630_hypothetical_protein_c3143_[Escherichia_coli_CFT073]	38.6536	0.0189163
:4158236-4158385_hypothetical_protein_c4374_[Escherichia_coli_CFT073]	38.6667	0.019025
:c2482272-2481598_fimbrial_chaperone_yehC_[Escherichia_coli_CFT073]	38.6667	0.019025
:c4966498-4965038_hypothetical_protein_c5211_[Escherichia_coli_CFT073]	38.6721	0.0190708
:c5135429-5135022_hypothetical_protein_c5390_[Escherichia_coli_CFT073]	38.7255	0.0195223
:c3489692-3489471_hypothetical_protein_c3653_[Escherichia_coli_CFT073]	38.7387	0.0196358
:c3659990-3659862_hypothetical_protein_c3826_[Escherichia_coli_CFT073]	38.7597	0.0198164
:289986-291158_putative_oligogalacturonide_lyase_[Escherichia_coli_CFT073]	38.7894	0.0200753
:c133382-133200_hypothetical_protein_c0141_[Escherichia_coli_CFT073]	38.7978	0.0201488
:c3994405-3993608_putative_fimbrial_chaperone_[Escherichia_coli_CFT073]	38.8471	0.0205856
:2193014-2193646_hypothetical_protein_c2391_[Escherichia_coli_CFT073]	38.8626	0.020724
:2027618-2029093_hypothetical_protein_c2190_[Escherichia_coli_CFT073]	38.8889	0.0209619
:348228-348353_hypothetical_protein_c0368_[Escherichia_coli_CFT073]	38.8889	0.0209619
:c2936023-2935880_hypothetical_protein_c3063_[Escherichia_coli_CFT073]	38.8889	0.0209619
:c3148809-3147766_hypothetical_protein_c3302_[Escherichia_coli_CFT073]	38.8889	0.0209619
:c347158-346889_hypothetical_protein_c0366_[Escherichia_coli_CFT073]	38.8889	0.0209619
:c2459617-2459285_hypothetical_protein_c2613_[Escherichia_coli_CFT073]	39.039	0.0223631
:c1112720-1112529_hypothetical_protein_c1153_[Escherichia_coli_CFT073]	39.0625	0.022589
:c3431761-3431222_PapE_protein_[Escherichia_coli_CFT073]	39.0741	0.0227012
:c4942999-4942460_PapE_protein_[Escherichia_coli_CFT073]	39.0741	0.0227012
:425592-425834_hypothetical_protein_c0438_[Escherichia_coli_CFT073]	39.0947	0.0229017
:c1766477-1765305_hypothetical_protein_c1926_[Escherichia_coli_CFT073]	39.1304	0.0232541
:c1769359-1768598_transcriptional_regulator_YdeO_[Escherichia_coli_CFT073]	39.2388	0.0243495
:c4088341-4088156_hypothetical_protein_c4310_[Escherichia_coli_CFT073]	39.2473	0.0244368
:c4652915-4652055_nucleoside-specific_channel-forming_protein_tsx_[Escherichia_coli_CFT073]	39.2567	0.0245337
:973317-973451_hypothetical_protein_c1013_[Escherichia_coli_CFT073]	39.2593	0.0245605
:2257346-2258062_hypothetical_protein_c2445_[Escherichia_coli_CFT073]	39.3305	0.0253095
:c3066517-3065702_hypothetical_protein_c3206_[Escherichia_coli_CFT073]	39.3382	0.0253915
:2300422-2300619_hypothetical_protein_c2465_[Escherichia_coli_CFT073]	39.3939	0.0259916
:91727-91858_hypothetical_protein_c0097_[Escherichia_coli_CFT073]	39.3939	0.0259916
:c3077459-3077328_hypothetical_protein_c3219_[Escherichia_coli_CFT073]	39.3939	0.0259916
:c3472081-3471917_hypothetical_protein_c3631_[Escherichia_coli_CFT073]	39.3939	0.0259916
:c4847689-4847558_hypothetical_protein_c5073_[Escherichia_coli_CFT073]	39.3939	0.0259916
:2136546-2136692_hypothetical_protein_c2317_[Escherichia_coli_CFT073]	39.4558	0.0266718
:3088716-3088862_hypothetical_protein_c3233_[Escherichia_coli_CFT073]	39.4558	0.0266718
:c2136695-2136549_hypothetical_protein_c2318_[Escherichia_coli_CFT073]	39.4558	0.0266718
:c3382009-3381863_hypothetical_protein_c3525_[Escherichia_coli_CFT073]	39.4558	0.0266718
:c4576869-4576723_hypothetical_protein_c4814_[Escherichia_coli_CFT073]	39.4558	0.0266718
:1464217-1464444_hypothetical_protein_c1624_[Escherichia_coli_CFT073]	39.4737	0.0268714
:4205257-4205940_hypothetical_protein_c4423_[Escherichia_coli_CFT073]	39.4737	0.0268714
:1445744-1446034_hypothetical_protein_c1593_[Escherichia_coli_CFT073]	39.5189	0.0273812
:2333172-2333930_hypothetical_protein_c2493_[Escherichia_coli_CFT073]	39.5257	0.0274585
:3424183-3425619_hemolysin_D_[Escherichia_coli_CFT073]	39.5268	0.027471
:c1644312-1644184_hypothetical_protein_c1813_[Escherichia_coli_CFT073]	39.5349	0.0275634
:c4520360-4520103_hypothetical_protein_c4754_[Escherichia_coli_CFT073]	39.5349	0.0275634
:3000299-3000346_Phe_leader_peptide_[Escherichia_coli_CFT073]	39.5833	0.0281216
:c2189790-2188432_putative_sensor-like_histidine_kinase_yedV_[Escherichia_coli_CFT073]	39.5879	0.0281751
:1086808-1086981_GnsB_protein_[Escherichia_coli_CFT073]	39.6552	0.0289667
:c1086996-1086823_hypothetical_protein_c1126_[Escherichia_coli_CFT073]	39.6552	0.0289667
:2766143-2766757_DNA-binding_transcriptional_activator_EvgA_[Escherichia_coli_CFT073]	39.6748	0.0292012
:c4519746-4519621_hypothetical_protein_c4752_[Escherichia_coli_CFT073]	39.6825	0.0292941
:1246669-1246809_hypothetical_protein_c1303_[Escherichia_coli_CFT073]	39.7163	0.0297024
:4084409-4084939_putative_transcriptional_regulator_YhiF_[Escherichia_coli_CFT073]	39.7363	0.0299469
:1381706-1381939_hypothetical_protein_c1492_[Escherichia_coli_CFT073]	39.7436	0.0300356
:c1241404-1241249_hypothetical_protein_c1294_[Escherichia_coli_CFT073]	39.7436	0.0300356
:c291114-290959_hypothetical_protein_c0320_[Escherichia_coli_CFT073]	39.7436	0.0300356
:c289744-289106_hypothetical_protein_c0318_[Escherichia_coli_CFT073]	39.7496	0.0301096
:c2300730-2300482_hypothetical_protein_c2466_[Escherichia_coli_CFT073]	39.759	0.0302257
:c386456-385866_hypothetical_protein_c0405_[Escherichia_coli_CFT073]	39.7631	0.030276
:c1423221-1422880_lambdoid_prophage_DLP12_Bor-like_protein_[Escherichia_coli_CFT073]	39.7661	0.0303127
:c2265049-2264537_hypothetical_protein_c2450_[Escherichia_coli_CFT073]	39.7661	0.0303127
:4277483-4277713_hypothetical_protein_c4493_[Escherichia_coli_CFT073]	39.8268	0.0310718
:475046-475168_hypothetical_protein_c0488_[Escherichia_coli_CFT073]	39.8374	0.0312053
:c295303-295181_hypothetical_protein_c0324_[Escherichia_coli_CFT073]	39.8374	0.0312053
:918529-919311_hypothetical_protein_c0945_[Escherichia_coli_CFT073]	39.8467	0.0313239
:c4521046-4520357_hypothetical_protein_c4755_[Escherichia_coli_CFT073]	39.8551	0.0314299
:4784370-4784522_hypothetical_protein_c5008_[Escherichia_coli_CFT073]	39.8693	0.0316113
:4821812-4821964_hypothetical_protein_c5044_[Escherichia_coli_CFT073]	39.8693	0.0316113
:c5167150-5165381_putative_restriction_modification_enzyme_S_subunit_[Escherichia_coli_CFT073]	39.9435	0.0325735
:c246405-245650_hydroxyacylglutathione_hydrolase_[Escherichia_coli_CFT073]	39.9471	0.0326206
:4617184-4617333_hypothetical_protein_c4854_[Escherichia_coli_CFT073]	40	0.0333219
:561140-561304_hypothetical_protein_c0583_[Escherichia_coli_CFT073]	40	0.0333219
:968964-969098_hypothetical_protein_c1008_[Escherichia_coli_CFT073]	40	0.0333219
:16953-17714_hypothetical_protein_c0021_[Escherichia_coli_CFT073]	40.0262	0.0336744
:c2455034-2452887_hypothetical_protein_c2608_[Escherichia_coli_CFT073]	40.0838	0.0344581
:c3474581-3473463_N-acetylneuraminic_acid_mutarotase_[Escherichia_coli_CFT073]	40.1251	0.0350298
:2469295-2469441_hypothetical_protein_c2624_[Escherichia_coli_CFT073]	40.1361	0.0351825
:2554196-2554327_hypothetical_protein_c2705_[Escherichia_coli_CFT073]	40.1515	0.0353993
:3422041-3424164_hemolysin_B_[Escherichia_coli_CFT073]	40.1601	0.0355197
:c4327731-4327162_hypothetical_protein_c4550_[Escherichia_coli_CFT073]	40.1754	0.0357368
:c3995325-3994873_putative_minor_fimbrial_subunit_[Escherichia_coli_CFT073]	40.1766	0.0357532
:468506-469174_putative_DNA-binding_transcriptional_regulator_[Escherichia_coli_CFT073]	40.2093	0.0362185
:2591105-2591278_hypothetical_protein_c2748_[Escherichia_coli_CFT073]	40.2299	0.0365147
:c3476150-3475341_hypothetical_protein_c3636_[Escherichia_coli_CFT073]	40.2469	0.0367609
:c3048898-3048683_cold_shock-like_protein_cspI_[Escherichia_coli_CFT073]	40.2778	0.0372105
:2877798-2878142_hypothetical_protein_c3016_[Escherichia_coli_CFT073]	40.2899	0.0373876
:3509760-3510677_hypothetical_protein_c3682_[Escherichia_coli_CFT073]	40.305	0.0376109
:c1699988-1699860_hypothetical_protein_c1861_[Escherichia_coli_CFT073]	40.3101	0.0376858
:c3674706-3674536_hypothetical_protein_c3841_[Escherichia_coli_CFT073]	40.3509	0.0382932
:301731-302651_putative_ribokinase_[Escherichia_coli_CFT073]	40.3909	0.0388965
:c4095049-4094711_acid-resistance_protein_[Escherichia_coli_CFT073]	40.413	0.0392331
:c177958-177776_hypothetical_protein_c0184_[Escherichia_coli_CFT073]	40.4372	0.0396041
:4467850-4467975_hypothetical_protein_c4703_[Escherichia_coli_CFT073]	40.4762	0.040209
:816436-816645_hypothetical_protein_c0839_[Escherichia_coli_CFT073]	40.4762	0.040209
:835011-835052_putative_methyltransferase_[Escherichia_coli_CFT073]	40.4762	0.040209
:c4242415-4242248_50S_ribosomal_protein_L33_[Escherichia_coli_CFT073]	40.4762	0.040209
:c5066835-5066710_hypothetical_protein_c5324_[Escherichia_coli_CFT073]	40.4762	0.040209
:843388-844128_hypothetical_protein_c0870_[Escherichia_coli_CFT073]	40.4858	0.0403596
:c4821696-4819876_putative_transport_sensor_protein_[Escherichia_coli_CFT073]	40.5272	0.0410106
:c555359-554985_hypothetical_protein_c0579_[Escherichia_coli_CFT073]	40.5333	0.0411081
:3547885-3548133_hypothetical_protein_c3714_[Escherichia_coli_CFT073]	40.5622	0.0415693
:c262984-262736_hypothetical_protein_c0281_[Escherichia_coli_CFT073]	40.5622	0.0415693
:3827694-3827858_hypothetical_protein_c4010_[Escherichia_coli_CFT073]	40.6061	0.0422759
:3122041-3122232_hypothetical_protein_c3275_[Escherichia_coli_CFT073]	40.625	0.0425844
:c1559147-1558641_hypothetical_protein_c1723_[Escherichia_coli_CFT073]	40.6312	0.0426852
:c1411833-1411081_hypothetical_protein_c1544_[Escherichia_coli_CFT073]	40.6375	0.0427882
:3409205-3409423_hypothetical_protein_c3558_[Escherichia_coli_CFT073]	40.6393	0.042818
:c3478571-3477696_N-acetylmannosamine_kinase_[Escherichia_coli_CFT073]	40.6393	0.042818
:1418302-1418643_hypothetical_protein_c1556_[Escherichia_coli_CFT073]	40.6433	0.0428838
:4184545-4184667_hypothetical_protein_c4401_[Escherichia_coli_CFT073]	40.6504	0.0430011
:c335291-335169_hypothetical_protein_c0359_[Escherichia_coli_CFT073]	40.6504	0.0430011
:5799-5948_hypothetical_protein_c0006_[Escherichia_coli_CFT073]	40.6667	0.0432695
:c554971-554741_hemolysin_expression-modulating_protein_[Escherichia_coli_CFT073]	40.6926	0.043701
:5044493-5045212_hypothetical_protein_c5304_[Escherichia_coli_CFT073]	40.6944	0.0437311
:4601742-4602053_hypothetical_protein_c4837_[Escherichia_coli_CFT073]	40.7051	0.0439097
:c1378072-1377761_hypothetical_protein_c1481_[Escherichia_coli_CFT073]	40.7051	0.0439097
:c2455722-2455006_hypothetical_protein_c2609_[Escherichia_coli_CFT073]	40.7252	0.0442476
:3760536-3760670_hypothetical_protein_c3935_[Escherichia_coli_CFT073]	40.7407	0.0445093
:c4707492-4707331_hypothetical_protein_c4934_[Escherichia_coli_CFT073]	40.7407	0.0445093
:2766762-2770355_hybrid_sensory_histidine_kinase_in_two-component_regulatory_system_with_EvgA_[Escherichia_coli_CFT073]	40.7624	0.0448769
:c4527005-4526160_hypothetical_protein_c4760_[Escherichia_coli_CFT073]	40.7801	0.0451804
:c4656205-4654652_hypothetical_protein_c4896_[Escherichia_coli_CFT073]	40.7979	0.0454862
:4083123-4083296_hypothetical_protein_c4303_[Escherichia_coli_CFT073]	40.8046	0.045601
:2045745-2046104_hypothetical_protein_c2214_[Escherichia_coli_CFT073]	40.8333	0.0460992
:1644038-1644436_hypothetical_protein_c1812_[Escherichia_coli_CFT073]	40.8521	0.0464275
:c4451213-4451028_hypothetical_protein_c4689_[Escherichia_coli_CFT073]	40.8602	0.0465693
:5131079-5131210_hypothetical_protein_c5386_[Escherichia_coli_CFT073]	40.9091	0.0474337
:3418896-3421970_hemolysin_A_[Escherichia_coli_CFT073]	40.9106	0.04746
:2495373-2495543_hypothetical_protein_c2648_[Escherichia_coli_CFT073]	40.9357	0.0479092
:3628503-3629552_hypothetical_protein_c3794_[Escherichia_coli_CFT073]	40.9524	0.04821
:c1334130-1333711_hypothetical_protein_c1410_[Escherichia_coli_CFT073]	40.9524	0.04821
:c388978-388835_hypothetical_protein_c0408_[Escherichia_coli_CFT073]	40.9722	0.0485692
:c4103363-4102635_putative_transcriptional_regulator_YhiW_[Escherichia_coli_CFT073]	41.0151	0.0493526
:c264206-263700_hypothetical_protein_c0283_[Escherichia_coli_CFT073]	41.0256	0.049547
:c1973291-1972449_DNA-binding_transcriptional_regulator_ChbR_[Escherichia_coli_CFT073]	41.0439	0.0498846
:5098583-5099113_hypothetical_protein_c5356_[Escherichia_coli_CFT073]	41.0546	0.0500838
:1801647-1802345_hypothetical_protein_c1960_[Escherichia_coli_CFT073]	41.0587	0.0501591
:3844362-3844568_hypothetical_protein_c4029_[Escherichia_coli_CFT073]	41.0628	0.0502364
:c1695053-1694925_hypothetical_protein_c1855_[Escherichia_coli_CFT073]	41.0853	0.0506569
:c5105238-5105110_hypothetical_protein_c5361_[Escherichia_coli_CFT073]	41.0853	0.0506569
:c4104556-4103732_DNA-binding_transcriptional_regulator_GadX_[Escherichia_coli_CFT073]	41.0909	0.0507629
:5217942-5218352_hypothetical_protein_c5476_[Escherichia_coli_CFT073]	41.1192	0.0512976
:893873-896221_hypothetical_protein_c0918_[Escherichia_coli_CFT073]	41.1239	0.0513861
:3178481-3179083_hypothetical_protein_c3337_[Escherichia_coli_CFT073]	41.1277	0.0514585
:1172485-1173561_phospho-2-dehydro-3-deoxyheptonate_aldolase_[Escherichia_coli_CFT073]	41.1328	0.0515552
:c1332448-1332155_division_inhibition_protein_dicB_[Escherichia_coli_CFT073]	41.1565	0.0520078
:3442798-3443358_hypothetical_protein_c3600_[Escherichia_coli_CFT073]	41.1765	0.0523926
:c2075023-2074871_hypothetical_protein_c2248_[Escherichia_coli_CFT073]	41.1765	0.0523926
:4791261-4791476_putative_stress-response_protein_[Escherichia_coli_CFT073]	41.2037	0.05292
:c4948799-4948203_PapA_protein_[Escherichia_coli_CFT073]	41.206	0.0529652
:1331937-1332482_hypothetical_protein_c1403_[Escherichia_coli_CFT073]	41.2088	0.053019
:c4270065-4268467_putative_transcriptional_antiterminator_[Escherichia_coli_CFT073]	41.2133	0.053106
:1409774-1410355_putative_superinfection_exclusion_protein_B_of_prophage_[Escherichia_coli_CFT073]	41.2371	0.0535727
:c1935549-1935373_hypothetical_protein_c2092_[Escherichia_coli_CFT073]	41.2429	0.0536871
:c2482895-2482353_hypothetical_protein_c2638_[Escherichia_coli_CFT073]	41.2523	0.0538715
:3382329-3382454_hypothetical_protein_c3526_[Escherichia_coli_CFT073]	41.2698	0.0542182
:c1375265-1375014_hypothetical_protein_c1478_[Escherichia_coli_CFT073]	41.2698	0.0542182
:c3065718-3065329_hypothetical_protein_c3205_[Escherichia_coli_CFT073]	41.2821	0.0544607
:c628865-628200_hypothetical_protein_c0651_[Escherichia_coli_CFT073]	41.2913	0.0546447
:c1409560-1409360_lambda_ant-restriction_protein_[Escherichia_coli_CFT073]	41.2935	0.0546894
:c4535517-4535368_hypothetical_protein_c4770_[Escherichia_coli_CFT073]	41.3333	0.0554882
:c3251205-3250609_phosphosugar_isomerase_[Escherichia_coli_CFT073]	41.3735	0.0563043
:c2765727-2764564_multidrug_resistance_protein_K_[Escherichia_coli_CFT073]	41.4089	0.0570308
:4840930-4841127_hypothetical_protein_c5065_[Escherichia_coli_CFT073]	41.4141	0.0571383
:c1372494-1371829_hypothetical_protein_c1474_[Escherichia_coli_CFT073]	41.4414	0.0577044
:c5090251-5089697_hypothetical_protein_c5346_[Escherichia_coli_CFT073]	41.4414	0.0577044
:c1947988-1947275_hypothetical_protein_c2103_[Escherichia_coli_CFT073]	41.4566	0.0580203
:2368950-2369072_hypothetical_protein_c2535_[Escherichia_coli_CFT073]	41.4634	0.0581632
:2331944-2333158_putative_carbohydrate_kinase_[Escherichia_coli_CFT073]	41.4815	0.0585426
:c3023871-3023590_hypothetical_protein_c3149_[Escherichia_coli_CFT073]	41.4894	0.0587087
:c793378-793232_hypothetical_protein_c0810_[Escherichia_coli_CFT073]	41.4966	0.0588616
:4331703-4331861_hypothetical_protein_c4560_[Escherichia_coli_CFT073]	41.5094	0.0591335
:c3460261-3456362_secreted_auto_transporter_toxin_[Escherichia_coli_CFT073]	41.5128	0.0592054
:4930708-4930890_hypothetical_protein_c5165_[Escherichia_coli_CFT073]	41.5301	0.0595724
:c161524-160235_putative_fimbrial-like_adhesin_protein_[Escherichia_coli_CFT073]	41.5504	0.0600076
:2502919-2503392_lipoprotein_yehR_[Escherichia_coli_CFT073]	41.5612	0.0602396
:c4267952-4267638_PTS_system,_fructose-like-2_IIB_component_1_[Escherichia_coli_CFT073]	41.5873	0.0608041
:c3833573-3832584_ribose_ABC_transporter_permease_[Escherichia_coli_CFT073]	41.6162	0.0614326
:816345-816500_hypothetical_protein_c0838_[Escherichia_coli_CFT073]	41.6667	0.0625446
:c1059531-1059400_hypothetical_protein_c1089_[Escherichia_coli_CFT073]	41.6667	0.0625446
:c1801448-1801137_PTS_system,_cellobiose-specific_IIB_component_[Escherichia_coli_CFT073]	41.6667	0.0625446
:4569648-4571120_hypothetical_protein_c4806_[Escherichia_coli_CFT073]	41.6836	0.0629218
:c2253386-2252766_hypothetical_protein_c2441_[Escherichia_coli_CFT073]	41.7069	0.0634422
:c4896465-4895704_putative_regulatory_protein_adiY_[Escherichia_coli_CFT073]	41.7323	0.0640127
:1464597-1464965_hypothetical_protein_c1625_[Escherichia_coli_CFT073]	41.7344	0.0640609
:4908980-4909252_hypothetical_protein_c5134_[Escherichia_coli_CFT073]	41.7582	0.0646009
:c1246695-1246045_DNA-binding_transcriptional_regulator_CsgD_[Escherichia_coli_CFT073]	41.7819	0.0651399
:3510482-3510694_hypothetical_protein_c3683_[Escherichia_coli_CFT073]	41.784	0.0651895
:3886957-3887772_general_secretion_pathway_protein_C_[Escherichia_coli_CFT073]	41.7892	0.0653081
:c1332167-1331967_hypothetical_protein_c1404_[Escherichia_coli_CFT073]	41.791	0.0653501
:c1158748-1158359_hypothetical_protein_c1204_[Escherichia_coli_CFT073]	41.7949	0.0654379
:c163359-162793_hypothetical_protein_c0169_[Escherichia_coli_CFT073]	41.7989	0.0655314
:c310817-310629_hypothetical_protein_c0341_[Escherichia_coli_CFT073]	41.7989	0.0655314
:c2321281-2321117_hypothetical_protein_c2481_[Escherichia_coli_CFT073]	41.8182	0.0659749
:c1408505-1408353_hypothetical_protein_c1538_[Escherichia_coli_CFT073]	41.8301	0.06625
:c3701984-3701832_hypothetical_protein_c3873_[Escherichia_coli_CFT073]	41.8301	0.06625
:c761331-761179_hypothetical_protein_c0778_[Escherichia_coli_CFT073]	41.8301	0.06625
:c3437564-3436965_PapA_protein_[Escherichia_coli_CFT073]	41.8333	0.0663258
:5230178-5230318_hypothetical_protein_c5489_[Escherichia_coli_CFT073]	41.844	0.0665731
:c4576415-4576275_hypothetical_protein_c4813_[Escherichia_coli_CFT073]	41.844	0.0665731
:c547221-547081_hypothetical_protein_c0567_[Escherichia_coli_CFT073]	41.844	0.0665731
:c2764564-2763026_multidrug_resistance_protein_Y_[Escherichia_coli_CFT073]	41.8454	0.0666053
:c1000023-999895_hypothetical_protein_c1035_[Escherichia_coli_CFT073]	41.8605	0.0669578
:c1290235-1290107_hypothetical_protein_c1357_[Escherichia_coli_CFT073]	41.8605	0.0669578
:c23076-22948_hypothetical_protein_c0026_[Escherichia_coli_CFT073]	41.8605	0.0669578
:c875351-875223_hypothetical_protein_c0902_[Escherichia_coli_CFT073]	41.8605	0.0669578
:1193363-1193866_F1C_minor_fimbrial_subunit_protein_G_presursor_[Escherichia_coli_CFT073]	41.8651	0.0670657
:c4165423-4165040_hypothetical_protein_c4383_[Escherichia_coli_CFT073]	41.9271	0.0685293
:4279013-4280371_hexuronate_transporter_[Escherichia_coli_CFT073]	41.9426	0.0688995
:c4164997-4164557_hypothetical_protein_c4382_[Escherichia_coli_CFT073]	41.9501	0.0690791
:1458073-1458327_hypothetical_protein_c1611_[Escherichia_coli_CFT073]	41.9608	0.069335
:c3998030-3995436_outer_membrane_usher_protein_ycbS_[Escherichia_coli_CFT073]	41.9653	0.0694439
:c273530-272721_hypothetical_protein_c0293_[Escherichia_coli_CFT073]	41.9753	0.0696845
:c3122304-3121993_hypothetical_protein_c3274_[Escherichia_coli_CFT073]	41.9872	0.0699711
:1691131-1691361_hypothetical_protein_c1850_[Escherichia_coli_CFT073]	41.9913	0.0700719
:4295755-4296330_hypothetical_protein_c4510_[Escherichia_coli_CFT073]	42.0139	0.0706194
:1247421-1247903_curlin_minor_subunit_[Escherichia_coli_CFT073]	42.029	0.0709879
:2922287-2922424_hypothetical_protein_c3046_[Escherichia_coli_CFT073]	42.029	0.0709879
:c2375438-2375301_hypothetical_protein_c2541_[Escherichia_coli_CFT073]	42.029	0.0709879
:c2458862-2458725_hypothetical_protein_c2612_[Escherichia_coli_CFT073]	42.029	0.0709879
:3587693-3588676_putative_c4-dicarboxylate_transport_system_binding_protein_[Escherichia_coli_CFT073]	42.0732	0.0720748
:c3373215-3372772_putative_mannitol_phosphotransferase_subunit_EIIA_[Escherichia_coli_CFT073]	42.1171	0.0731684
:1490529-1490744_hypothetical_protein_c1655_[Escherichia_coli_CFT073]	42.1296	0.0734821
:4087994-4088152_hypothetical_protein_c4309_[Escherichia_coli_CFT073]	42.1384	0.0737017
:1132944-1134404_hypothetical_protein_c1170_[Escherichia_coli_CFT073]	42.1629	0.0743212
:c4918832-4917294_DNA-binding_transcriptional_activator_CadC_[Escherichia_coli_CFT073]	42.1702	0.0745073
:5099082-5099771_hypothetical_protein_c5357_[Escherichia_coli_CFT073]	42.1739	0.0746005
:3416056-3416892_hypothetical_protein_c3567_[Escherichia_coli_CFT073]	42.1744	0.0746137
:c1642525-1642334_hypothetical_protein_c1809_[Escherichia_coli_CFT073]	42.1875	0.0749463
:1455579-1455815_hypothetical_protein_c1607_[Escherichia_coli_CFT073]	42.1941	0.0751145
:c3471619-3470630_hypothetical_protein_c3630_[Escherichia_coli_CFT073]	42.2222	0.0758354
:c3990802-3990197_hypothetical_protein_c4204_[Escherichia_coli_CFT073]	42.2442	0.076403
:c263653-263015_hypothetical_protein_c0282_[Escherichia_coli_CFT073]	42.2535	0.0766438
:c5020500-5020333_hypothetical_protein_c5270_[Escherichia_coli_CFT073]	42.2619	0.0768614
:2190594-2191007_transthyretin-like_protein_[Escherichia_coli_CFT073]	42.2705	0.0770858
:c162787-162173_hypothetical_protein_c0168_[Escherichia_coli_CFT073]	42.2764	0.0772394
:c2120440-2120318_hypothetical_protein_c2300_[Escherichia_coli_CFT073]	42.2764	0.0772394
:c3706445-3705507_DNA-binding_transcriptional_activator_TdcA_[Escherichia_coli_CFT073]	42.279	0.0773072
:c415022-414420_Type_1_fimbriae_regulatory_protein_fimB_[Escherichia_coli_CFT073]	42.2886	0.0775564
:c2012084-2011326_putative_transcriptional_regulator_YdjF_[Escherichia_coli_CFT073]	42.2925	0.0776594
:1574972-1575127_hypothetical_protein_c1740_[Escherichia_coli_CFT073]	42.3077	0.0780583
:c482765-482610_hypothetical_protein_c0500_[Escherichia_coli_CFT073]	42.3077	0.0780583
:c3382608-3382342_hypothetical_protein_c3527_[Escherichia_coli_CFT073]	42.3221	0.0784378
:c4961833-4961189_hypothetical_protein_c5205_[Escherichia_coli_CFT073]	42.3256	0.0785298
:912449-912670_putative_regulator_for_prophage_[Escherichia_coli_CFT073]	42.3423	0.0789734
:1179502-1180776_microcin_H47_secretion_protein_[Escherichia_coli_CFT073]	42.3529	0.079255
:4280380-4281033_putative_glucosidase_[Escherichia_coli_CFT073]	42.3547	0.0793028
:c2059263-2059120_hypothetical_protein_c2232_[Escherichia_coli_CFT073]	42.3611	0.0794725
:c3477647-3476175_putative_sialic_acid_transporter_[Escherichia_coli_CFT073]	42.3625	0.0795102
:1178897-1179349_MchD_protein_[Escherichia_coli_CFT073]	42.3841	0.0800872
:1219723-1220859_hypothetical_protein_c1269_[Escherichia_coli_CFT073]	42.3923	0.080306
:1538497-1539114_thymidine_kinase_[Escherichia_coli_CFT073]	42.3948	0.0803749
:3121057-3121485_hypothetical_protein_c3271_[Escherichia_coli_CFT073]	42.4242	0.0811687
:4031097-4031228_hypothetical_protein_c4243_[Escherichia_coli_CFT073]	42.4242	0.0811687
:c5134233-5133508_hypothetical_protein_c5389_[Escherichia_coli_CFT073]	42.4242	0.0811687
:c528275-528144_hypothetical_protein_c0547_[Escherichia_coli_CFT073]	42.4242	0.0811687
:1217510-1218772_hypothetical_protein_c1267_[Escherichia_coli_CFT073]	42.4386	0.0815593
:2495351-2495536_yehK_protein_[Escherichia_coli_CFT073]	42.4731	0.0825006
:2764251-2764589_hypothetical_protein_c2903_[Escherichia_coli_CFT073]	42.4779	0.0826311
:c3421610-3421458_hypothetical_protein_c3571_[Escherichia_coli_CFT073]	42.4837	0.08279
:c3809608-3809336_hypothetical_protein_c3994_[Escherichia_coli_CFT073]	42.4908	0.0829876
:4323460-4324515_hypothetical_protein_c4546_[Escherichia_coli_CFT073]	42.5189	0.083764
:391165-392154_LysR_family_transcriptional_regulator_[Escherichia_coli_CFT073]	42.5253	0.0839393
:1210510-1210944_hypothetical_protein_c1259_[Escherichia_coli_CFT073]	42.5287	0.0840361
:3442496-3442756_hypothetical_protein_c3599_[Escherichia_coli_CFT073]	42.5287	0.0840361
:c1634148-1633510_hypothetical_protein_c1800_[Escherichia_coli_CFT073]	42.5665	0.0850911
:c5157636-5156665_hypothetical_protein_c5415_[Escherichia_coli_CFT073]	42.5926	0.0858254
:c167462-166848_fimbrial-like_protein_yadN_[Escherichia_coli_CFT073]	42.6016	0.0860808
:c2465091-2464639_PTS_system_galactitol-specific_transporter_subunit_IIA_[Escherichia_coli_CFT073]	42.6049	0.0861723
:1419420-1419818_lambdoid_prophage_DLP12_antitermination_protein_Q_[Escherichia_coli_CFT073]	42.6065	0.0862193
:c1554214-1552943_voltage-gated_potassium_channel_[Escherichia_coli_CFT073]	42.6101	0.0863198
:3140917-3141573_serine/threonine-specific_protein_phosphatase_2_[Escherichia_coli_CFT073]	42.618	0.0865441
:2097929-2098531_hypothetical_protein_c2276_[Escherichia_coli_CFT073]	42.6202	0.0866086
:3197131-3197259_hypothetical_protein_c3355_[Escherichia_coli_CFT073]	42.6357	0.0870481
:c4095485-4095153_acid-resistance_protein_[Escherichia_coli_CFT073]	42.6426	0.0872476
:2533353-2533556_hypothetical_protein_c2686_[Escherichia_coli_CFT073]	42.6471	0.087374
:4314777-4315388_hypothetical_protein_c4536_[Escherichia_coli_CFT073]	42.6471	0.087374
:1446031-1446309_hypothetical_protein_c1594_[Escherichia_coli_CFT073]	42.6523	0.0875249
:c1799306-1797633_hypothetical_protein_c1956_[Escherichia_coli_CFT073]	42.6523	0.0875249
:4368038-4368208_hypothetical_protein_c4605_[Escherichia_coli_CFT073]	42.6901	0.0886112
:c1462542-1462276_cell_division_topological_specificity_factor_MinE_[Escherichia_coli_CFT073]	42.6966	0.0888014
:c2163622-2163071_putative_kinase_inhibitor_[Escherichia_coli_CFT073]	42.7536	0.090464
:c1935270-1934359_putative_transcriptional_regulator_YdiP_[Escherichia_coli_CFT073]	42.7632	0.0907443
:4905707-4905865_hypothetical_protein_c5129_[Escherichia_coli_CFT073]	42.7673	0.0908662
:1413040-1413420_hypothetical_protein_c1547_[Escherichia_coli_CFT073]	42.7822	0.0913048
:c1421149-1420007_outer_membrane_porin_protein_nmpC_[Escherichia_coli_CFT073]	42.7822	0.0913048
:5135689-5136291_tyrosine_recombinase_[Escherichia_coli_CFT073]	42.7861	0.0914207
:c459931-459245_hypothetical_protein_c0470_[Escherichia_coli_CFT073]	42.7948	0.0916783
:1086555-1086818_cold_shock_gene_[Escherichia_coli_CFT073]	42.803	0.0919238
:896229-897557_membrane_protein_yliF_[Escherichia_coli_CFT073]	42.8141	0.0922547
:2185750-2186877_outer_membrane_protein_N_[Escherichia_coli_CFT073]	42.8191	0.0924039
:c1246040-1245651_curli_assembly_protein_CsgE_[Escherichia_coli_CFT073]	42.8205	0.0924446
:2363732-2364142_hypothetical_protein_c2525_[Escherichia_coli_CFT073]	42.8224	0.0925004
:4322181-4323443_hypothetical_protein_c4545_[Escherichia_coli_CFT073]	42.8345	0.0928634
:1480151-1480339_hypothetical_protein_c1642_[Escherichia_coli_CFT073]	42.8571	0.0935427
:271030-271638_hypothetical_protein_c0291_[Escherichia_coli_CFT073]	42.8571	0.0935427
:c1325994-1325491_hypothetical_protein_c1397_[Escherichia_coli_CFT073]	42.8571	0.0935427
:c2418415-2417198_putative_colanic_acid_biosynthesis_protein_[Escherichia_coli_CFT073]	42.8571	0.0935427
:c3755279-3753621_outer-membrane_protein_yhbX_[Escherichia_coli_CFT073]	42.8571	0.0935427
:c4950092-4949967_hypothetical_protein_c5190_[Escherichia_coli_CFT073]	42.8571	0.0935427
:1691409-1691963_ribosomal-protein-L7/L12-serine_acetyltransferase_[Escherichia_coli_CFT073]	42.8829	0.0943201
:2137378-2137890_ferritin_[Escherichia_coli_CFT073]	42.885	0.0943839
:c3870025-3869807_putative_regulator_[Escherichia_coli_CFT073]	42.9224	0.095522
:c1245626-1245210_curli_assembly_protein_CsgF_[Escherichia_coli_CFT073]	42.9257	0.0956225
:2872876-2873052_hypothetical_protein_c3010_[Escherichia_coli_CFT073]	42.9379	0.0959962
:1248461-1248793_putative_autoagglutination_protein_[Escherichia_coli_CFT073]	42.9429	0.0961525
:c1455343-1454054_hypothetical_protein_c1606_[Escherichia_coli_CFT073]	42.9457	0.0962384
:c1801061-1799700_hypothetical_protein_c1958_[Escherichia_coli_CFT073]	42.9515	0.096417
:c4298924-4297605_hypothetical_protein_c4512_[Escherichia_coli_CFT073]	42.9545	0.0965095
:c2886409-2886119_hypothetical_protein_c3023_[Escherichia_coli_CFT073]	42.9553	0.0965336
:4908549-4908683_hypothetical_protein_c5132_[Escherichia_coli_CFT073]	42.963	0.0967691
:c3898104-3897628_bacterioferritin_[Escherichia_coli_CFT073]	42.9769	0.0972013
:c701380-701039_hypothetical_protein_c0719_[Escherichia_coli_CFT073]	42.9825	0.0973722
:c3445577-3445257_hypothetical_protein_c3606_[Escherichia_coli_CFT073]	42.9907	0.0976267
:c3631173-3630967_glycogen_synthesis_protein_GlgS_[Escherichia_coli_CFT073]	42.9952	0.0977671
:4935990-4938038_putative_iron-regulated_outer_membrane_virulence_protein_[Escherichia_coli_CFT073]	42.9966	0.0978111
:4586549-4587529_hypothetical_protein_c4822_[Escherichia_coli_CFT073]	43.0173	0.0984581
:1131195-1131359_hypothetical_protein_c1167_[Escherichia_coli_CFT073]	43.0303	0.0988644
:1187512-1187841_putative_F1C_and_S_fimbrial_switch_regulatory_protein_[Escherichia_coli_CFT073]	43.0303	0.0988644
:1672343-1673239_hypothetical_protein_c1835_[Escherichia_coli_CFT073]	43.0323	0.0989279
:c1465486-1465085_hypothetical_protein_c1626_[Escherichia_coli_CFT073]	43.0348	0.0990063
:1643745-1644053_hypothetical_protein_c1811_[Escherichia_coli_CFT073]	43.0421	0.0992339
:4168686-4169756_D-xylose_transporter_subunit_XylF_[Escherichia_coli_CFT073]	43.0439	0.0992909
:c1559696-1559193_hypothetical_protein_c1724_[Escherichia_coli_CFT073]	43.0556	0.0996586
:c387635-387492_50S_ribosomal_protein_L36_[Escherichia_coli_CFT073]	43.0556	0.0996586
:c3456432-3455734_hypothetical_protein_c3618_[Escherichia_coli_CFT073]	43.0615	0.0998468
:4929731-4930684_hypothetical_protein_c5163_[Escherichia_coli_CFT073]	43.0818	0.100488
:c2320926-2320804_hypothetical_protein_c2480_[Escherichia_coli_CFT073]	43.0894	0.100731
:c4407716-4406856_transcriptional_antiterminator_BglG_[Escherichia_coli_CFT073]	43.0894	0.100731
:c400976-400086_putative_transcriptional_regulator_YkgA_[Escherichia_coli_CFT073]	43.0976	0.100993
:c4297608-4296883_hypothetical_protein_c4511_[Escherichia_coli_CFT073]	43.1129	0.101481
:1465695-1466021_hypothetical_protein_c1627_[Escherichia_coli_CFT073]	43.1193	0.101683
:4057834-4058589_putative_regulator_[Escherichia_coli_CFT073]	43.1217	0.101761
:c3430603-3429593_PapG_protein_[Escherichia_coli_CFT073]	43.1256	0.101887
:2378053-2378103_his_operon_leader_peptide_[Escherichia_coli_CFT073]	43.1373	0.10226
:c2377522-2377268_hypothetical_protein_c2544_[Escherichia_coli_CFT073]	43.1373	0.10226
:5218354-5218638_hypothetical_protein_c5477_[Escherichia_coli_CFT073]	43.1579	0.102925
:3631437-3632066_hypothetical_protein_c3798_[Escherichia_coli_CFT073]	43.1746	0.103466
:3311423-3312001_hypothetical_protein_c3455_[Escherichia_coli_CFT073]	43.1779	0.103572
:4062169-4062300_hypothetical_protein_c4282_[Escherichia_coli_CFT073]	43.1818	0.1037
:5072718-5072849_hypothetical_protein_c5330_[Escherichia_coli_CFT073]	43.1818	0.1037
:c843272-843141_hypothetical_protein_c0869_[Escherichia_coli_CFT073]	43.1818	0.1037
:1086202-1086414_cold_shock_protein_CspG_[Escherichia_coli_CFT073]	43.1925	0.104047
:2559353-2560102_hypothetical_protein_c2711_[Escherichia_coli_CFT073]	43.2	0.104291
:287635-288201_hypothetical_protein_c0313_[Escherichia_coli_CFT073]	43.2099	0.104614
:323695-323937_hypothetical_protein_c0348_[Escherichia_coli_CFT073]	43.2099	0.104614
:c162146-161550_hypothetical_protein_c0167_[Escherichia_coli_CFT073]	43.2161	0.104817
:3338018-3338209_hypothetical_protein_c3478_[Escherichia_coli_CFT073]	43.2292	0.105245
:c1765014-1763329_ABC_transporter_ATP-binding_protein_[Escherichia_coli_CFT073]	43.2384	0.10555
:c2164123-2163791_multidrug_efflux_protein_[Escherichia_coli_CFT073]	43.2432	0.105708
:1177321-1178871_MchC_protein_[Escherichia_coli_CFT073]	43.2624	0.106341
:c2484182-2483901_hypothetical_protein_c2640_[Escherichia_coli_CFT073]	43.2624	0.106341
:c3666757-3666617_hypothetical_protein_c3835_[Escherichia_coli_CFT073]	43.2624	0.106341
:c4909461-4909009_hypothetical_protein_c5135_[Escherichia_coli_CFT073]	43.2671	0.106496
:1248914-1249225_hypothetical_protein_c1308_[Escherichia_coli_CFT073]	43.2692	0.106566
:1986090-1986260_hypothetical_protein_c2149_[Escherichia_coli_CFT073]	43.2749	0.106753
:c1005765-1004569_formate_transporter_[Escherichia_coli_CFT073]	43.2749	0.106753
:c3060587-3060075_hypothetical_protein_c3198_[Escherichia_coli_CFT073]	43.2749	0.106753
:401176-402060_2,5-diketo-D-gluconic_acid_reductase_A_[Escherichia_coli_CFT073]	43.2768	0.106818
:918325-918525_hypothetical_protein_c0944_[Escherichia_coli_CFT073]	43.2836	0.107042
:c3059135-3058935_hypothetical_protein_c3196_[Escherichia_coli_CFT073]	43.2836	0.107042
:4069197-4070261_hypothetical_protein_c4289_[Escherichia_coli_CFT073]	43.2864	0.107135
:c4278832-4277738_putative_transcriptional_regulator_[Escherichia_coli_CFT073]	43.2877	0.107178
:c630053-629100_outer_membrane_protease_[Escherichia_coli_CFT073]	43.2914	0.107302
:c5129590-5128919_hypothetical_protein_c5383_[Escherichia_coli_CFT073]	43.3036	0.107708
:4280984-4282768_putative_glucosidase_[Escherichia_coli_CFT073]	43.3053	0.107766
:2201204-2202706_hypothetical_protein_c2397_[Escherichia_coli_CFT073]	43.3134	0.108035
:c1639208-1638177_hypothetical_protein_c1804_[Escherichia_coli_CFT073]	43.314	0.108055
:c4941841-4940831_PapG_protein_[Escherichia_coli_CFT073]	43.3234	0.108372
:1715196-1715525_hypothetical_protein_c1880_[Escherichia_coli_CFT073]	43.3333	0.108704
:3278592-3278810_lipoprotein_ygdR_[Escherichia_coli_CFT073]	43.379	0.110246
:3059233-3059859_putative_repressor_protein_of_prophage_[Escherichia_coli_CFT073]	43.3812	0.11032
:1720751-1721794_hypothetical_protein_c1886_[Escherichia_coli_CFT073]	43.3908	0.110647
:c1398512-1397370_prophage_lambda_integrase_[Escherichia_coli_CFT073]	43.3946	0.110776
:c347775-347299_hypothetical_protein_c0367_[Escherichia_coli_CFT073]	43.3962	0.110832
:c2060220-2059933_hypothetical_protein_c2233_[Escherichia_coli_CFT073]	43.4028	0.111055
:2324459-2324587_hypothetical_protein_c2483_[Escherichia_coli_CFT073]	43.4109	0.111331
:19356-20615_hypothetical_protein_c0023_[Escherichia_coli_CFT073]	43.4127	0.111394
:c4951988-4951662_hypothetical_protein_c5195_[Escherichia_coli_CFT073]	43.4251	0.111818
:279881-280306_hypothetical_protein_c0299_[Escherichia_coli_CFT073]	43.4272	0.111892
:c283940-283149_hypothetical_protein_c0307_[Escherichia_coli_CFT073]	43.4343	0.112136
:5113560-5114123_D-gluconate_kinase_[Escherichia_coli_CFT073]	43.4397	0.112321
:c1834196-1833831_multidrug_efflux_system_protein_MdtJ_[Escherichia_coli_CFT073]	43.4426	0.112421
:3930841-3931008_hypothetical_protein_c4145_[Escherichia_coli_CFT073]	43.4524	0.112757
:c1773975-1773472_fimbrial-like_protein_ydeR_[Escherichia_coli_CFT073]	43.4524	0.112757
:4399245-4399718_putative_inner_membrane_protein_[Escherichia_coli_CFT073]	43.4599	0.113017
:4365361-4366257_putative_transcriptional_regulator_YidL_[Escherichia_coli_CFT073]	43.4783	0.113652
:c1337126-1336989_hypothetical_protein_c1415_[Escherichia_coli_CFT073]	43.4783	0.113652
:c2961515-2961378_hypothetical_protein_c3084_[Escherichia_coli_CFT073]	43.4783	0.113652
:c2652029-2651400_Ais_protein_[Escherichia_coli_CFT073]	43.4921	0.114131
:2249741-2250547_hypothetical_protein_c2437_[Escherichia_coli_CFT073]	43.4944	0.114213
:4377158-4377649_hypothetical_protein_c4617_[Escherichia_coli_CFT073]	43.4959	0.114266
:1337203-1337379_hypothetical_protein_c1417_[Escherichia_coli_CFT073]	43.5028	0.114506
:c2464608-2464324_PTS_system_galactitol-specific_transporter_subunit_IIB_[Escherichia_coli_CFT073]	43.5088	0.114714
:c1999557-1997614_hypothetical_protein_c2163_[Escherichia_coli_CFT073]	43.5185	0.115054
:1210326-1210688_hypothetical_protein_c1258_[Escherichia_coli_CFT073]	43.5262	0.115322
:4344940-4345302_hypothetical_protein_c4585_[Escherichia_coli_CFT073]	43.5262	0.115322
:c4159385-4159023_hypothetical_protein_c4376_[Escherichia_coli_CFT073]	43.5262	0.115322
:1663427-1663612_hypothetical_protein_c1829_[Escherichia_coli_CFT073]	43.5484	0.116103
:c3395424-3394417_hypothetical_protein_c3542_[Escherichia_coli_CFT073]	43.5516	0.116215
:4632951-4633379_universal_stress_protein_UspD_[Escherichia_coli_CFT073]	43.5897	0.117565
:c3845233-3844571_DNA-binding_transcriptional_regulator_EnvR_[Escherichia_coli_CFT073]	43.5897	0.117565
:c447604-446942_galactoside_O-acetyltransferase_[Escherichia_coli_CFT073]	43.5897	0.117565
:c4664763-4664569_hypothetical_protein_c4903_[Escherichia_coli_CFT073]	43.5897	0.117565
:c1252441-1251284_glucans_biosynthesis_protein_[Escherichia_coli_CFT073]	43.6097	0.118275
:c2216620-2215727_hypothetical_protein_c2416_[Escherichia_coli_CFT073]	43.6242	0.118793
:5036179-5036790_hypothetical_protein_c5297_[Escherichia_coli_CFT073]	43.6275	0.11891
:913522-913725_hypothetical_protein_c0938_[Escherichia_coli_CFT073]	43.6275	0.11891
:c1768229-1766514_putative_sulfatase_ydeN_[Escherichia_coli_CFT073]	43.648	0.119649
:3064143-3065315_hypothetical_protein_c3204_[Escherichia_coli_CFT073]	43.6488	0.119675
:5205759-5205884_hypothetical_protein_c5464_[Escherichia_coli_CFT073]	43.6508	0.119748
:c1473086-1472961_hypothetical_protein_c1636_[Escherichia_coli_CFT073]	43.6508	0.119748
:c1774518-1773988_fimbrial-like_protein_ydeS_[Escherichia_coli_CFT073]	43.6911	0.121207
:c4301442-4299658_hypothetical_protein_c4514_[Escherichia_coli_CFT073]	43.6975	0.121437
:c3836027-3835131_putative_ribose_ABC_transporter_[Escherichia_coli_CFT073]	43.7012	0.121573
:1297612-1297746_hypothetical_protein_c1368_[Escherichia_coli_CFT073]	43.7037	0.121663
:c1921344-1921075_hypothetical_protein_c2080_[Escherichia_coli_CFT073]	43.7037	0.121663
:c2019249-2018932_hypothetical_protein_c2182_[Escherichia_coli_CFT073]	43.7107	0.121918
:c1387706-1387524_hypothetical_protein_c1502_[Escherichia_coli_CFT073]	43.7158	0.122106
:c1119698-1119285_putative_PGA_biosynthesis_protein_[Escherichia_coli_CFT073]	43.7198	0.12225
:c1345365-1345087_hypothetical_protein_c1435_[Escherichia_coli_CFT073]	43.7276	0.122535
:660513-661646_ferric_enterobactin_transport_protein_FepE_[Escherichia_coli_CFT073]	43.739	0.122952
:378117-378731_hypothetical_protein_c0399_[Escherichia_coli_CFT073]	43.7398	0.122983
:2525295-2525534_hypothetical_protein_c2678_[Escherichia_coli_CFT073]	43.75	0.123357
:c299861-299622_hypothetical_protein_c0328_[Escherichia_coli_CFT073]	43.75	0.123357
:c870473-870282_hypothetical_protein_c0897_[Escherichia_coli_CFT073]	43.75	0.123357
:2545821-2546519_DNA-binding_transcriptional_activator_YeiL_[Escherichia_coli_CFT073]	43.7768	0.124345
:c2301629-2300760_putative_3-hydroxyacyl-CoA_dehydrogenase_[Escherichia_coli_CFT073]	43.7931	0.124948
:4744384-4744803_hypothetical_protein_c4968_[Escherichia_coli_CFT073]	43.8095	0.125558
:697883-698092_cold_shock_protein_CspE_[Escherichia_coli_CFT073]	43.8095	0.125558
:c1799675-1799361_PTS_system,_cellobiose-specific_IIA_component_[Escherichia_coli_CFT073]	43.8095	0.125558
:3723792-3724268_PTS_system_N-acetylgalactosamine-specific_transporter_subunit_IIB_[Escherichia_coli_CFT073]	43.8155	0.125781
:4088424-4088585_hypothetical_protein_c4311_[Escherichia_coli_CFT073]	43.8272	0.126215
:640627-640959_periplasmic_copper-binding_protein_[Escherichia_coli_CFT073]	43.8438	0.126839
:c1187156-1186872_putative_F1C_and_S_fimbrial_switch_regulatory_protein_[Escherichia_coli_CFT073]	43.8596	0.127432
:c2387755-2386589_UDP-glucose_6-dehydrogenase_[Escherichia_coli_CFT073]	43.8732	0.127942
:2163238-2163360_hypothetical_protein_c2351_[Escherichia_coli_CFT073]	43.9024	0.129048
:c2516758-2516636_hypothetical_protein_c2666_[Escherichia_coli_CFT073]	43.9024	0.129048
:528725-528913_hypothetical_protein_c0550_[Escherichia_coli_CFT073]	43.9153	0.129538
:c1975463-1975143_PTS_system_N,N'-diacetylchitobiose-specific_transporter_subunit_IIB_[Escherichia_coli_CFT073]	43.9252	0.129915
:359938-360390_hypothetical_protein_c0380_[Escherichia_coli_CFT073]	43.9294	0.130072
:1216518-1217309_hypothetical_protein_c1266_[Escherichia_coli_CFT073]	43.9394	0.130455
:4219224-4219421_hypothetical_protein_c4437_[Escherichia_coli_CFT073]	43.9394	0.130455
:c4938349-4938218_hypothetical_protein_c5175_[Escherichia_coli_CFT073]	43.9394	0.130455
:c4268440-4267970_putative_phosphotransferase_system_(PTS),_fructose-specific_[Escherichia_coli_CFT073]	43.949	0.130824
:c5133596-5132382_N-acetylneuraminic_acid_mutarotase_[Escherichia_coli_CFT073]	43.9506	0.130884
:3181153-3182037_hypothetical_protein_c3342_[Escherichia_coli_CFT073]	43.9548	0.131044
:5162553-5164772_hypothetical_protein_c5421_[Escherichia_coli_CFT073]	43.964	0.131396
:1962496-1962786_hypothetical_protein_c2123_[Escherichia_coli_CFT073]	43.9863	0.132254
:1612869-1614575_putative_sucrose_phosphorylase_[Escherichia_coli_CFT073]	43.9953	0.132604
:2186327-2186551_hypothetical_protein_c2384_[Escherichia_coli_CFT073]	44	0.132785
:c1671708-1671484_hypothetical_protein_c1833_[Escherichia_coli_CFT073]	44	0.132785
:c493612-493463_hypothetical_protein_c0510_[Escherichia_coli_CFT073]	44	0.132785
:3004042-3004425_hypothetical_protein_c3123_[Escherichia_coli_CFT073]	44.0104	0.133188
:c1348333-1348100_hypothetical_protein_c1442_[Escherichia_coli_CFT073]	44.0171	0.133447
:c4707295-4706324_pantothenate_kinase_[Escherichia_coli_CFT073]	44.0329	0.134062
:3751822-3752184_hypothetical_protein_c3928_[Escherichia_coli_CFT073]	44.0771	0.135791
:1461949-1462134_hypothetical_protein_c1620_[Escherichia_coli_CFT073]	44.086	0.136141
:c4654617-4652992_hypothetical_protein_c4895_[Escherichia_coli_CFT073]	44.0959	0.136531
:1902839-1903144_hypothetical_protein_c2059_[Escherichia_coli_CFT073]	44.1176	0.137389
:c2199244-2197781_PilV-like_protein_[Escherichia_coli_CFT073]	44.1257	0.137708
:c1964329-1963793_hypothetical_protein_c2125_[Escherichia_coli_CFT073]	44.1341	0.138041
:249923-250144_hypothetical_protein_c0256_[Escherichia_coli_CFT073]	44.1441	0.138441
:4828021-4829583_hypothetical_protein_c5052_[Escherichia_coli_CFT073]	44.1459	0.13851
:c4403349-4401733_hypothetical_protein_c4642_[Escherichia_coli_CFT073]	44.1558	0.138907
:c1818164-1817454_hypothetical_protein_c1975_[Escherichia_coli_CFT073]	44.1632	0.139199
:1381465-1381704_hypothetical_protein_c1491_[Escherichia_coli_CFT073]	44.1667	0.139339
:1663587-1663946_hypothetical_protein_c1830_[Escherichia_coli_CFT073]	44.1667	0.139339
:2060597-2060836_hypothetical_protein_c2235_[Escherichia_coli_CFT073]	44.1667	0.139339
:1132071-1132319_prophage_CP4-57_regulatory_protein_alpA_[Escherichia_coli_CFT073]	44.1767	0.139741
:c4934371-4934123_hypothetical_protein_c5170_[Escherichia_coli_CFT073]	44.1767	0.139741
:4934166-4934432_hypothetical_protein_c5171_[Escherichia_coli_CFT073]	44.1948	0.140465
:c1197932-1196895_hypothetical_protein_c1248_[Escherichia_coli_CFT073]	44.2197	0.141469
:4182810-4183277_2,3-diketo-L-gulonate_TRAP_transporter_small_permease_YiaM_[Escherichia_coli_CFT073]	44.2308	0.141918
:c1325494-1324706_hypothetical_protein_c1396_[Escherichia_coli_CFT073]	44.2332	0.142017
:4082560-4082724_hypothetical_protein_c4302_[Escherichia_coli_CFT073]	44.2424	0.14239
:c389979-388990_putative_oxidoreductase_[Escherichia_coli_CFT073]	44.2424	0.14239
:1457126-1457977_hypothetical_protein_c1610_[Escherichia_coli_CFT073]	44.2488	0.14265
:c1773412-1772498_fimbrial-like_protein_ydeQ_[Escherichia_coli_CFT073]	44.2623	0.143198
:1718427-1719167_hypothetical_protein_c1884_[Escherichia_coli_CFT073]	44.2645	0.143288
:c166739-165999_putative_chaperone_protein_EcpD_[Escherichia_coli_CFT073]	44.2645	0.143288
:1135368-1135961_hypothetical_protein_c1171_[Escherichia_coli_CFT073]	44.2761	0.143761
:3004572-3005090_hypothetical_protein_c3124_[Escherichia_coli_CFT073]	44.316	0.145396
:c3000309-2999773_hypothetical_protein_c3118_[Escherichia_coli_CFT073]	44.3203	0.145573
:3624578-3625141_putative_fimbrial_protein_[Escherichia_coli_CFT073]	44.3262	0.145818
:4158515-4158805_putative_transcriptional_regulator_[Escherichia_coli_CFT073]	44.3299	0.145969
:c1777183-1774532_outer_membrane_usher_protein_fimD_[Escherichia_coli_CFT073]	44.3439	0.146547
:c1460636-1460301_hypothetical_protein_c1616_[Escherichia_coli_CFT073]	44.3452	0.146603
:473506-473850_hypothetical_protein_c0486_[Escherichia_coli_CFT073]	44.3478	0.14671
:c4788704-4788342_hypothetical_protein_c5012_[Escherichia_coli_CFT073]	44.3526	0.146908
:334872-335351_hypothetical_protein_c0358_[Escherichia_coli_CFT073]	44.375	0.147837
:c3023580-3022540_hypothetical_protein_c3148_[Escherichia_coli_CFT073]	44.3804	0.148062
:1188213-1188755_F1C_major_fimbrial_subunit_[Escherichia_coli_CFT073]	44.3831	0.148173
:c1797614-1796169_6-phospho-beta-glucosidase_[Escherichia_coli_CFT073]	44.3983	0.148811
:c742437-741679_hypothetical_protein_c0760_[Escherichia_coli_CFT073]	44.4005	0.148902
:c3253963-3252383_PTS_system,_maltose_and_glucose-specific_IIABC_component_[Escherichia_coli_CFT073]	44.4023	0.148975
:2160734-2161762_outer_membrane_porin_protein_nmpC_[Escherichia_coli_CFT073]	44.4121	0.149384
:c1123036-1121018_outer_membrane_N-deacetylase_[Escherichia_coli_CFT073]	44.4279	0.150051
:1346450-1346602_hypothetical_protein_c1438_[Escherichia_coli_CFT073]	44.4444	0.150746
:1579581-1579769_hypothetical_protein_c1744_[Escherichia_coli_CFT073]	44.4444	0.150746
:2058862-2059149_hypothetical_protein_c2230_[Escherichia_coli_CFT073]	44.4444	0.150746
:2853443-2853703_hypothetical_protein_c2993_[Escherichia_coli_CFT073]	44.4444	0.150746
:3869397-3869810_large-conductance_mechanosensitive_channel_[Escherichia_coli_CFT073]	44.4444	0.150746
:4156259-4156384_hypothetical_protein_c4371_[Escherichia_coli_CFT073]	44.4444	0.150746
:c1566686-1566642_Trp_operon_leader_peptide_[Escherichia_coli_CFT073]	44.4444	0.150746
:c1778908-1778297_Type-1_fimbrial_protein,_A_chain_[Escherichia_coli_CFT073]	44.4444	0.150746
:c2827179-2827036_hypothetical_protein_c2963_[Escherichia_coli_CFT073]	44.4444	0.150746
:c738746-738594_hypothetical_protein_c0756_[Escherichia_coli_CFT073]	44.4444	0.150746
:c822216-821200_putative_transcriptional_regulator_YbhD_[Escherichia_coli_CFT073]	44.4444	0.150746
:3293880-3295109_putative_transport_protein_YqeG_[Escherichia_coli_CFT073]	44.4715	0.151891
:c3358749-3357853_putative_transcriptional_regulator_YgfI_[Escherichia_coli_CFT073]	44.4816	0.152317
:c2190461-2189790_transcriptional_regulatory_protein_YedW_[Escherichia_coli_CFT073]	44.494	0.152846
:3714656-3715120_hypothetical_protein_c3885_[Escherichia_coli_CFT073]	44.5161	0.153787
:c5129979-5129587_hypothetical_protein_c5384_[Escherichia_coli_CFT073]	44.5293	0.154349
:c980118-979726_hypothetical_protein_c1020_[Escherichia_coli_CFT073]	44.5293	0.154349
:3583042-3583791_putative_regulator_[Escherichia_coli_CFT073]	44.5333	0.154523
:30475-30840_hypothetical_protein_c0036_[Escherichia_coli_CFT073]	44.5355	0.154617
:5194682-5195029_hypothetical_protein_c5447_[Escherichia_coli_CFT073]	44.5402	0.154819
:c622165-621836_hypothetical_protein_c0638_[Escherichia_coli_CFT073]	44.5455	0.155043
:977042-977362_ATP-dependent_Clp_protease_adaptor_protein_ClpS_[Escherichia_coli_CFT073]	44.5483	0.155165
:3217751-3218044_hypothetical_protein_c3379_[Escherichia_coli_CFT073]	44.5578	0.155575
:791683-792642_hypothetical_protein_c0807_[Escherichia_coli_CFT073]	44.5833	0.156676
:c4819883-4818525_putative_c4-dicarboxylate_transport_transcriptional_regulatory_protein_[Escherichia_coli_CFT073]	44.5916	0.157034
:c2199854-2199297_putative_type_IV_pilin_protein_[Escherichia_coli_CFT073]	44.6237	0.158426
:2703828-2704190_D-erythro-7,8-dihydroneopterin_triphosphate_2'-epimerase_[Escherichia_coli_CFT073]	44.6281	0.158619
:5139035-5139760_chaperone_protein_fimC_[Escherichia_coli_CFT073]	44.6281	0.158619
:c367458-366397_outer_membrane_phosphoporin_protein_E_[Escherichia_coli_CFT073]	44.6328	0.158823
:3223002-3223523_hypothetical_protein_c3385_[Escherichia_coli_CFT073]	44.636	0.158965
:c262613-262128_hypothetical_protein_c0280_[Escherichia_coli_CFT073]	44.6502	0.159585
:604511-605287_hydroxypyruvate_isomerase_[Escherichia_coli_CFT073]	44.6589	0.159968
:c4088616-4088467_hypothetical_protein_c4312_[Escherichia_coli_CFT073]	44.6667	0.160306
:3021386-3021976_putative_DNA-invertase_from_lambdoid_prophage_Rac_[Escherichia_coli_CFT073]	44.6701	0.160455
:4405947-4406087_hypothetical_protein_c4645_[Escherichia_coli_CFT073]	44.6809	0.16093
:4610449-4611003_hypothetical_protein_c4848_[Escherichia_coli_CFT073]	44.6847	0.161099
:c2014179-2013211_putative_sugar_kinase_ydjH_[Escherichia_coli_CFT073]	44.6852	0.161123
:4611357-4612730_putative_glycoporin_[Escherichia_coli_CFT073]	44.687	0.161203
:5055419-5055691_hypothetical_protein_c5315_[Escherichia_coli_CFT073]	44.6886	0.161273
:1694944-1695612_lipoprotein_ydcL_[Escherichia_coli_CFT073]	44.6936	0.16149
:3620671-3621339_putative_disulfide_isomerase_[Escherichia_coli_CFT073]	44.6936	0.16149
:c2109722-2109591_hypothetical_protein_c2288_[Escherichia_coli_CFT073]	44.697	0.16164
:c195109-194723_hypothetical_protein_c0200_[Escherichia_coli_CFT073]	44.7028	0.1619
:c1806009-1805113_hypothetical_protein_c1963_[Escherichia_coli_CFT073]	44.7046	0.161976
:c1962801-1962424_hypothetical_protein_c2122_[Escherichia_coli_CFT073]	44.709	0.162172
:4036870-4036992_hypothetical_protein_c4252_[Escherichia_coli_CFT073]	44.7154	0.162457
:c2036623-2036501_hypothetical_protein_c2201_[Escherichia_coli_CFT073]	44.7154	0.162457
:302679-303995_putative_L-fucose_permease_[Escherichia_coli_CFT073]	44.7229	0.162785
:c3250546-3249590_2-hydroxyacid_dehydrogenase_[Escherichia_coli_CFT073]	44.7231	0.162796
:c165964-163376_putative_outer_membrane_usher_protein_[Escherichia_coli_CFT073]	44.7277	0.163
:c1752853-1752635_hypothetical_protein_c1919_[Escherichia_coli_CFT073]	44.7489	0.163941
:3800842-3801051_hypothetical_protein_c3983_[Escherichia_coli_CFT073]	44.7619	0.164523
:17698-19227_hypothetical_protein_c0022_[Escherichia_coli_CFT073]	44.7712	0.16494
:c2530984-2529464_galactose/methyl_galaxtoside_transporter_ATP-binding_protein_[Escherichia_coli_CFT073]	44.7732	0.165026
:c402822-402220_hypothetical_protein_c0418_[Escherichia_coli_CFT073]	44.7761	0.165158
:c3529292-3528516_KpsM_protein_[Escherichia_coli_CFT073]	44.7876	0.165674
:1795479-1795862_DNA-binding_transcriptional_activator_MarA_[Escherichia_coli_CFT073]	44.7917	0.165855
:1926554-1926937_hypothetical_protein_c2084_[Escherichia_coli_CFT073]	44.7917	0.165855
:3779666-3779953_putative_sigma(54)_modulation_protein_[Escherichia_coli_CFT073]	44.7917	0.165855
:c3568611-3568324_hypothetical_protein_c3735_[Escherichia_coli_CFT073]	44.7917	0.165855
:c3431177-3430647_PapF_protein_[Escherichia_coli_CFT073]	44.8211	0.167179
:c4942415-4941885_PapF_protein_[Escherichia_coli_CFT073]	44.8211	0.167179
:2962530-2962790_putative_ferredoxin-like_protein_yfhL_[Escherichia_coli_CFT073]	44.8276	0.167472
:2806006-2806770_hypothetical_protein_c2941_[Escherichia_coli_CFT073]	44.8366	0.167879
:c1408736-1408572_lambda_regulatory_protein_CIII_[Escherichia_coli_CFT073]	44.8485	0.168417
:c4763572-4763078_putative_sorbose_PTS_component_[Escherichia_coli_CFT073]	44.8485	0.168417
:5194885-5195040_hypothetical_protein_c5448_[Escherichia_coli_CFT073]	44.8718	0.169476
:c3340477-3340166_hypothetical_protein_c3481_[Escherichia_coli_CFT073]	44.8718	0.169476
:1256915-1257139_hypothetical_protein_c1315_[Escherichia_coli_CFT073]	44.8889	0.170255
:c3051380-3051165_lambdoid_prophage_Qin_lysis_protein_S_[Escherichia_coli_CFT073]	44.9074	0.171102
:c2014999-2014163_hypothetical_protein_c2177_[Escherichia_coli_CFT073]	44.9223	0.171786
:c1378040-1377903_hypothetical_protein_c1482_[Escherichia_coli_CFT073]	44.9275	0.172025
:c1402507-1402232_hypothetical_protein_c1527_[Escherichia_coli_CFT073]	44.9275	0.172025
:c1748927-1748790_30S_ribosomal_subunit_S22_[Escherichia_coli_CFT073]	44.9275	0.172025
:3415551-3415946_hypothetical_protein_c3566_[Escherichia_coli_CFT073]	44.9495	0.173036
:1911393-1911521_hypothetical_protein_c2070_[Escherichia_coli_CFT073]	44.9612	0.173578
:4370980-4371108_hypothetical_protein_c4610_[Escherichia_coli_CFT073]	44.9612	0.173578
:c3841828-3841700_hypothetical_protein_c4025_[Escherichia_coli_CFT073]	44.9612	0.173578
:c2772574-2771630_putative_transporter_YfdV_[Escherichia_coli_CFT073]	44.9735	0.174147
:1707609-1707857_hypothetical_protein_c1870_[Escherichia_coli_CFT073]	44.9799	0.174442
:c2549913-2548858_hypothetical_protein_c2701_[Escherichia_coli_CFT073]	44.9811	0.174495
:2128429-2128857_universal_stress_protein_UspC_[Escherichia_coli_CFT073]	44.9883	0.174833
:4083657-4084256_outer_membrane_protein_Slp_[Escherichia_coli_CFT073]	45	0.175375
:4567530-4567829_hypothetical_protein_c4802_[Escherichia_coli_CFT073]	45	0.175375
:583093-583434_hypothetical_protein_c0603_[Escherichia_coli_CFT073]	45.0292	0.176738
:5193203-5193826_DNA-binding_transcriptional_activator_BglJ_[Escherichia_coli_CFT073]	45.0321	0.176869
:c2452835-2452221_hypothetical_protein_c2607_[Escherichia_coli_CFT073]	45.0407	0.177272
:1928472-1929743_putative_transport_protein_YdiN_[Escherichia_coli_CFT073]	45.0472	0.177577
:c3433539-3432934_PapD_protein_[Escherichia_coli_CFT073]	45.0495	0.177687
:3766601-3767146_hypothetical_protein_c3944_[Escherichia_coli_CFT073]	45.0549	0.177942
:c5181253-5180444_putative_C4-dicarboxylate-binding_periplasmic_protein_[Escherichia_coli_CFT073]	45.0617	0.17826
:c2209767-2208805_hypothetical_protein_c2406_[Escherichia_coli_CFT073]	45.0675	0.178532
:c1264452-1264198_biofilm_formation_regulatory_protein_BssS_[Escherichia_coli_CFT073]	45.098	0.179972
:c1423780-1423628_hypothetical_protein_c1566_[Escherichia_coli_CFT073]	45.098	0.179972
:c2511371-2511219_hypothetical_protein_c2662_[Escherichia_coli_CFT073]	45.098	0.179972
:3666317-3666766_cryptic_beta-D-galactosidase_subunit_beta_[Escherichia_coli_CFT073]	45.1111	0.180591
:3961054-3961350_hypothetical_protein_c4179_[Escherichia_coli_CFT073]	45.1178	0.18091
:c4572093-4571161_putative_acyltransferase_[Escherichia_coli_CFT073]	45.1233	0.181167
:470470-470664_hypothetical_protein_c0481_[Escherichia_coli_CFT073]	45.1282	0.181402
:c3863831-3863358_hypothetical_protein_c4045_[Escherichia_coli_CFT073]	45.1477	0.182328
:c2001254-1999554_chaperone_protein_hscC_[Escherichia_coli_CFT073]	45.1499	0.182435
:5192466-5193191_hypothetical_protein_c5444_[Escherichia_coli_CFT073]	45.1791	0.183828
:c3174137-3173277_oxidoreductase_ygcW_[Escherichia_coli_CFT073]	45.18	0.183874
:4547755-4548066_twin_arginine_translocase_protein_A_[Escherichia_coli_CFT073]	45.1923	0.184463
:c4804239-4803499_hypothetical_protein_c5027_[Escherichia_coli_CFT073]	45.2092	0.185274
:1671738-1672343_hypothetical_protein_c1834_[Escherichia_coli_CFT073]	45.2145	0.185532
:c4224266-4223232_putative_glycosyl_transferase_[Escherichia_coli_CFT073]	45.2174	0.18567
:c1329132-1328014_prophage_lambda_integrase_[Escherichia_coli_CFT073]	45.2189	0.185745
:3860309-3861157_hypothetical_protein_c4040_[Escherichia_coli_CFT073]	45.2297	0.186263
:c2771595-2770411_hypothetical_protein_c2907_[Escherichia_coli_CFT073]	45.2321	0.186378
:942022-942273_prophage_P2_Ogr_protein_[Escherichia_coli_CFT073]	45.2381	0.18667
:c1904992-1904867_hypothetical_protein_c2061_[Escherichia_coli_CFT073]	45.2381	0.18667
:c3013542-3013291_hypothetical_protein_c3136_[Escherichia_coli_CFT073]	45.2381	0.18667
:1189406-1190101_F1C_periplasmic_chaperone_[Escherichia_coli_CFT073]	45.2586	0.187664
:4023263-4023547_hypothetical_protein_c4235_[Escherichia_coli_CFT073]	45.2632	0.187884
:c2481597-2479102_outer_membrane_usher_protein_yehB_[Escherichia_coli_CFT073]	45.2724	0.188335
:2216985-2217821_hypothetical_protein_c2417_[Escherichia_coli_CFT073]	45.2808	0.18874
:c4983115-4982246_hypothetical_protein_c5230_[Escherichia_coli_CFT073]	45.2874	0.189062
:c1777935-1777225_chaperone_protein_fimC_[Escherichia_coli_CFT073]	45.2883	0.189109
:2322324-2324471_putative_outer_membrane_receptor_for_iron_compound_or_colicin_[Escherichia_coli_CFT073]	45.298	0.189579
:2056473-2056931_hypothetical_protein_c2227_[Escherichia_coli_CFT073]	45.3159	0.190456
:c3835100-3833574_ribose_ABC_transporter_ATP-binding_protein_[Escherichia_coli_CFT073]	45.3176	0.19054
:4139705-4141039_putative_transport_protein_YhjV_[Escherichia_coli_CFT073]	45.3184	0.190576
:c404495-403170_pyridine_nucleotide-disulfide_oxidoreductase_[Escherichia_coli_CFT073]	45.3243	0.190867
:1348095-1348244_hypothetical_protein_c1441_[Escherichia_coli_CFT073]	45.3333	0.191311
:1485730-1485879_hypothetical_protein_c1649_[Escherichia_coli_CFT073]	45.3333	0.191311
:1639452-1639709_hypothetical_protein_c1805_[Escherichia_coli_CFT073]	45.3488	0.192073
:c2904447-2904232_hypothetical_protein_c3032_[Escherichia_coli_CFT073]	45.3704	0.193135
:c4094647-4094000_putative_Mg(2+)_transport_ATPase_[Escherichia_coli_CFT073]	45.3704	0.193135
:c4863610-4863287_hypothetical_protein_c5088_[Escherichia_coli_CFT073]	45.3704	0.193135
:591876-592556_putative_ABC_transporter_ATP-binding_protein_YbbL_[Escherichia_coli_CFT073]	45.3744	0.193337
:c3885306-3884884_chromosome_replication_protein_PioO_[Escherichia_coli_CFT073]	45.3901	0.194109
:c5065957-5065817_hypothetical_protein_c5322_[Escherichia_coli_CFT073]	45.3901	0.194109
:c1814622-1813603_putative_dehydrogenase_[Escherichia_coli_CFT073]	45.3922	0.194213
:4274702-4275886_putative_prophage_integrase_[Escherichia_coli_CFT073]	45.4008	0.194644
:c2138167-2137928_hypothetical_protein_c2322_[Escherichia_coli_CFT073]	45.4167	0.19543
:4043472-4043744_hypothetical_protein_c4259_[Escherichia_coli_CFT073]	45.4212	0.195658
:917799-918104_hypothetical_protein_c0943_[Escherichia_coli_CFT073]	45.4248	0.195836
:1510931-1511161_cation_transport_regulator_[Escherichia_coli_CFT073]	45.4545	0.19732
:1579435-1579599_hypothetical_protein_c1743_[Escherichia_coli_CFT073]	45.4545	0.19732
:491004-491135_hypothetical_protein_c0507_[Escherichia_coli_CFT073]	45.4545	0.19732
:422858-423952_hypothetical_protein_c0435_[Escherichia_coli_CFT073]	45.4795	0.198568
:c391071-390151_hypothetical_protein_c0410_[Escherichia_coli_CFT073]	45.494	0.199301
:c2637564-2636488_glycerophosphodiester_phosphodiesterase_[Escherichia_coli_CFT073]	45.4968	0.199438
:c2776786-2776154_hypothetical_protein_c2911_[Escherichia_coli_CFT073]	45.4976	0.199483
:2978874-2979251_hypothetical_protein_c3104_[Escherichia_coli_CFT073]	45.5026	0.199735
:c4134908-4134720_hypothetical_protein_c4347_[Escherichia_coli_CFT073]	45.5026	0.199735
:336046-337293_hypothetical_protein_c0360_[Escherichia_coli_CFT073]	45.5128	0.200248
:c3346782-3346627_hypothetical_protein_c3486_[Escherichia_coli_CFT073]	45.5128	0.200248
:c3593014-3592859_hypothetical_protein_c3759_[Escherichia_coli_CFT073]	45.5128	0.200248
:1927037-1928251_putative_transport_protein_YdiM_[Escherichia_coli_CFT073]	45.5144	0.200328
:c5195578-5195456_hypothetical_protein_c5449_[Escherichia_coli_CFT073]	45.5285	0.201039
:c2037993-2037355_leucine_export_protein_LeuE_[Escherichia_coli_CFT073]	45.5399	0.201619
:c1626582-1625584_putative_transcriptional_regulator_YcjW_[Escherichia_coli_CFT073]	45.5455	0.201905
:4117880-4118059_hypothetical_protein_c4338_[Escherichia_coli_CFT073]	45.5556	0.202413
:c3991572-3990805_hypothetical_protein_c4205_[Escherichia_coli_CFT073]	45.5729	0.203296
:c954820-954038_arginine-binding_periplasmic_protein_2_[Escherichia_coli_CFT073]	45.5939	0.204365
:2316245-2316472_transposase_[Escherichia_coli_CFT073]	45.614	0.205397
:c1783475-1783191_DNA-binding_transcriptional_regulator_HipB_[Escherichia_coli_CFT073]	45.614	0.205397
:5020049-5020438_hypothetical_protein_c5268_[Escherichia_coli_CFT073]	45.641	0.206783
:1336521-1336934_hypothetical_protein_c1414_[Escherichia_coli_CFT073]	45.6522	0.207357
:4628431-4628568_hypothetical_protein_c4868_[Escherichia_coli_CFT073]	45.6522	0.207357
:999971-1000108_hypothetical_protein_c1036_[Escherichia_coli_CFT073]	45.6522	0.207357
:4587631-4588896_hypothetical_protein_c4823_[Escherichia_coli_CFT073]	45.6556	0.207535
:2862013-2862369_hypothetical_protein_c2998_[Escherichia_coli_CFT073]	45.6583	0.207672
:c2011277-2009850_metabolite_transporter_[Escherichia_coli_CFT073]	45.6583	0.207672
:2029094-2030764_hypothetical_protein_c2191_[Escherichia_coli_CFT073]	45.6613	0.207827
:c4919811-4919569_hypothetical_protein_c5143_[Escherichia_coli_CFT073]	45.679	0.208744
:c864695-864291_hypothetical_protein_c0891_[Escherichia_coli_CFT073]	45.679	0.208744
:3518804-3520042_KpsS_protein_[Escherichia_coli_CFT073]	45.682	0.208898
:c3120951-3120766_hypothetical_protein_c3270_[Escherichia_coli_CFT073]	45.6989	0.209775
:3076191-3076715_hypothetical_protein_c3217_[Escherichia_coli_CFT073]	45.7143	0.210574
:c3879143-3878829_50S_ribosomal_protein_L24_[Escherichia_coli_CFT073]	45.7143	0.210574
:370454-370792_CP4-like_integrase_[Escherichia_coli_CFT073]	45.7227	0.211012
:4059084-4059365_putative_phosphotransferase_system_enzyme_subunit_[Escherichia_coli_CFT073]	45.7447	0.212158
:2936066-2936218_hypothetical_protein_c3064_[Escherichia_coli_CFT073]	45.7516	0.212521
:749807-750265_hypothetical_protein_c0767_[Escherichia_coli_CFT073]	45.7516	0.212521
:c2386482-2385469_chain_length_determinant_protein_[Escherichia_coli_CFT073]	45.7594	0.212926
:c2036489-2036241_hypothetical_protein_c2200_[Escherichia_coli_CFT073]	45.7831	0.214172
:3408019-3409062_ShiA-like_protein_[Escherichia_coli_CFT073]	45.7854	0.214294
:1413562-1413858_putative_regulatory_protein_CII_of_bacteriophage_[Escherichia_coli_CFT073]	45.7912	0.214599
:c2659950-2659654_polymyxin_B_resistance_protein_pmrD_[Escherichia_coli_CFT073]	45.7912	0.214599
:1595709-1596374_putative_transcriptional_repressor_[Escherichia_coli_CFT073]	45.7958	0.214838
:279868-280236_hypothetical_protein_c0298_[Escherichia_coli_CFT073]	45.7995	0.215031
:560411-561058_DNA-binding_transcriptional_repressor_AcrR_[Escherichia_coli_CFT073]	45.8333	0.216819
:c1400430-1400191_hypothetical_protein_c1522_[Escherichia_coli_CFT073]	45.8333	0.216819
:c1643651-1642836_hypothetical_protein_c1810_[Escherichia_coli_CFT073]	45.8333	0.216819
:c1749244-1749029_biofilm-dependent_modulation_protein_[Escherichia_coli_CFT073]	45.8333	0.216819
:c4293117-4291966_transposase_insI_[Escherichia_coli_CFT073]	45.8333	0.216819
:c4495626-4494307_hypothetical_protein_c4727_[Escherichia_coli_CFT073]	45.8333	0.216819
:c4944906-4944172_PapD_protein_[Escherichia_coli_CFT073]	45.8503	0.21772
:425773-426378_ankyrin_repeat-containing_protein_[Escherichia_coli_CFT073]	45.8746	0.219008
:3180005-3181159_hypothetical_protein_c3340_[Escherichia_coli_CFT073]	45.8874	0.219693
:c1158294-1157236_putative_O-methyltransferase_[Escherichia_coli_CFT073]	45.8924	0.219954
:3019963-3020169_DNA-damage-inducible_protein_I_[Escherichia_coli_CFT073]	45.8937	0.220027
:3661949-3662131_hypothetical_protein_c3831_[Escherichia_coli_CFT073]	45.9016	0.22045
:2329640-2330164_putative_transferase_[Escherichia_coli_CFT073]	45.9048	0.220617
:4543132-4543290_hypothetical_protein_c4780_[Escherichia_coli_CFT073]	45.9119	0.221001
:c3302227-3300449_putative_sigma-54-dependent_transcriptional_regulator_ygeV_[Escherichia_coli_CFT073]	45.9247	0.221683
:2362931-2363716_hypothetical_protein_c2524_[Escherichia_coli_CFT073]	45.9288	0.221901
:1423600-1423980_tonB-like_membrane_protein_encoded_within_prophage_[Escherichia_coli_CFT073]	45.9318	0.222062
:5035027-5035518_hypothetical_protein_c5295_[Escherichia_coli_CFT073]	45.935	0.222234
:c2942348-2941365_ABC_transporter_periplasmic-binding_protein_[Escherichia_coli_CFT073]	45.935	0.222234
:3284085-3284552_hypothetical_protein_c3433_[Escherichia_coli_CFT073]	45.9402	0.222514
:3589169-3590515_c4-dicarboxylate_permease_[Escherichia_coli_CFT073]	45.954	0.223256
:158186-158383_hypothetical_protein_c0163_[Escherichia_coli_CFT073]	45.9596	0.223558
:626841-627038_hypothetical_protein_c0646_[Escherichia_coli_CFT073]	45.9596	0.223558
:1574161-1574619_hypothetical_protein_c1738_[Escherichia_coli_CFT073]	45.9695	0.224092
:1685796-1685969_hypothetical_protein_c1845_[Escherichia_coli_CFT073]	45.977	0.224497
:91687-91773_hypothetical_protein_c5493_[Escherichia_coli_CFT073]	45.977	0.224497
:465478-468465_putative_structural_protein_[Escherichia_coli_CFT073]	45.9839	0.224871
:c3489294-3487786_hypothetical_protein_c3652_[Escherichia_coli_CFT073]	45.9907	0.225238
:1180751-1182865_microcin_H47_secretion_ATP-binding_protein_[Escherichia_coli_CFT073]	46.0047	0.225996
:c3794640-3794176_hypothetical_protein_c3975_[Escherichia_coli_CFT073]	46.0215	0.226906
:c4528111-4527206_hypothetical_protein_c4761_[Escherichia_coli_CFT073]	46.0265	0.227176
:2671983-2672486_hypothetical_protein_c2816_[Escherichia_coli_CFT073]	46.0317	0.227462
:53255-53569_putative_toxin_of_gyrase_inhibiting_toxin-antitoxin_system_[Escherichia_coli_CFT073]	46.0317	0.227462
:534-911_hypothetical_protein_c0002_[Escherichia_coli_CFT073]	46.0317	0.227462
:703991-704116_hypothetical_protein_c0723_[Escherichia_coli_CFT073]	46.0317	0.227462
:c2231844-2231467_hypothetical_protein_c2425_[Escherichia_coli_CFT073]	46.0317	0.227462
:c3121573-3121448_hypothetical_protein_c3272_[Escherichia_coli_CFT073]	46.0317	0.227462
:c412372-410042_hypothetical_protein_c0426_[Escherichia_coli_CFT073]	46.0317	0.227462
:c907028-906210_hypothetical_protein_c0929_[Escherichia_coli_CFT073]	46.0317	0.227462
:1507196-1508005_putative_transcriptional_regulator_[Escherichia_coli_CFT073]	46.0494	0.228422
:c2145508-2144786_DNA-binding_transcriptional_activator_SdiA_[Escherichia_coli_CFT073]	46.0581	0.228897
:c2265806-2265084_putative_thioesterase_[Escherichia_coli_CFT073]	46.0581	0.228897
:3061483-3062307_hypothetical_protein_c3201_[Escherichia_coli_CFT073]	46.0606	0.229034
:c1024428-1024264_hypothetical_protein_c1062_[Escherichia_coli_CFT073]	46.0606	0.229034
:c3870885-3870517_hypothetical_protein_c4054_[Escherichia_coli_CFT073]	46.0705	0.229573
:c3051181-3050609_hypothetical_protein_c3181_[Escherichia_coli_CFT073]	46.0733	0.229728
:4391973-4393220_tryptophan_permease_TnaB_[Escherichia_coli_CFT073]	46.0737	0.229751
:1208636-1209145_hypothetical_protein_c1256_[Escherichia_coli_CFT073]	46.0784	0.230009
:1341649-1342158_hypothetical_protein_c1427_[Escherichia_coli_CFT073]	46.0784	0.230009
:5210429-5210938_transposase_[Escherichia_coli_CFT073]	46.0784	0.230009
:542302-542811_hypothetical_protein_c0563_[Escherichia_coli_CFT073]	46.0784	0.230009
:67723-68232_transposase_[Escherichia_coli_CFT073]	46.0784	0.230009
:c2148833-2148324_transposase_[Escherichia_coli_CFT073]	46.0784	0.230009
:c2483740-2483231_transposase_[Escherichia_coli_CFT073]	46.0784	0.230009
:c3330490-3329981_hypothetical_protein_c3468_[Escherichia_coli_CFT073]	46.0784	0.230009
:c4341758-4341555_hypothetical_protein_c4579_[Escherichia_coli_CFT073]	46.0784	0.230009
:c4955349-4953985_transporter_protein_[Escherichia_coli_CFT073]	46.0806	0.230126
:c680632-679826_disulfide_isomerase/thiol-disulfide_oxidase_[Escherichia_coli_CFT073]	46.0967	0.231007
:1419209-1419349_hypothetical_protein_c1558_[Escherichia_coli_CFT073]	46.0993	0.231151
:c4646829-4646689_hypothetical_protein_c4889_[Escherichia_coli_CFT073]	46.0993	0.231151
:1945554-1945772_hypothetical_protein_c2101_[Escherichia_coli_CFT073]	46.1187	0.232219
:c253386-252253_hypothetical_protein_c0261_[Escherichia_coli_CFT073]	46.1199	0.232285
:c3017350-3016874_hypothetical_protein_c3141_[Escherichia_coli_CFT073]	46.1216	0.232377
:c3992285-3991575_hypothetical_protein_c4206_[Escherichia_coli_CFT073]	46.1322	0.232961
:c3640340-3639888_putative_transposase_[Escherichia_coli_CFT073]	46.1369	0.233218
:c145911-145117_S-adenosylmethionine_decarboxylase_[Escherichia_coli_CFT073]	46.1635	0.234691
:c4885415-4884933_PhnA_protein_[Escherichia_coli_CFT073]	46.1698	0.235036
:c448872-447619_galactoside_permease_[Escherichia_coli_CFT073]	46.1722	0.235174
:4712687-4713052_50S_ribosomal_protein_L7/L12_[Escherichia_coli_CFT073]	46.1749	0.235319
:c3552913-3552089_hypothetical_protein_c3719_[Escherichia_coli_CFT073]	46.1818	0.235704
:c301428-300643_putative_deoxyribose_operon_repressor_[Escherichia_coli_CFT073]	46.1832	0.235781
:4163520-4164515_hypothetical_protein_c4381_[Escherichia_coli_CFT073]	46.1847	0.235866
:c2417187-2416441_putative_glycosyl_transferase_[Escherichia_coli_CFT073]	46.1847	0.235866
:c1763291-1760919_hypothetical_protein_c1924_[Escherichia_coli_CFT073]	46.1863	0.235951
:c2059107-2058898_cold_shock-like_protein_CspC_[Escherichia_coli_CFT073]	46.1905	0.236185
:3062408-3062959_hypothetical_protein_c3202_[Escherichia_coli_CFT073]	46.1957	0.236472
:2999854-3000195_translation_inhibitor_protein_RaiA_[Escherichia_coli_CFT073]	46.1988	0.236649
:c3427087-3426785_hypothetical_protein_c3576_[Escherichia_coli_CFT073]	46.2046	0.236971
:88177-89139_leucine_transcriptional_activator_[Escherichia_coli_CFT073]	46.2098	0.237257
:654715-654846_hypothetical_protein_c0670_[Escherichia_coli_CFT073]	46.2121	0.237388
:c23340-23077_30S_ribosomal_protein_S20_[Escherichia_coli_CFT073]	46.2121	0.237388
:c387895-387632_50S_ribosomal_protein_L31_type_B_[Escherichia_coli_CFT073]	46.2121	0.237388
:c702632-702369_hypothetical_protein_c0721_[Escherichia_coli_CFT073]	46.2121	0.237388
:2477452-2477970_hypothetical_protein_c2634_[Escherichia_coli_CFT073]	46.2428	0.239098
:481406-481552_hypothetical_protein_c0497_[Escherichia_coli_CFT073]	46.2585	0.239978
:5035521-5036108_hypothetical_protein_c5296_[Escherichia_coli_CFT073]	46.2585	0.239978
:c3705408-3704419_threonine_dehydratase_[Escherichia_coli_CFT073]	46.2626	0.240209
:1239426-1239935_hypothetical_protein_c1291_[Escherichia_coli_CFT073]	46.2745	0.240876
:1311803-1312312_hypothetical_protein_c1384_[Escherichia_coli_CFT073]	46.2745	0.240876
:192782-193291_transposase_[Escherichia_coli_CFT073]	46.2745	0.240876
:82026-82535_transposase_[Escherichia_coli_CFT073]	46.2745	0.240876
:c2467980-2467471_transposase_[Escherichia_coli_CFT073]	46.2745	0.240876
:c3026897-3026388_hypothetical_protein_c3152_[Escherichia_coli_CFT073]	46.2745	0.240876
:504728-505144_hypothetical_protein_c0520_[Escherichia_coli_CFT073]	46.283	0.241351
:3896437-3896922_putative_general_secretion_pathway_protein_M_[Escherichia_coli_CFT073]	46.2963	0.2421
:2799848-2800240_hypothetical_protein_c2935_[Escherichia_coli_CFT073]	46.3104	0.242897
:c227513-226983_hypothetical_protein_c0233_[Escherichia_coli_CFT073]	46.3277	0.24387
:c1813545-1812178_metabolite_transport_protein_[Escherichia_coli_CFT073]	46.345	0.244851
:c677379-676750_hypothetical_protein_c0689_[Escherichia_coli_CFT073]	46.3492	0.245088
:4294419-4295747_hypothetical_protein_c4509_[Escherichia_coli_CFT073]	46.3506	0.245169
:c1261975-1261400_hypothetical_protein_c1322_[Escherichia_coli_CFT073]	46.3542	0.245369
:5095630-5096082_hypothetical_protein_c5352_[Escherichia_coli_CFT073]	46.3576	0.245565
:115372-115893_hypothetical_protein_c0118_[Escherichia_coli_CFT073]	46.3602	0.245709
:1546826-1547746_oligopeptide_transporter_permease_[Escherichia_coli_CFT073]	46.3626	0.24585
:538341-538739_hypothetical_protein_c0559_[Escherichia_coli_CFT073]	46.3659	0.246036
:4595288-4596637_shikimate_transporter_[Escherichia_coli_CFT073]	46.3704	0.246289
:2073714-2073989_hypothetical_protein_c2246_[Escherichia_coli_CFT073]	46.3768	0.246655
:288649-288786_hypothetical_protein_c0317_[Escherichia_coli_CFT073]	46.3768	0.246655
:c3078663-3078319_hypothetical_protein_c3222_[Escherichia_coli_CFT073]	46.3768	0.246655
:c3026297-3023868_hypothetical_protein_c3150_[Escherichia_coli_CFT073]	46.3786	0.246756
:c3049757-3049260_hypothetical_protein_c3179_[Escherichia_coli_CFT073]	46.3855	0.247151
:240568-241371_2,5-diketo-D-gluconate_reductase_B_[Escherichia_coli_CFT073]	46.393	0.247578
:c1295437-1295063_hypothetical_protein_c1363_[Escherichia_coli_CFT073]	46.4	0.247975
:1452079-1452231_hypothetical_protein_c1602_[Escherichia_coli_CFT073]	46.4052	0.248273
:1955839-1956450_hypothetical_protein_c2114_[Escherichia_coli_CFT073]	46.4052	0.248273
:2921943-2922095_hypothetical_protein_c3045_[Escherichia_coli_CFT073]	46.4052	0.248273
:c2031463-2031311_hypothetical_protein_c2193_[Escherichia_coli_CFT073]	46.4052	0.248273
:2034819-2035973_hypothetical_protein_c2199_[Escherichia_coli_CFT073]	46.4069	0.24837
:c3464731-3463394_IucD_protein_[Escherichia_coli_CFT073]	46.4126	0.248691
:c999839-999114_hypothetical_protein_c1034_[Escherichia_coli_CFT073]	46.4187	0.249044
:2213329-2213733_DNA-binding_protein_H-NS_[Escherichia_coli_CFT073]	46.4198	0.249102
:4095740-4096312_acid-resistance_membrane_protein_[Escherichia_coli_CFT073]	46.4223	0.24925
:4620147-4620314_hypothetical_protein_c4858_[Escherichia_coli_CFT073]	46.4286	0.249607
:5020279-5020446_hypothetical_protein_c5269_[Escherichia_coli_CFT073]	46.4286	0.249607
:c175178-175011_hypothetical_protein_c0182_[Escherichia_coli_CFT073]	46.4286	0.249607
:c3121996-3121577_hypothetical_protein_c3273_[Escherichia_coli_CFT073]	46.4286	0.249607
:1048663-1049700_dihydroorotate_dehydrogenase_2_[Escherichia_coli_CFT073]	46.4355	0.25
:c880923-880108_hypothetical_protein_c0907_[Escherichia_coli_CFT073]	46.4461	0.250609
:4965775-4965957_hypothetical_protein_c5212_[Escherichia_coli_CFT073]	46.4481	0.250724
:c2036819-2036637_hypothetical_protein_c2202_[Escherichia_coli_CFT073]	46.4481	0.250724
:c5122040-5120028_hypothetical_protein_c5373_[Escherichia_coli_CFT073]	46.4481	0.250724
:4181289-4181753_hypothetical_protein_c4397_[Escherichia_coli_CFT073]	46.4516	0.250927
:3509372-3509767_hypothetical_protein_c3681_[Escherichia_coli_CFT073]	46.4646	0.251675
:c2368931-2368536_hypothetical_protein_c2534_[Escherichia_coli_CFT073]	46.4646	0.251675
:c553940-553431_hypothetical_protein_c0576_[Escherichia_coli_CFT073]	46.4706	0.252017
:c1654634-1653501_outer_membrane_protein_N_[Escherichia_coli_CFT073]	46.4727	0.252136
:c458004-457480_putative_transferase_[Escherichia_coli_CFT073]	46.4762	0.252339
:c5038210-5036933_hexuronate_transporter_[Escherichia_coli_CFT073]	46.4789	0.252493
:c1556814-1556275_intracellular_septation_protein_A_[Escherichia_coli_CFT073]	46.4815	0.252643
:4835121-4835249_hypothetical_protein_c5059_[Escherichia_coli_CFT073]	46.5116	0.254382
:c1611756-1611499_hypothetical_protein_c1776_[Escherichia_coli_CFT073]	46.5116	0.254382
:4318098-4319015_putative_pyruvate_formate-lyase_3_activating_enzyme_[Escherichia_coli_CFT073]	46.5142	0.254529
:c2403150-2401756_putative_colanic_acid_biosynthesis_protein_[Escherichia_coli_CFT073]	46.5233	0.255057
:697148-697708_palmitoyl_transferase_[Escherichia_coli_CFT073]	46.5241	0.255101
:3776329-3776904_hypothetical_protein_c3959_[Escherichia_coli_CFT073]	46.5278	0.255316
:c281313-281170_hypothetical_protein_c0303_[Escherichia_coli_CFT073]	46.5278	0.255316
:c3907840-3907106_hypothetical_protein_c4120_[Escherichia_coli_CFT073]	46.5306	0.255481
:4020033-4020191_hypothetical_protein_c4230_[Escherichia_coli_CFT073]	46.5409	0.256076
:4276297-4277340_ShiA-like_protein_[Escherichia_coli_CFT073]	46.5517	0.256705
:c1972400-1970994_6-phospho-beta-glucosidase_[Escherichia_coli_CFT073]	46.5529	0.256776
:4321953-4322141_hypothetical_protein_c4544_[Escherichia_coli_CFT073]	46.5608	0.257235
:1700015-1700218_hypothetical_protein_c1862_[Escherichia_coli_CFT073]	46.5686	0.257687
:c4328895-4327831_hypothetical_protein_c4551_[Escherichia_coli_CFT073]	46.5728	0.257928
:c2923232-2922456_enhanced_serine_sensitivity_protein_SseB_[Escherichia_coli_CFT073]	46.5894	0.2589
:481473-482150_hypothetical_protein_c0498_[Escherichia_coli_CFT073]	46.6077	0.259964
:c3284073-3283735_transposase_[Escherichia_coli_CFT073]	46.6077	0.259964
:c3415413-3414691_putative_response_regulator_[Escherichia_coli_CFT073]	46.6113	0.260178
:c2885902-2883659_hypothetical_protein_c3021_[Escherichia_coli_CFT073]	46.6132	0.260287
:c4299658-4298906_hypothetical_protein_c4513_[Escherichia_coli_CFT073]	46.6135	0.260307
:914250-915107_DNA_adenine_methylase_[Escherichia_coli_CFT073]	46.62	0.260688
:c2670770-2669028_hypothetical_protein_c2813_[Escherichia_coli_CFT073]	46.6437	0.262075
:c4239125-4238067_lipopolysaccharide_core_biosynthesis_protein_[Escherichia_coli_CFT073]	46.6478	0.262313
:1287948-1288322_hypothetical_protein_c1354_[Escherichia_coli_CFT073]	46.6667	0.263423
:3351564-3351893_Z-ring-associated_protein_[Escherichia_coli_CFT073]	46.6667	0.263423
:3865057-3865566_peptide_deformylase_[Escherichia_coli_CFT073]	46.6667	0.263423
:3960691-3960870_hypothetical_protein_c4177_[Escherichia_coli_CFT073]	46.6667	0.263423
:4062290-4062559_putative_phosphocarrier_protein_[Escherichia_coli_CFT073]	46.6667	0.263423
:4434384-4434803_D-ribose_pyranase_[Escherichia_coli_CFT073]	46.6667	0.263423
:473308-473442_hypothetical_protein_c0485_[Escherichia_coli_CFT073]	46.6667	0.263423
:c1402817-1402488_hypothetical_protein_c1528_[Escherichia_coli_CFT073]	46.6667	0.263423
:c1878924-1878595_lysozyme_inhibitor_[Escherichia_coli_CFT073]	46.6667	0.263423
:c1911281-1911072_hypothetical_protein_c2069_[Escherichia_coli_CFT073]	46.6667	0.263423
:c2127658-2127299_transcriptional_activator_FlhD_[Escherichia_coli_CFT073]	46.6667	0.263423
:c2461777-2460998_hypothetical_protein_c2615_[Escherichia_coli_CFT073]	46.6667	0.263423
:c3571378-3570854_hypothetical_protein_c3738_[Escherichia_coli_CFT073]	46.6667	0.263423
:c3898370-3898176_bacterioferritin-associated_ferredoxin_[Escherichia_coli_CFT073]	46.6667	0.263423
:c4204052-4203843_hypothetical_protein_c4419_[Escherichia_coli_CFT073]	46.6667	0.263423
:c803204-802905_hypothetical_protein_c0824_[Escherichia_coli_CFT073]	46.6667	0.263423
:c1760874-1758079_zinc_protease_pqqL_[Escherichia_coli_CFT073]	46.6738	0.263844
:2333984-2334949_hypothetical_protein_c2494_[Escherichia_coli_CFT073]	46.6874	0.264643
:c612748-611963_hypothetical_protein_c0629_[Escherichia_coli_CFT073]	46.6921	0.264923
:308229-309260_hypothetical_protein_c0337_[Escherichia_coli_CFT073]	46.7054	0.265709
:36926-37321_DNA-binding_transcriptional_activator_CaiF_[Escherichia_coli_CFT073]	46.7172	0.266404
:c1780418-1779636_hypothetical_protein_c1937_[Escherichia_coli_CFT073]	46.7433	0.267952
:c2016063-2015020_hypothetical_protein_c2178_[Escherichia_coli_CFT073]	46.7433	0.267952
:4704305-4705333_UDP-N-acetylenolpyruvoylglucosamine_reductase_[Escherichia_coli_CFT073]	46.7444	0.268018
:4603350-4603595_hypothetical_protein_c4840_[Escherichia_coli_CFT073]	46.748	0.268229
:2252162-2252638_hypothetical_protein_c2440_[Escherichia_coli_CFT073]	46.7505	0.268381
:4977698-4978174_FxsA_[Escherichia_coli_CFT073]	46.7505	0.268381
:4908738-4908968_hypothetical_protein_c5133_[Escherichia_coli_CFT073]	46.7532	0.268543
:c3218014-3217784_lipoprotein_ygdI_[Escherichia_coli_CFT073]	46.7532	0.268543
:426418-427281_hypothetical_protein_c0440_[Escherichia_coli_CFT073]	46.7593	0.2689
:3625228-3627750_outer_membrane_usher_protein_yqiG_[Escherichia_coli_CFT073]	46.7697	0.269522
:2451725-2452096_hypothetical_protein_c2606_[Escherichia_coli_CFT073]	46.7742	0.269789
:1308644-1309186_hypothetical_protein_c1381_[Escherichia_coli_CFT073]	46.7772	0.269966
:1192814-1193341_F1C_minor_fimbrial_subunit_F_[Escherichia_coli_CFT073]	46.7803	0.270153
:c2075382-2075041_hypothetical_protein_c2249_[Escherichia_coli_CFT073]	46.7836	0.270351
:3234670-3235494_hypothetical_protein_c3394_[Escherichia_coli_CFT073]	46.7879	0.270604
:c433381-433226_hypothetical_protein_c0446_[Escherichia_coli_CFT073]	46.7949	0.271022
:1694048-1694641_tellurite_resistance_protein_TehB_[Escherichia_coli_CFT073]	46.8013	0.271408
:3843039-3843335_DNA-binding_protein_Fis_[Escherichia_coli_CFT073]	46.8013	0.271408
:c1379535-1379395_hypothetical_protein_c1486_[Escherichia_coli_CFT073]	46.8085	0.271836
:c3933921-3933529_hypothetical_protein_c4148_[Escherichia_coli_CFT073]	46.8193	0.272484
:2886756-2887274_lipoprotein_yfgH_[Escherichia_coli_CFT073]	46.8208	0.272572
:1348481-1348606_hypothetical_protein_c1443_[Escherichia_coli_CFT073]	46.8254	0.272847
:c3414690-3413218_hypothetical_protein_c3564_[Escherichia_coli_CFT073]	46.8432	0.273913
:304007-305020_putative_cytoplasmic_protein_[Escherichia_coli_CFT073]	46.8442	0.273973
:3659947-3660153_hypothetical_protein_c3827_[Escherichia_coli_CFT073]	46.8599	0.274917
:1348728-1349237_prophage_Qin_DNA_packaging_protein_NU1-like_protein_[Escherichia_coli_CFT073]	46.8627	0.275088
:780775-780966_hypothetical_protein_c0797_[Escherichia_coli_CFT073]	46.875	0.275826
:1816891-1817451_spermidine_N(1)-acetyltransferase_[Escherichia_coli_CFT073]	46.8806	0.276161
:1635277-1636176_putative_transcriptional_regulator_YcjZ_[Escherichia_coli_CFT073]	46.8889	0.276662
:1714907-1715083_hypothetical_protein_c1879_[Escherichia_coli_CFT073]	46.8927	0.27689
:1313301-1313558_hypothetical_protein_c1386_[Escherichia_coli_CFT073]	46.8992	0.277286
:2560514-2561080_putative_outer_membrane_lipoprotein_[Escherichia_coli_CFT073]	46.9136	0.278153
:c2777675-2777433_hypothetical_protein_c2914_[Escherichia_coli_CFT073]	46.9136	0.278153
:c678572-677352_hypothetical_protein_c0690_[Escherichia_coli_CFT073]	46.9287	0.279071
:3373532-3374266_hypothetical_protein_c3517_[Escherichia_coli_CFT073]	46.9388	0.279679
:c2150448-2149861_flagella_biosynthesis_protein_FliZ_[Escherichia_coli_CFT073]	46.9388	0.279679
:c4713178-4712672_hypothetical_protein_c4942_[Escherichia_coli_CFT073]	46.9428	0.279923
:2174662-2175447_flagellar_biosynthesis_protein_FliR_[Escherichia_coli_CFT073]	46.9466	0.280151
:1371055-1371333_hypothetical_protein_c1470_[Escherichia_coli_CFT073]	46.9534	0.280566
:1239076-1239273_hypothetical_protein_c1290_[Escherichia_coli_CFT073]	46.9697	0.281556
:1536428-1537336_UTP--glucose-1-phosphate_uridylyltransferase_subunit_GalU_[Escherichia_coli_CFT073]	46.9747	0.28186
:5064282-5065754_hypothetical_protein_c5321_[Escherichia_coli_CFT073]	46.979	0.282119
:2603099-2603794_transcriptional_regulator_RcsB_[Escherichia_coli_CFT073]	46.9828	0.282351
:c1121025-1119700_N-glycosyltransferase_[Escherichia_coli_CFT073]	46.9834	0.282391
:3808967-3809281_hypothetical_protein_c3993_[Escherichia_coli_CFT073]	46.9841	0.282434
:c1125468-1123045_outer_membrane_protein_PgaA_[Escherichia_coli_CFT073]	46.9884	0.282698
:4632625-4632924_hypothetical_protein_c4874_[Escherichia_coli_CFT073]	47	0.283402
:c4163345-4163046_hypothetical_protein_c4380_[Escherichia_coli_CFT073]	47	0.283402
:3438457-3438690_PapI_protein_[Escherichia_coli_CFT073]	47.0085	0.283924
:c4344787-4343969_cytoplasmic_membrane_lipoprotein-28_[Escherichia_coli_CFT073]	47.0085	0.283924
:4169834-4171375_xylose_transporter_ATP-binding_subunit_[Escherichia_coli_CFT073]	47.0169	0.284432
:1062260-1062712_hypothetical_protein_c1092_[Escherichia_coli_CFT073]	47.0199	0.284615
:4935304-4935522_hypothetical_protein_c5173_[Escherichia_coli_CFT073]	47.032	0.285355
:1987198-1987956_hypothetical_protein_c2151_[Escherichia_coli_CFT073]	47.0356	0.285576
:c5110103-5109075_L-idonate_regulatory_protein_[Escherichia_coli_CFT073]	47.036	0.2856
:c529065-528643_hypothetical_protein_c0549_[Escherichia_coli_CFT073]	47.0449	0.286149
:c2206221-2205646_hypothetical_protein_c2401_[Escherichia_coli_CFT073]	47.0486	0.286375
:c1534103-1533645_hypothetical_protein_c1697_[Escherichia_coli_CFT073]	47.0588	0.287002
:c5020517-5020365_hypothetical_protein_c5271_[Escherichia_coli_CFT073]	47.0588	0.287002
:c976749-976495_stationary_phase/starvation_inducible_regulatory_protein_CspD_[Escherichia_coli_CFT073]	47.0588	0.287002
:1131407-1131799_hypothetical_protein_c1168_[Escherichia_coli_CFT073]	47.0738	0.287921
:1195131-1195871_hypothetical_protein_c1246_[Escherichia_coli_CFT073]	47.0985	0.289443
:c1646507-1645215_hypothetical_protein_c1815_[Escherichia_coli_CFT073]	47.0998	0.28952
:3399952-3400227_hypothetical_protein_c3550_[Escherichia_coli_CFT073]	47.1014	0.289624
:c1537893-1537480_global_DNA-binding_transcriptional_dual_regulator_H-NS_[Escherichia_coli_CFT073]	47.1014	0.289624
:c355404-355267_hypothetical_protein_c0375_[Escherichia_coli_CFT073]	47.1014	0.289624
:c5032858-5032583_hypothetical_protein_c5289_[Escherichia_coli_CFT073]	47.1014	0.289624
:4992518-4994062_putative_transporter_YjeM_[Escherichia_coli_CFT073]	47.1197	0.290752
:475431-475691_hypothetical_protein_c0489_[Escherichia_coli_CFT073]	47.1264	0.291166
:c87537-87451_leu_operon_leader_peptide_[Escherichia_coli_CFT073]	47.1264	0.291166
:c1653432-1652926_hypothetical_protein_c1821_[Escherichia_coli_CFT073]	47.14	0.292007
:1169460-1169669_entry_exclusion_protein_2_[Escherichia_coli_CFT073]	47.1429	0.292181
:1886218-1886340_hypothetical_protein_c2041_[Escherichia_coli_CFT073]	47.1545	0.2929
:74011-74133_hypothetical_protein_c0077_[Escherichia_coli_CFT073]	47.1545	0.2929
:c4775920-4775798_hypothetical_protein_c5000_[Escherichia_coli_CFT073]	47.1545	0.2929
:3179067-3179990_hypothetical_protein_c3338_[Escherichia_coli_CFT073]	47.1861	0.294866
:c1496459-1496229_hypothetical_protein_c1660_[Escherichia_coli_CFT073]	47.1861	0.294866
:1421893-1422390_lysozyme_from_lambdoid_prophage_DLP12_[Escherichia_coli_CFT073]	47.1888	0.295028
:c4504708-4503944_hypothetical_protein_c4736_[Escherichia_coli_CFT073]	47.1895	0.295077
:2315404-2315670_transposase_[Escherichia_coli_CFT073]	47.191	0.295169
:c1240752-1240486_hypothetical_protein_c1293_[Escherichia_coli_CFT073]	47.191	0.295169
:c1899380-1898739_riboflavin_synthase_subunit_alpha_[Escherichia_coli_CFT073]	47.1963	0.295495
:c4657559-4656435_hypothetical_protein_c4897_[Escherichia_coli_CFT073]	47.2	0.295728
:c2153284-2151497_flagellin_[Escherichia_coli_CFT073]	47.2036	0.295951
:c4348661-4347249_hypothetical_protein_c4588_[Escherichia_coli_CFT073]	47.2045	0.29601
:c1783197-1781779_protein_hipA_[Escherichia_coli_CFT073]	47.2163	0.296746
:1865472-1865687_oriC-binding_nucleoid-associated_protein_[Escherichia_coli_CFT073]	47.2222	0.297113
:3460499-3460642_hypothetical_protein_c3622_[Escherichia_coli_CFT073]	47.2222	0.297113
:376600-376815_insertion_element_IS1_1/2/3/5/6_protein_insA_[Escherichia_coli_CFT073]	47.2222	0.297113
:4909988-4910131_hypothetical_protein_c5137_[Escherichia_coli_CFT073]	47.2222	0.297113
:c1574979-1574728_hypothetical_protein_c1739_[Escherichia_coli_CFT073]	47.2222	0.297113
:1568347-1570239_hypothetical_protein_c1733_[Escherichia_coli_CFT073]	47.2266	0.297387
:5136769-5137365_tyrosine_recombinase_[Escherichia_coli_CFT073]	47.2362	0.297984
:1903270-1904880_hypothetical_protein_c2060_[Escherichia_coli_CFT073]	47.2377	0.298081
:c5184836-5183931_hypothetical_protein_c5436_[Escherichia_coli_CFT073]	47.2406	0.298261
:c2214177-2213797_hypothetical_protein_c2412_[Escherichia_coli_CFT073]	47.2441	0.298478
:c2748690-2747815_hypothetical_protein_c2894_[Escherichia_coli_CFT073]	47.2603	0.29949
:c4811120-4810920_hypothetical_protein_c5033_[Escherichia_coli_CFT073]	47.2637	0.299704
:c1858561-1857794_7-alpha-hydroxysteroid_dehydrogenase_[Escherichia_coli_CFT073]	47.2656	0.299825
:c2760023-2759070_DNA-binding_transcriptional_regulator_DsdC_[Escherichia_coli_CFT073]	47.2746	0.30039
:c1412849-1412427_repressor_protein_[Escherichia_coli_CFT073]	47.2813	0.300809
:c270640-269537_hypothetical_protein_c0290_[Escherichia_coli_CFT073]	47.2826	0.30089
:c453999-453448_hypothetical_protein_c0463_[Escherichia_coli_CFT073]	47.2826	0.30089
:606435-607889_allantoin_permease_[Escherichia_coli_CFT073]	47.2852	0.301054
:c4304158-4304030_hypothetical_protein_c4519_[Escherichia_coli_CFT073]	47.2868	0.301154
:c910363-909332_integrase_for_prophage_[Escherichia_coli_CFT073]	47.2868	0.301154
:c945128-944871_glutaredoxin_1_[Escherichia_coli_CFT073]	47.2868	0.301154
:2743260-2744606_long-chain_fatty_acid_outer_membrane_transporter_[Escherichia_coli_CFT073]	47.2903	0.301371
:2543394-2544482_hypothetical_protein_c2695_[Escherichia_coli_CFT073]	47.2911	0.301422
:3854205-3854963_amino-acid_ABC_transporter_ATP-binding_protein_YhdZ_[Escherichia_coli_CFT073]	47.2991	0.301924
:1545037-1546740_periplasmic_oligopeptide-binding_protein_[Escherichia_coli_CFT073]	47.3005	0.302011
:c1510748-1509561_calcium/sodium:proton_antiporter_[Escherichia_coli_CFT073]	47.3064	0.302384
:622989-623675_hypothetical_protein_c0640_[Escherichia_coli_CFT073]	47.3071	0.30243
:c2732147-2731275_hypothetical_protein_c2878_[Escherichia_coli_CFT073]	47.3081	0.302493
:453388-453945_hypothetical_protein_c0462_[Escherichia_coli_CFT073]	47.3118	0.302726
:c2774338-2772644_putative_oxalyl-CoA_decarboxylase_[Escherichia_coli_CFT073]	47.3156	0.302965
:c1842725-1842390_hypothetical_protein_c1999_[Escherichia_coli_CFT073]	47.3214	0.30333
:c4073678-4073343_universal_stress_protein_UspB_[Escherichia_coli_CFT073]	47.3214	0.30333
:c4575610-4575461_hypothetical_protein_c4811_[Escherichia_coli_CFT073]	47.3333	0.30408
:1240069-1240896_hypothetical_protein_c1292_[Escherichia_coli_CFT073]	47.343	0.304689
:c2474332-2473505_hypothetical_protein_c2629_[Escherichia_coli_CFT073]	47.343	0.304689
:c4369158-4368745_heat_shock_protein_IbpA_[Escherichia_coli_CFT073]	47.343	0.304689
:c1100760-1100533_hypothetical_protein_c1139_[Escherichia_coli_CFT073]	47.3684	0.306295
:c1333330-1333160_hypothetical_protein_c1408_[Escherichia_coli_CFT073]	47.3684	0.306295
:c2745619-2745449_hypothetical_protein_c2891_[Escherichia_coli_CFT073]	47.3684	0.306295
:2671062-2671880_hypothetical_protein_c2815_[Escherichia_coli_CFT073]	47.3748	0.306701
:3586610-3587620_ureidoglycolate_dehydrogenase_[Escherichia_coli_CFT073]	47.3788	0.306954
:c5113343-5112312_L-idonate_5-dehydrogenase_[Escherichia_coli_CFT073]	47.3837	0.307263
:c1853365-1852100_putative_outer_membrane_porin_protein_[Escherichia_coli_CFT073]	47.3934	0.307874
:3579568-3580221_hypothetical_protein_c3747_[Escherichia_coli_CFT073]	47.4006	0.308333
:c506904-506365_hypothetical_protein_c0522_[Escherichia_coli_CFT073]	47.4074	0.308765
:2650936-2651361_putative_Nudix_hydrolase_yfaO_[Escherichia_coli_CFT073]	47.4178	0.309427
:c1085916-1085704_cold_shock-like_protein_cspH_[Escherichia_coli_CFT073]	47.4178	0.309427
:c1400824-1400456_hypothetical_protein_c1523_[Escherichia_coli_CFT073]	47.4255	0.309912
:1466844-1467290_hypothetical_protein_c1629_[Escherichia_coli_CFT073]	47.4273	0.310028
:947284-947808_hypothetical_protein_c0986_[Escherichia_coli_CFT073]	47.4286	0.310109
:c4110639-4110037_putative_transcriptional_regulator_YhjB_[Escherichia_coli_CFT073]	47.4295	0.310169
:1413891-1414790_putative_replication_protein_O_of_bacteriophage_[Escherichia_coli_CFT073]	47.4444	0.311119
:22082-22981_transcriptional_activator_NhaR_[Escherichia_coli_CFT073]	47.4444	0.311119
:c3879944-3879690_30S_ribosomal_protein_S17_[Escherichia_coli_CFT073]	47.451	0.311535
:377117-377293_InsB_protein_[Escherichia_coli_CFT073]	47.4576	0.311958
:c2370766-2370293_DNA_gyrase_inhibitor_[Escherichia_coli_CFT073]	47.4684	0.312643
:3970061-3970654_hypothetical_protein_c4188_[Escherichia_coli_CFT073]	47.4747	0.313051
:c2078851-2078456_hypothetical_protein_c2255_[Escherichia_coli_CFT073]	47.4747	0.313051
:c4062514-4062119_hypothetical_protein_c4281_[Escherichia_coli_CFT073]	47.4747	0.313051
:c2775642-2774392_formyl-coenzyme_A_transferase_[Escherichia_coli_CFT073]	47.482	0.313515
:2076697-2077014_DNA_polymerase_III_subunit_theta_[Escherichia_coli_CFT073]	47.4843	0.313659
:2782748-2783503_hypothetical_protein_c2920_[Escherichia_coli_CFT073]	47.4868	0.313819
:c4915520-4913367_lysine_decarboxylase,_inducible_[Escherichia_coli_CFT073]	47.493	0.314219
:1931556-1933151_hypothetical_protein_c2089_[Escherichia_coli_CFT073]	47.4937	0.314264
:2315775-2316254_transposase_[Escherichia_coli_CFT073]	47.5	0.314664
:c1168702-1168463_Cea_protein_[Escherichia_coli_CFT073]	47.5	0.314664
:c413142-412381_hypothetical_protein_c0427_[Escherichia_coli_CFT073]	47.5066	0.315084
:c307958-307515_PTS_system,_mannitol_(Cryptic)-specific_IIA_component_[Escherichia_coli_CFT073]	47.5225	0.316107
:1074172-1074474_hypothetical_protein_c1108_[Escherichia_coli_CFT073]	47.5248	0.31625
:1543724-1544371_hypothetical_protein_c1706_[Escherichia_coli_CFT073]	47.5309	0.316642
:802857-803060_hypothetical_protein_c0823_[Escherichia_coli_CFT073]	47.549	0.317807
:c3812816-3812613_hypothetical_protein_c3997_[Escherichia_coli_CFT073]	47.549	0.317807
:3165921-3166370_putative_6-pyruvoyl_tetrahydrobiopterin_synthase_[Escherichia_coli_CFT073]	47.5556	0.318227
:c1609188-1608943_hypothetical_protein_c1772_[Escherichia_coli_CFT073]	47.561	0.318576
:1372554-1372820_hypothetical_protein_c1475_[Escherichia_coli_CFT073]	47.5655	0.31887
:c307499-307212_hypothetical_protein_c0335_[Escherichia_coli_CFT073]	47.5694	0.319121
:3584078-3585586_oxidoreductase_ydfI_[Escherichia_coli_CFT073]	47.5812	0.319877
:3585583-3586599_hypothetical_protein_c3752_[Escherichia_coli_CFT073]	47.591	0.320507
:c648241-646994_hypothetical_protein_c0663_[Escherichia_coli_CFT073]	47.5962	0.320842
:3627757-3628506_fimbrial_chaperone_yqiH_[Escherichia_coli_CFT073]	47.6	0.32109
:3209102-3210418_L-fucose_transporter_[Escherichia_coli_CFT073]	47.6082	0.321619
:2643289-2643414_hypothetical_protein_c2785_[Escherichia_coli_CFT073]	47.619	0.32232
:3555986-3556678_ATP-binding_protein_yghT_[Escherichia_coli_CFT073]	47.619	0.32232
:3714321-3714656_putative_regulator_PrlF_[Escherichia_coli_CFT073]	47.619	0.32232
:4985274-4985420_entericidin_B_membrane_lipoprotein_[Escherichia_coli_CFT073]	47.619	0.32232
:944464-944841_hypothetical_protein_c0981_[Escherichia_coli_CFT073]	47.619	0.32232
:c1391340-1390669_DNA-binding_transcriptional_regulator_PhoP_[Escherichia_coli_CFT073]	47.619	0.32232
:c2179895-2179707_hypothetical_protein_c2375_[Escherichia_coli_CFT073]	47.619	0.32232
:c2476468-2476196_hypothetical_protein_c2632_[Escherichia_coli_CFT073]	47.619	0.32232
:c3197137-3197012_hypothetical_protein_c3354_[Escherichia_coli_CFT073]	47.619	0.32232
:c683825-683364_hypothetical_protein_c0696_[Escherichia_coli_CFT073]	47.619	0.32232
:c4911614-4910097_lysyl-tRNA_synthetase_[Escherichia_coli_CFT073]	47.6285	0.322929
:c228423-227599_hypothetical_protein_c0234_[Escherichia_coli_CFT073]	47.6364	0.32344
:c4174722-4173898_hypothetical_protein_c4390_[Escherichia_coli_CFT073]	47.6364	0.32344
:2816727-2817236_PTS_system_glucose-specific_transporter_subunit_[Escherichia_coli_CFT073]	47.6471	0.324133
:3690546-3690950_hypothetical_protein_c3859_[Escherichia_coli_CFT073]	47.6543	0.324603
:c12574-12170_hypothetical_protein_c0017_[Escherichia_coli_CFT073]	47.6543	0.324603
:3688950-3689333_hypothetical_protein_c3855_[Escherichia_coli_CFT073]	47.6562	0.324728
:c649464-649081_hypothetical_protein_c0665_[Escherichia_coli_CFT073]	47.6562	0.324728
:c3999624-3998920_putative_major_fimbrial_subunit_[Escherichia_coli_CFT073]	47.6596	0.324944
:c702268-701627_lipoate-protein_ligase_B_[Escherichia_coli_CFT073]	47.6636	0.325202
:4314503-4314802_hypothetical_protein_c4535_[Escherichia_coli_CFT073]	47.6667	0.325404
:5182087-5183760_putative_Na(+)/H(+)_exchanger_yjcE_[Escherichia_coli_CFT073]	47.6703	0.325636
:c1329379-1329101_putative_excisionase_for_prophage_[Escherichia_coli_CFT073]	47.6703	0.325636
:986723-987217_leucine-responsive_transcriptional_regulator_[Escherichia_coli_CFT073]	47.6768	0.326059
:c623495-623001_peptidyl-prolyl_cis-trans_isomerase_B_(rotamase_B)_[Escherichia_coli_CFT073]	47.6768	0.326059
:1709348-1709584_hypothetical_protein_c1874_[Escherichia_coli_CFT073]	47.6793	0.326226
:4657686-4659245_hypothetical_protein_c4898_[Escherichia_coli_CFT073]	47.6923	0.327069
:5198259-5198411_hypothetical_protein_c5455_[Escherichia_coli_CFT073]	47.7124	0.328378
:c1405668-1405210_hypothetical_protein_c1531_[Escherichia_coli_CFT073]	47.7124	0.328378
:c855393-855088_hypothetical_protein_c0882_[Escherichia_coli_CFT073]	47.7124	0.328378
:c1785492-1784527_hypothetical_protein_c1943_[Escherichia_coli_CFT073]	47.7226	0.329039
:1166202-1166597_hypothetical_protein_c1209_[Escherichia_coli_CFT073]	47.7273	0.329346
:c4503861-4502959_hypothetical_protein_c4735_[Escherichia_coli_CFT073]	47.7298	0.32951
:c2798929-2796680_hypothetical_protein_c2933_[Escherichia_coli_CFT073]	47.7333	0.329741
:c1266830-1266213_hypothetical_protein_c1330_[Escherichia_coli_CFT073]	47.7346	0.329826
:4058602-4059087_putative_phosphotransferase_system_enzyme_subunit_[Escherichia_coli_CFT073]	47.7366	0.329956
:4949723-4949944_PapI_protein_[Escherichia_coli_CFT073]	47.7477	0.330682
:c3910180-3909980_hypothetical_protein_c4124_[Escherichia_coli_CFT073]	47.7612	0.331561
:c2109685-2108585_cytochrome_c-type_protein_torY_[Escherichia_coli_CFT073]	47.7748	0.332447
:1064926-1065555_hypothetical_protein_c1096_[Escherichia_coli_CFT073]	47.7778	0.332646
:4694175-4694534_hypothetical_protein_c4927_[Escherichia_coli_CFT073]	47.7778	0.332646
:c4969685-4967922_hypothetical_protein_c5215_[Escherichia_coli_CFT073]	47.7891	0.333388
:c1659495-1659061_heat-inducible_protein_[Escherichia_coli_CFT073]	47.8161	0.335157
:c1881353-1880919_transcriptional_regulator_SlyA_[Escherichia_coli_CFT073]	47.8161	0.335157
:c1956498-1956064_translation_initiation_factor_IF-3_[Escherichia_coli_CFT073]	47.8161	0.335157
:2334952-2335986_putative_phosphotriesterase-related_protein_[Escherichia_coli_CFT073]	47.8261	0.335814
:c10672-10535_hypothetical_protein_c0014_[Escherichia_coli_CFT073]	47.8261	0.335814
:c554568-554017_maltose_O-acetyltransferase_[Escherichia_coli_CFT073]	47.8261	0.335814
:c1154577-1153219_hypothetical_protein_c1197_[Escherichia_coli_CFT073]	47.8293	0.336024
:c4236962-4236156_lipopolysaccharide_core_biosynthesis_protein_rfaP_[Escherichia_coli_CFT073]	47.8315	0.336168
:c3156545-3156222_hypothetical_protein_c3316_[Escherichia_coli_CFT073]	47.8395	0.336696
:c1037770-1036682_outer_membrane_protein_F_[Escherichia_coli_CFT073]	47.8421	0.336864
:c652457-651687_phosphopantetheinyltransferase_component_of_enterobactin_synthase_multienzyme_complex_[Escherichia_coli_CFT073]	47.8599	0.33804
:1897551-1898699_cyclopropane_fatty_acyl_phospholipid_synthase_[Escherichia_coli_CFT073]	47.8677	0.338553
:c5094955-5093732_arginine_deiminase_[Escherichia_coli_CFT073]	47.8758	0.339088
:2005959-2006123_hypothetical_protein_c2169_[Escherichia_coli_CFT073]	47.8788	0.339284
:4248760-4249584_DNA-damage-inducible_protein_D_[Escherichia_coli_CFT073]	47.8788	0.339284
:c1551077-1550748_dsDNA-mimic_protein_[Escherichia_coli_CFT073]	47.8788	0.339284
:c2074649-2073990_serine/threonine_protein_phosphatase_1_[Escherichia_coli_CFT073]	47.8788	0.339284
:c2695098-2694604_hypothetical_protein_c2835_[Escherichia_coli_CFT073]	47.8788	0.339284
:c2716541-2715882_hypothetical_protein_c2862_[Escherichia_coli_CFT073]	47.8788	0.339284
:5161353-5162273_hypothetical_protein_c5420_[Escherichia_coli_CFT073]	47.8827	0.339544
:1781157-1781609_hypothetical_protein_c1939_[Escherichia_coli_CFT073]	47.9029	0.340874
:1007722-1008414_hypothetical_protein_c1044_[Escherichia_coli_CFT073]	47.9076	0.341189
:3214225-3214965_DNA-binding_transcriptional_activator_FucR_[Escherichia_coli_CFT073]	47.9082	0.341228
:c1692935-1691955_hypothetical_protein_c1852_[Escherichia_coli_CFT073]	47.9103	0.341365
:c553273-551717_hypothetical_protein_c0575_[Escherichia_coli_CFT073]	47.9127	0.34152
:334492-334875_hypothetical_protein_c0357_[Escherichia_coli_CFT073]	47.9167	0.341786
:c1252629-1252486_hypothetical_protein_c1312_[Escherichia_coli_CFT073]	47.9167	0.341786
:c2060438-2060295_hypothetical_protein_c2234_[Escherichia_coli_CFT073]	47.9167	0.341786
:c2573470-2573039_hypothetical_protein_c2723_[Escherichia_coli_CFT073]	47.9167	0.341786
:c2979140-2978757_autonomous_glycyl_radical_cofactor_GrcA_[Escherichia_coli_CFT073]	47.9167	0.341786
:c2988531-2987140_alpha-ketoglutarate_transporter_[Escherichia_coli_CFT073]	47.9167	0.341786
:c5127964-5127677_hypothetical_protein_c5381_[Escherichia_coli_CFT073]	47.9167	0.341786
:2154981-2155391_flagellar_protein_FliS_[Escherichia_coli_CFT073]	47.9319	0.342792
:c1333130-1332912_hypothetical_protein_c1407_[Escherichia_coli_CFT073]	47.9452	0.343676
:3770108-3770449_hypothetical_protein_c3949_[Escherichia_coli_CFT073]	47.9532	0.344207
:4953372-4953542_hypothetical_protein_c5198_[Escherichia_coli_CFT073]	47.9532	0.344207
:c4404829-4403435_6-phospho-beta-glucosidase_bglB_[Escherichia_coli_CFT073]	47.957	0.344457
:189576-191093_deoxyguanosinetriphosphate_triphosphohydrolase_[Escherichia_coli_CFT073]	47.9578	0.344514
:719941-720063_hypothetical_protein_c0740_[Escherichia_coli_CFT073]	47.9675	0.345154
:c1264987-1264742_DNA_damage-inducible_protein_I_[Escherichia_coli_CFT073]	47.9675	0.345154
:1193817-1194827_F1C_putative_fimbrial_adhesin_[Escherichia_coli_CFT073]	47.9723	0.345474
:c2019689-2019246_methionine_sulfoxide_reductase_B_[Escherichia_coli_CFT073]	47.973	0.345518
:c4449004-4448165_transcriptional_regulator_HdfR_[Escherichia_coli_CFT073]	47.9762	0.345732
:c1687698-1686634_putative_transcriptional_regulator_YdcI_[Escherichia_coli_CFT073]	47.9812	0.346066
:4289968-4290240_insertion_element_IS1_1/2/3/5/6_protein_insA_[Escherichia_coli_CFT073]	47.9853	0.346341
:3321909-3323348_guanine_deaminase_[Escherichia_coli_CFT073]	47.9861	0.346392
:3608090-3610231_putative_iron_compound_receptor_[Escherichia_coli_CFT073]	47.9925	0.346818
:1611480-1611704_phage_shock_protein_B_[Escherichia_coli_CFT073]	48	0.347315
:2144494-2144718_hypothetical_protein_c2329_[Escherichia_coli_CFT073]	48	0.347315
:c3075457-3075008_LysM_domain/BON_superfamily_protein_[Escherichia_coli_CFT073]	48	0.347315
:c968986-968087_hypothetical_protein_c1007_[Escherichia_coli_CFT073]	48	0.347315
:c4867643-4866942_allulose-6-phosphate_3-epimerase_[Escherichia_coli_CFT073]	48.0057	0.347695
:4568909-4569535_periplasmic_protein_disulfide_isomerase_I_[Escherichia_coli_CFT073]	48.0064	0.34774
:3320557-3322014_putative_purine_permease_ygfO_[Escherichia_coli_CFT073]	48.011	0.348046
:3837253-3838083_hypothetical_protein_c4020_[Escherichia_coli_CFT073]	48.0144	0.348277
:2135601-2136104_Ferritin-like_protein_2_[Escherichia_coli_CFT073]	48.0159	0.348372
:c1155411-1155160_acyl_carrier_protein_[Escherichia_coli_CFT073]	48.0159	0.348372
:c1401721-1401470_hypothetical_protein_c1525_[Escherichia_coli_CFT073]	48.0159	0.348372
:c2377770-2377519_antitoxin_YefM_[Escherichia_coli_CFT073]	48.0159	0.348372
:c3054059-3053277_lambdoid_prophage_Qin_antitermination_protein_Q_[Escherichia_coli_CFT073]	48.0204	0.348676
:3843421-3844305_putative_methyltransferase_[Escherichia_coli_CFT073]	48.0226	0.348821
:1231442-1231897_hypothetical_protein_c1275_[Escherichia_coli_CFT073]	48.0263	0.349068
:5019372-5020031_hypothetical_protein_c5267_[Escherichia_coli_CFT073]	48.0303	0.349334
:c4872150-4871260_DNA-binding_transcriptional_repressor_RpiR_[Escherichia_coli_CFT073]	48.0359	0.349709
:c769670-769467_hypothetical_protein_c0784_[Escherichia_coli_CFT073]	48.0392	0.349929
:c1533595-1532753_formyltetrahydrofolate_deformylase_[Escherichia_coli_CFT073]	48.0427	0.350162
:c5088521-5088060_aspartate_carbamoyltransferase_regulatory_subunit_[Escherichia_coli_CFT073]	48.0519	0.350779
:2330118-2330939_hypothetical_protein_c2490_[Escherichia_coli_CFT073]	48.0535	0.350885
:c3861390-3861133_hypothetical_protein_c4041_[Escherichia_coli_CFT073]	48.062	0.351452
:c1909969-1907867_putative_oxidoreductase_[Escherichia_coli_CFT073]	48.0742	0.352265
:1332454-1332609_hypothetical_protein_c1406_[Escherichia_coli_CFT073]	48.0769	0.352449
:3511126-3511281_hypothetical_protein_c3684_[Escherichia_coli_CFT073]	48.0769	0.352449
:3005080-3006306_hypothetical_protein_c3125_[Escherichia_coli_CFT073]	48.0848	0.352973
:1021633-1021815_hypothetical_protein_c1058_[Escherichia_coli_CFT073]	48.0874	0.353152
:c4238070-4236946_lipopolysaccharide_core_biosynthesis_protein_rfaG_[Escherichia_coli_CFT073]	48.0889	0.35325
:1506800-1507192_putative_transcriptional_regulator_[Escherichia_coli_CFT073]	48.0916	0.353431
:1468083-1468502_DNA_polymerase_V_subunit_UmuD_[Escherichia_coli_CFT073]	48.0952	0.353675
:1929755-1930621_quinate/shikimate_dehydrogenase_[Escherichia_coli_CFT073]	48.0969	0.353785
:c2904053-2901846_SinH-like_protein_[Escherichia_coli_CFT073]	48.0978	0.353848
:1295117-1295353_acyl_carrier_protein_[Escherichia_coli_CFT073]	48.1013	0.354079
:1881554-1881790_hypothetical_protein_c2035_[Escherichia_coli_CFT073]	48.1013	0.354079
:c1333526-1333290_hypothetical_protein_c1409_[Escherichia_coli_CFT073]	48.1013	0.354079
:c5051976-5051740_hypothetical_protein_c5312_[Escherichia_coli_CFT073]	48.1013	0.354079
:4218443-4218706_hypothetical_protein_c4434_[Escherichia_coli_CFT073]	48.1061	0.3544
:4638191-4638454_hypothetical_protein_c4880_[Escherichia_coli_CFT073]	48.1061	0.3544
:c2503960-2503433_hypothetical_protein_c2654_[Escherichia_coli_CFT073]	48.1061	0.3544
:3508458-3509303_hypothetical_protein_c3680_[Escherichia_coli_CFT073]	48.1087	0.35458
:1872052-1872687_endonuclease_III_[Escherichia_coli_CFT073]	48.1132	0.354879
:2192121-2192756_putative_sulfite_oxidase_subunit_YedZ_[Escherichia_coli_CFT073]	48.1132	0.354879
:1344777-1345121_hypothetical_protein_c1434_[Escherichia_coli_CFT073]	48.1159	0.355063
:1344246-1344407_hypothetical_protein_c1432_[Escherichia_coli_CFT073]	48.1481	0.357226
:1421678-1421893_lambdoid_prophage_DLP12_lysis_protein_S_[Escherichia_coli_CFT073]	48.1481	0.357226
:c1886587-1886210_hypothetical_protein_c2040_[Escherichia_coli_CFT073]	48.1481	0.357226
:c3077166-3076762_DNA_binding_protein,_nucleoid-associated_[Escherichia_coli_CFT073]	48.1481	0.357226
:c4139618-4139457_hypothetical_protein_c4353_[Escherichia_coli_CFT073]	48.1481	0.357226
:3895298-3896464_general_secretion_pathway_protein_L_[Escherichia_coli_CFT073]	48.1577	0.357866
:c3200097-3199552_SecY_interacting_protein_Syd_[Escherichia_coli_CFT073]	48.1685	0.358595
:c147417-146899_hypothetical_protein_c0151_[Escherichia_coli_CFT073]	48.1696	0.358666
:899142-899525_biofilm_formation_regulatory_protein_BssR_[Escherichia_coli_CFT073]	48.1771	0.359173
:c3832562-3831600_hypothetical_protein_c4014_[Escherichia_coli_CFT073]	48.1828	0.359556
:c3883060-3882758_50S_ribosomal_protein_L23_[Escherichia_coli_CFT073]	48.1848	0.359694
:1049838-1050416_hypothetical_protein_c1082_[Escherichia_coli_CFT073]	48.1865	0.359809
:c3836911-3836057_tagatose-bisphosphate_aldolase_[Escherichia_coli_CFT073]	48.1871	0.35985
:c736345-735545_glucosamine-6-phosphate_deaminase_[Escherichia_coli_CFT073]	48.1898	0.360027
:805287-806006_protein_pnuC_[Escherichia_coli_CFT073]	48.1944	0.360343
:3808184-3808654_arginine_repressor_[Escherichia_coli_CFT073]	48.1953	0.360403
:c4871207-4870266_D-allose_transporter_subunit_[Escherichia_coli_CFT073]	48.1953	0.360403
:c1273333-1272917_flagella_synthesis_protein_FlgN_[Escherichia_coli_CFT073]	48.2014	0.360815
:c1915430-1915014_cysteine_desufuration_protein_SufE_[Escherichia_coli_CFT073]	48.2014	0.360815
:c2804864-2803608_xanthosine_permease_[Escherichia_coli_CFT073]	48.21	0.361394
:1685021-1685551_cytochrome_b561_[Escherichia_coli_CFT073]	48.2109	0.361455
:c4728015-4727539_anti-RNA_polymerase_sigma_70_factor_[Escherichia_coli_CFT073]	48.218	0.361935
:339511-340773_putative_membrane_spanning_export_protein_[Escherichia_coli_CFT073]	48.2185	0.361968
:842424-843209_hypothetical_protein_c0868_[Escherichia_coli_CFT073]	48.2188	0.361989
:5008448-5008756_RNA-binding_protein_Hfq_[Escherichia_coli_CFT073]	48.2201	0.362072
:c1015106-1014798_hypothetical_protein_c1051_[Escherichia_coli_CFT073]	48.2201	0.362072
:c3614071-3613649_hypothetical_protein_c3779_[Escherichia_coli_CFT073]	48.227	0.362537
:4590652-4591731_oxidoreductase_yihU_[Escherichia_coli_CFT073]	48.2407	0.363469
:c3335795-3335085_thiol:disulfide_interchange_protein_DsbC_[Escherichia_coli_CFT073]	48.2419	0.363549
:3503125-3503580_hypothetical_protein_c3665_[Escherichia_coli_CFT073]	48.2456	0.363799
:3967027-3967254_ferrous_iron_transport_protein_A_[Escherichia_coli_CFT073]	48.2456	0.363799
:1214529-1216499_outer_membrane_heme/hemoglobin_receptor_[Escherichia_coli_CFT073]	48.2496	0.36407
:c1064713-1064198_SOS_cell_division_inhibitor_[Escherichia_coli_CFT073]	48.2558	0.364489
:2863528-2863728_hypothetical_protein_c3000_[Escherichia_coli_CFT073]	48.2587	0.364685
:c4385960-4385760_hypothetical_protein_c4626_[Escherichia_coli_CFT073]	48.2587	0.364685
:c5034637-5034149_hypothetical_protein_c5293_[Escherichia_coli_CFT073]	48.2618	0.364892
:c3452638-3452264_transposase_insC_[Escherichia_coli_CFT073]	48.2667	0.365224
:c2667925-2667464_hypothetical_protein_c2811_[Escherichia_coli_CFT073]	48.2684	0.365342
:5139826-5142462_outer_membrane_usher_protein_fimD_[Escherichia_coli_CFT073]	48.2746	0.365759
:2522283-2522717_hypothetical_protein_c2673_[Escherichia_coli_CFT073]	48.2759	0.365847
:c1588901-1588728_hypothetical_protein_c1755_[Escherichia_coli_CFT073]	48.2759	0.365847
:c3007228-3006881_50S_ribosomal_protein_L19_[Escherichia_coli_CFT073]	48.2759	0.365847
:2159157-2159390_hypothetical_protein_c2345_[Escherichia_coli_CFT073]	48.2906	0.366847
:1368995-1371058_hypothetical_protein_c1468_[Escherichia_coli_CFT073]	48.3043	0.367774
:551322-551675_hypothetical_protein_c0574_[Escherichia_coli_CFT073]	48.3051	0.36783
:c2013201-2012221_oxidoreductase_ydjG_[Escherichia_coli_CFT073]	48.318	0.36871
:c455006-454173_hypothetical_protein_c0464_[Escherichia_coli_CFT073]	48.3213	0.368934
:1535213-1536226_response_regulator_of_RpoS_[Escherichia_coli_CFT073]	48.3235	0.369079
:542925-543491_putative_transcriptional_regulator_YbaO_[Escherichia_coli_CFT073]	48.3245	0.36915
:c1910616-1909990_hypothetical_protein_c2068_[Escherichia_coli_CFT073]	48.3254	0.369207
:152984-153910_ABC_transporter_ATP-binding_protein_[Escherichia_coli_CFT073]	48.3279	0.369383
:1379766-1381052_hypothetical_protein_c1487_[Escherichia_coli_CFT073]	48.3294	0.369485
:1842794-1843573_DNA-binding_transcriptional_regulator_RstA_[Escherichia_coli_CFT073]	48.3333	0.36975
:c4870139-4868607_D-allose_transporter_ATP-binding_protein_[Escherichia_coli_CFT073]	48.3366	0.369972
:c1591034-1589049_RNase_II_stability_modulator_[Escherichia_coli_CFT073]	48.3384	0.370092
:c2038452-2038120_hypothetical_protein_c2206_[Escherichia_coli_CFT073]	48.3483	0.370771
:4731488-4731760_transcriptional_regulator_HU_subunit_alpha_[Escherichia_coli_CFT073]	48.3516	0.370996
:c1745600-1745328_hypothetical_protein_c1910_[Escherichia_coli_CFT073]	48.3516	0.370996
:2187473-2188324_chaperone_protein_HchA_[Escherichia_coli_CFT073]	48.3568	0.371347
:3052649-3052861_cold_shock-like_protein_cspF_[Escherichia_coli_CFT073]	48.3568	0.371347
:5014350-5014775_transcriptional_repressor_NsrR_[Escherichia_coli_CFT073]	48.3568	0.371347
:c3572887-3572462_biopolymer_transport_protein_ExbD_[Escherichia_coli_CFT073]	48.3568	0.371347
:c3379732-3379001_hypothetical_protein_c3523_[Escherichia_coli_CFT073]	48.3607	0.37161
:c3742557-3741673_lipoprotein_NlpI_[Escherichia_coli_CFT073]	48.3616	0.371673
:3621354-3622025_putative_disulfide_oxidoreductase_[Escherichia_coli_CFT073]	48.3631	0.371776
:4342988-4343965_putative_transport_protein_YicL_[Escherichia_coli_CFT073]	48.364	0.371838
:c719875-718898_glutamate_and_aspartate_transporter_subunit_[Escherichia_coli_CFT073]	48.364	0.371838
:c1453911-1453759_hypothetical_protein_c1605_[Escherichia_coli_CFT073]	48.366	0.371975
:c376007-371877_hemoglobin_protease_[Escherichia_coli_CFT073]	48.366	0.371975
:c414000-413296_hypothetical_protein_c0428_[Escherichia_coli_CFT073]	48.3688	0.372164
:2259937-2260887_transcriptional_regulator_Cbl_[Escherichia_coli_CFT073]	48.3701	0.372256
:c1756162-1754627_amino_acid_antiporter_[Escherichia_coli_CFT073]	48.3724	0.37241
:4449123-4449461_hypothetical_protein_c4686_[Escherichia_coli_CFT073]	48.3776	0.372763
:477308-477646_hypothetical_protein_c0491_[Escherichia_coli_CFT073]	48.3776	0.372763
:4602703-4602981_hypothetical_protein_c4839_[Escherichia_coli_CFT073]	48.3871	0.373412
:c980572-980354_translation_initiation_factor_IF-1_[Escherichia_coli_CFT073]	48.4018	0.374418
:c871262-870759_DNA_starvation/stationary_phase_protection_protein_Dps_[Escherichia_coli_CFT073]	48.4127	0.375161
:c5132317-5131337_hypothetical_protein_c5387_[Escherichia_coli_CFT073]	48.42	0.375658
:c4107932-4106535_cytochrome_C_peroxidase_[Escherichia_coli_CFT073]	48.4263	0.376092
:3741630-3741788_hypothetical_protein_c3917_[Escherichia_coli_CFT073]	48.4277	0.376184
:528399-528716_transcriptional_regulator_BolA_[Escherichia_coli_CFT073]	48.4277	0.376184
:1890577-1891404_hypothetical_protein_c2049_[Escherichia_coli_CFT073]	48.43	0.37634
:4136749-4136940_hypothetical_protein_c4349_[Escherichia_coli_CFT073]	48.4375	0.376857
:4304606-4304797_hypothetical_protein_c4520_[Escherichia_coli_CFT073]	48.4375	0.376857
:481024-481215_hypothetical_protein_c0496_[Escherichia_coli_CFT073]	48.4375	0.376857
:c3674539-3674123_hypothetical_protein_c3840_[Escherichia_coli_CFT073]	48.4412	0.377113
:c2430275-2429634_uridine_kinase_[Escherichia_coli_CFT073]	48.4424	0.37719
:c3598141-3597692_hypothetical_protein_c3763_[Escherichia_coli_CFT073]	48.4444	0.377332
:2261008-2262648_hypothetical_protein_c2448_[Escherichia_coli_CFT073]	48.4461	0.377443
:3580272-3580529_putative_outer_membrane_lipoprotein_[Escherichia_coli_CFT073]	48.4496	0.377686
:c2416425-2415877_putative_colanic_acid_biosynthesis_acetyltransferase_WcaF_[Escherichia_coli_CFT073]	48.4517	0.377831
:c288717-288427_hypothetical_protein_c0316_[Escherichia_coli_CFT073]	48.4536	0.377959
:c3179884-3179594_hypothetical_protein_c3339_[Escherichia_coli_CFT073]	48.4536	0.377959
:c4357277-4356987_acetolactate_synthase_1_regulatory_subunit_[Escherichia_coli_CFT073]	48.4536	0.377959
:155286-156515_hypothetical_protein_c0159_[Escherichia_coli_CFT073]	48.4553	0.378074
:c870355-869609_glutamine_ABC_transporter_periplasmic_protein_[Escherichia_coli_CFT073]	48.4605	0.378432
:c3908807-3907995_FKBP-type_peptidyl-prolyl_cis-trans_isomerase_[Escherichia_coli_CFT073]	48.4625	0.378568
:157173-158117_hypothetical_protein_c0162_[Escherichia_coli_CFT073]	48.4656	0.378782
:c4285697-4284198_putative_amino_acid_antiporter_[Escherichia_coli_CFT073]	48.4667	0.378854
:2524573-2525292_hypothetical_protein_c2677_[Escherichia_coli_CFT073]	48.4722	0.379235
:c3862205-3861387_shikimate_5-dehydrogenase_[Escherichia_coli_CFT073]	48.4737	0.37934
:1381049-1381279_hypothetical_protein_c1488_[Escherichia_coli_CFT073]	48.4848	0.380101
:3508176-3508373_hypothetical_protein_c3679_[Escherichia_coli_CFT073]	48.4848	0.380101
:5012546-5012743_hypothetical_protein_c5260_[Escherichia_coli_CFT073]	48.4848	0.380101
:c1074456-1074127_sulfur_transfer_protein_TusE_[Escherichia_coli_CFT073]	48.4848	0.380101
:c1975058-1973700_PTS_system_N,N'-diacetylchitobiose-specific_transporter_subunit_IIC_[Escherichia_coli_CFT073]	48.4915	0.38056
:c1453849-1453118_putative_transcriptional_regulator_YcgE_[Escherichia_coli_CFT073]	48.4973	0.380953
:285387-285986_hypothetical_protein_c0309_[Escherichia_coli_CFT073]	48.5	0.381141
:4465820-4466254_thioredoxin_[Escherichia_coli_CFT073]	48.5057	0.381536
:1578166-1579140_transcriptional_regulator_CysB_[Escherichia_coli_CFT073]	48.5128	0.382022
:4172612-4173790_xylose_operon_regulatory_protein_[Escherichia_coli_CFT073]	48.5157	0.382219
:4585831-4586541_putative_transcriptional_regulator_YihL_[Escherichia_coli_CFT073]	48.5232	0.382736
:5225297-5225770_hypothetical_protein_c5484_[Escherichia_coli_CFT073]	48.5232	0.382736
:3271486-3271689_hypothetical_protein_c3421_[Escherichia_coli_CFT073]	48.5294	0.383162
:c2846635-2846228_ethanolamine_utilization_protein_EutS_[Escherichia_coli_CFT073]	48.5294	0.383162
:4567906-4568892_serine/threonine_protein_kinase_[Escherichia_coli_CFT073]	48.5309	0.383265
:1529994-1531118_hypothetical_protein_c1694_[Escherichia_coli_CFT073]	48.5333	0.383432
:1387752-1388093_hypothetical_protein_c1503_[Escherichia_coli_CFT073]	48.538	0.383754
:3084039-3084998_ribonucleotide-diphosphate_reductase_subunit_beta_[Escherichia_coli_CFT073]	48.5417	0.384006
:c2978056-2977130_putative_transcriptional_regulator_YfiE_[Escherichia_coli_CFT073]	48.5437	0.384145
:c1635151-1634219_hypothetical_protein_c1801_[Escherichia_coli_CFT073]	48.5531	0.38479
:c5092765-5091761_ornithine_carbamoyltransferase_[Escherichia_coli_CFT073]	48.5572	0.385076
:2176740-2176982_hypothetical_protein_c2372_[Escherichia_coli_CFT073]	48.5597	0.385245
:287365-287607_hypothetical_protein_c0312_[Escherichia_coli_CFT073]	48.5597	0.385245
:1636492-1638126_periplasmic_murein_peptide-binding_protein_[Escherichia_coli_CFT073]	48.5627	0.385453
:2036655-2037146_hypothetical_protein_c2203_[Escherichia_coli_CFT073]	48.5772	0.386456
:3406498-3407763_prophage_P4_integrase_[Escherichia_coli_CFT073]	48.5782	0.386522
:3111517-3112290_DNA-binding_transcriptional_repressor_SrlR_[Escherichia_coli_CFT073]	48.5788	0.386564
:482714-482995_hypothetical_protein_c0501_[Escherichia_coli_CFT073]	48.5816	0.386754
:c3552080-3551517_hypothetical_protein_c3718_[Escherichia_coli_CFT073]	48.5816	0.386754
:1624577-1625533_outer_membrane_protein_G_[Escherichia_coli_CFT073]	48.5893	0.387291
:c4243563-4242889_DNA_repair_protein_RadC_[Escherichia_coli_CFT073]	48.5926	0.387515
:1260252-1261358_hypothetical_protein_c1321_[Escherichia_coli_CFT073]	48.5998	0.388014
:c1450150-1449293_SitA_protein_[Escherichia_coli_CFT073]	48.6014	0.388123
:c1684832-1683831_glyceraldehyde_3-phosphate_dehydrogenase_A_[Escherichia_coli_CFT073]	48.6028	0.388219
:c307199-305943_PTS_system_ascorbate-specific_transporter_subunit_IIC_[Escherichia_coli_CFT073]	48.6078	0.388565
:c2037182-2036823_hypothetical_protein_c2204_[Escherichia_coli_CFT073]	48.6111	0.388794
:c2466363-2465101_putative_tagatose_6-phosphate_kinase_gatZ_[Escherichia_coli_CFT073]	48.6144	0.389022
:5230718-5231404_putative_RNA_methyltransferase_[Escherichia_coli_CFT073]	48.6172	0.389213
:c3397992-3397666_hypothetical_protein_c3546_[Escherichia_coli_CFT073]	48.6239	0.389674
:3512056-3513075_hypothetical_protein_c3686_[Escherichia_coli_CFT073]	48.6275	0.389923
:c802291-801671_hypothetical_protein_c0820_[Escherichia_coli_CFT073]	48.6312	0.390185
:1424187-1424369_hypothetical_protein_c1567_[Escherichia_coli_CFT073]	48.6339	0.390367
:c3762347-3761871_transcription_elongation_factor_GreA_[Escherichia_coli_CFT073]	48.6373	0.390605
:1938649-1938942_ferredoxin-like_protein_ydiT_[Escherichia_coli_CFT073]	48.6395	0.390753
:3761422-3761715_RNA-binding_protein_YhbY_[Escherichia_coli_CFT073]	48.6395	0.390753
:4979722-4980015_co-chaperonin_GroES_[Escherichia_coli_CFT073]	48.6395	0.390753
:797422-797826_acyl-CoA_thioester_hydrolase_YbgC_[Escherichia_coli_CFT073]	48.642	0.390927
:3879025-3879579_hypothetical_protein_c4074_[Escherichia_coli_CFT073]	48.6486	0.391389
:c7077-6301_hypothetical_protein_c0010_[Escherichia_coli_CFT073]	48.6486	0.391389
:4956962-4958971_regulatory_protein_[Escherichia_coli_CFT073]	48.6567	0.391947
:4776016-4776426_phosphate-starvation-inducible_protein_PsiE_[Escherichia_coli_CFT073]	48.6618	0.392299
:c3604933-3603923_iron_ABC_transporter_substrate-binding_protein_[Escherichia_coli_CFT073]	48.6647	0.392499
:1381945-1382244_hypothetical_protein_c1493_[Escherichia_coli_CFT073]	48.6667	0.392636
:3824394-3824582_hypothetical_protein_c4007_[Escherichia_coli_CFT073]	48.6772	0.39337
:c1406629-1406441_hypothetical_protein_c1533_[Escherichia_coli_CFT073]	48.6772	0.39337
:c1331873-1329432_exodeoxyribonuclease_VIII_[Escherichia_coli_CFT073]	48.6896	0.394226
:c2568772-2568428_hypothetical_protein_c2718_[Escherichia_coli_CFT073]	48.6957	0.394645
:c1319393-1318320_hypothetical_protein_c1390_[Escherichia_coli_CFT073]	48.6965	0.394702
:1127702-1128904_P4_family_integrase_[Escherichia_coli_CFT073]	48.7116	0.395749
:2985416-2986774_phosphatidylserine_synthase_[Escherichia_coli_CFT073]	48.7123	0.3958
:4486067-4486222_hypothetical_protein_c4720_[Escherichia_coli_CFT073]	48.7179	0.396193
:53019-53252_putative_antitoxin_of_gyrase_inhibiting_toxin-antitoxin_system_[Escherichia_coli_CFT073]	48.7179	0.396193
:c1973649-1973299_PTS_system_N,N'-diacetylchitobiose-specific_transporter_subunit_IIA_[Escherichia_coli_CFT073]	48.7179	0.396193
:c4368633-4368205_heat_shock_chaperone_IbpB_[Escherichia_coli_CFT073]	48.7179	0.396193
:c4424713-4424090_16S_rRNA_methyltransferase_GidB_[Escherichia_coli_CFT073]	48.7179	0.396193
:2194512-2195732_P4_family_integrase_[Escherichia_coli_CFT073]	48.7305	0.397068
:3876072-3876623_hypothetical_protein_c4064_[Escherichia_coli_CFT073]	48.7319	0.397161
:4821973-4822686_acid_phosphatase/phosphotransferase_[Escherichia_coli_CFT073]	48.7395	0.39769
:c1955717-1955361_50S_ribosomal_protein_L20_[Escherichia_coli_CFT073]	48.7395	0.39769
:3000445-3001605_bifunctional_chorismate_mutase/prephenate_dehydratase_[Escherichia_coli_CFT073]	48.7511	0.398495
:c2854271-2853669_hypothetical_protein_c2994_[Escherichia_coli_CFT073]	48.7562	0.398853
:c564921-564760_hypothetical_protein_c0585_[Escherichia_coli_CFT073]	48.7654	0.399494
:2745717-2746649_hypothetical_protein_c2892_[Escherichia_coli_CFT073]	48.7674	0.399632
:c2094260-2093328_high-affinity_zinc_transporter_periplasmic_component_[Escherichia_coli_CFT073]	48.7674	0.399632
:c2972912-2972304_RNA_polymerase_sigma_factor_RpoE_[Escherichia_coli_CFT073]	48.7685	0.399705
:c1068136-1067690_hypothetical_protein_c1098_[Escherichia_coli_CFT073]	48.7696	0.399782
:c249608-249162_hypothetical_protein_c0255_[Escherichia_coli_CFT073]	48.7696	0.399782
:c753042-752596_ferric_uptake_regulator_[Escherichia_coli_CFT073]	48.7696	0.399782
:c957117-956386_arginine-binding_periplasmic_protein_1_[Escherichia_coli_CFT073]	48.7705	0.399846
:1552604-1552888_hypothetical_protein_c1714_[Escherichia_coli_CFT073]	48.7719	0.399946
:c753861-753331_flavodoxin_FldA_[Escherichia_coli_CFT073]	48.7759	0.400222
:c761174-758967_ornithine_decarboxylase_[Escherichia_coli_CFT073]	48.7772	0.400311
:2460017-2460916_lipid_kinase_[Escherichia_coli_CFT073]	48.7778	0.400353
:1242377-1243114_putative_hydrolase_[Escherichia_coli_CFT073]	48.7805	0.400542
:3952403-3952525_hypothetical_protein_c4168_[Escherichia_coli_CFT073]	48.7805	0.400542
:518611-519102_putative_nucleotide-binding_protein_[Escherichia_coli_CFT073]	48.7805	0.400542
:c3751639-3751187_hypothetical_protein_c3927_[Escherichia_coli_CFT073]	48.7859	0.400917
:c1088103-1087030_putative_electron_transport_protein_yccM_[Escherichia_coli_CFT073]	48.7896	0.401174
:c4850876-4850133_hypothetical_protein_c5076_[Escherichia_coli_CFT073]	48.7903	0.401227
:3392328-3392618_hypothetical_protein_c3539_[Escherichia_coli_CFT073]	48.7973	0.401709
:4602054-4602344_hypothetical_protein_c4838_[Escherichia_coli_CFT073]	48.7973	0.401709
:c2076645-2076271_hypothetical_protein_c2251_[Escherichia_coli_CFT073]	48.8	0.401901
:2258918-2259835_nitrogen_assimilation_transcriptional_regulator_[Escherichia_coli_CFT073]	48.8017	0.402023
:c4428036-4427578_DNA-binding_transcriptional_regulator_AsnC_[Escherichia_coli_CFT073]	48.8017	0.402023
:4016531-4017163_hypothetical_protein_c4226_[Escherichia_coli_CFT073]	48.8152	0.402959
:c3008616-3008068_16S_rRNA-processing_protein_RimM_[Escherichia_coli_CFT073]	48.816	0.403019
:5087694-5088158_hypothetical_protein_c5343_[Escherichia_coli_CFT073]	48.8172	0.403101
:c3369730-3369221_putative_DNA-binding_transcriptional_regulator_[Escherichia_coli_CFT073]	48.8235	0.403542
:c4400522-4399800_putative_6-phosphogluconolactonase_[Escherichia_coli_CFT073]	48.8243	0.403599
:4159086-4159298_major_cold_shock_protein_[Escherichia_coli_CFT073]	48.8263	0.403735
:c232343-231531_DL-methionine_transporter_substrate-binding_subunit_[Escherichia_coli_CFT073]	48.8315	0.404097
:2691366-2691965_hypothetical_protein_c2832_[Escherichia_coli_CFT073]	48.8333	0.404226
:c1788735-1787317_hypothetical_protein_c1945_[Escherichia_coli_CFT073]	48.8372	0.404497
:c4733020-4732892_hypothetical_protein_c4960_[Escherichia_coli_CFT073]	48.8372	0.404497
:c4289715-4288246_putative_antiporter_[Escherichia_coli_CFT073]	48.8435	0.404939
:4958952-4960208_transport_activator_[Escherichia_coli_CFT073]	48.8465	0.405143
:c355010-354270_hypothetical_protein_c0374_[Escherichia_coli_CFT073]	48.8529	0.405593
:c4977406-4975925_aspartate_ammonia-lyase_[Escherichia_coli_CFT073]	48.8529	0.405593
:1795894-1796112_hypothetical_protein_c1954_[Escherichia_coli_CFT073]	48.8584	0.40598
:23443-23661_hypothetical_protein_c0028_[Escherichia_coli_CFT073]	48.8584	0.40598
:2880002-2882074_polyphosphate_kinase_[Escherichia_coli_CFT073]	48.8664	0.406534
:c4305158-4304850_hypothetical_protein_c4521_[Escherichia_coli_CFT073]	48.8673	0.4066
:c1556170-1555772_acyl-CoA_thioester_hydrolase_[Escherichia_coli_CFT073]	48.8722	0.40694
:c4401739-4400537_hypothetical_protein_c4641_[Escherichia_coli_CFT073]	48.8778	0.407333
:4252430-4253053_guanylate_kinase_[Escherichia_coli_CFT073]	48.8782	0.407361
:2606884-2608722_sensory_histidine_kinase_AtoS_[Escherichia_coli_CFT073]	48.8853	0.407855
:3077833-3078282_hypothetical_protein_c3221_[Escherichia_coli_CFT073]	48.8889	0.408109
:4321940-4322074_hypothetical_protein_c4543_[Escherichia_coli_CFT073]	48.8889	0.408109
:c1381601-1381242_hypothetical_protein_c1489_[Escherichia_coli_CFT073]	48.8889	0.408109
:3725031-3725891_PTS_system_N-acetylgalactosamine-specific_transporter_subunit_IID_[Escherichia_coli_CFT073]	48.8966	0.408651
:822337-823389_hypothetical_protein_c0846_[Escherichia_coli_CFT073]	48.9079	0.409438
:c1950077-1949526_putative_glutathione_peroxidase_[Escherichia_coli_CFT073]	48.913	0.4098
:340972-345804_RTX_family_exoprotein_A_gene_[Escherichia_coli_CFT073]	48.9137	0.409847
:c2708315-2707533_histidine-binding_periplasmic_protein_[Escherichia_coli_CFT073]	48.9144	0.409897
:c1699803-1699573_hypothetical_protein_c1860_[Escherichia_coli_CFT073]	48.9177	0.410129
:c1267554-1266907_glutaredoxin_2_[Escherichia_coli_CFT073]	48.9198	0.41027
:3877382-3877939_hypothetical_protein_c4069_[Escherichia_coli_CFT073]	48.9247	0.410618
:c874951-873368_hypothetical_protein_c0901_[Escherichia_coli_CFT073]	48.9268	0.410761
:752186-752512_lipoprotein_ybfN_[Escherichia_coli_CFT073]	48.9297	0.410964
:c3058954-3058346_hypothetical_protein_c3195_[Escherichia_coli_CFT073]	48.9327	0.411175
:3213754-3214176_fucose_operon_fucU_protein_[Escherichia_coli_CFT073]	48.9362	0.41142
:c1406266-1405985_hypothetical_protein_c1532_[Escherichia_coli_CFT073]	48.9362	0.41142
:c710626-709922_nicotinic_acid_mononucleotide_adenylyltransferase_[Escherichia_coli_CFT073]	48.9362	0.41142
:c855072-854932_hypothetical_protein_c0881_[Escherichia_coli_CFT073]	48.9362	0.41142
:c2790680-2790303_putative_PTS_system_IIB_component_ypdH_[Escherichia_coli_CFT073]	48.9418	0.411815
:c3704397-3703066_threonine/serine_transporter_TdcC_[Escherichia_coli_CFT073]	48.9489	0.412316
:945288-945575_hypothetical_protein_c0983_[Escherichia_coli_CFT073]	48.9583	0.412975
:c698529-698146_camphor_resistance_protein_CrcB_[Escherichia_coli_CFT073]	48.9583	0.412975
:115993-116715_transposase_insK_[Escherichia_coli_CFT073]	48.9627	0.413278
:c226883-226161_transposase_insK_[Escherichia_coli_CFT073]	48.9627	0.413278
:3904978-3905412_hypothetical_protein_c4113_[Escherichia_coli_CFT073]	48.9655	0.413479
:1011216-1011989_putative_metalloprotease_ycaL_[Escherichia_coli_CFT073]	48.9664	0.413541
:c2755766-2748603_yapH-like_protein_[Escherichia_coli_CFT073]	48.9671	0.413587
:c1976101-1975763_DNA-binding_transcriptional_activator_OsmE_[Escherichia_coli_CFT073]	48.9676	0.413621
:154782-155222_putative_PTS_system_IIA_component_yadI_[Escherichia_coli_CFT073]	48.9796	0.414467
:c3400194-3399901_hypothetical_protein_c3549_[Escherichia_coli_CFT073]	48.9796	0.414467
:c4948133-4947546_PapH_protein_[Escherichia_coli_CFT073]	48.9796	0.414467
:c2017459-2016080_metabolite_transporter_[Escherichia_coli_CFT073]	48.9855	0.414882
:4377585-4377782_hypothetical_protein_c4618_[Escherichia_coli_CFT073]	48.9899	0.415191
:c4923121-4922924_hypothetical_protein_c5147_[Escherichia_coli_CFT073]	48.9899	0.415191
:4340940-4341782_hypothetical_protein_c4578_[Escherichia_coli_CFT073]	48.9917	0.415317
:3012668-3013420_hypothetical_protein_c3134_[Escherichia_coli_CFT073]	49.004	0.416181
:c4971387-4970125_prophage_P4_integrase_[Escherichia_coli_CFT073]	49.0103	0.416624
:c1961179-1960421_hypothetical_protein_c2120_[Escherichia_coli_CFT073]	49.0119	0.416734
:254517-254771_hypothetical_protein_c0264_[Escherichia_coli_CFT073]	49.0196	0.417279
:4466395-4466496_putative_rho_operon_leader_peptide_[Escherichia_coli_CFT073]	49.0196	0.417279
:c2017496-2017344_hypothetical_protein_c2180_[Escherichia_coli_CFT073]	49.0196	0.417279
:c309915-309763_hypothetical_protein_c0339_[Escherichia_coli_CFT073]	49.0196	0.417279
:243401-244171_hypothetical_protein_c0247_[Escherichia_coli_CFT073]	49.0272	0.417816
:c3311319-3310549_hypothetical_protein_c3454_[Escherichia_coli_CFT073]	49.0272	0.417816
:c1738841-1737453_nitrite_extrusion_protein_2_[Escherichia_coli_CFT073]	49.0281	0.417875
:c681426-680911_hypothetical_protein_c0693_[Escherichia_coli_CFT073]	49.031	0.418081
:c3646898-3645918_transcriptional_activator_TtdR_[Escherichia_coli_CFT073]	49.0316	0.418123
:1865749-1866213_hypothetical_protein_c2018_[Escherichia_coli_CFT073]	49.0323	0.418169
:c2318214-2317279_hypothetical_protein_c2476_[Escherichia_coli_CFT073]	49.0385	0.418606
:1443968-1445635_hypothetical_protein_c1591_[Escherichia_coli_CFT073]	49.0408	0.418768
:c223972-223712_Rho-binding_antiterminator_[Escherichia_coli_CFT073]	49.0421	0.418865
:2871215-2871685_thioredoxin-dependent_thiol_peroxidase_[Escherichia_coli_CFT073]	49.0446	0.419037
:4135181-4136752_hypothetical_protein_c4348_[Escherichia_coli_CFT073]	49.0458	0.419122
:1987799-1988638_hypothetical_protein_c2152_[Escherichia_coli_CFT073]	49.0476	0.41925
:c3886777-3885308_general_secretion_pathway_protein_A_[Escherichia_coli_CFT073]	49.0476	0.41925
:3776852-3777430_lipopolysaccharide_transport_periplasmic_protein_LptA_[Escherichia_coli_CFT073]	49.0501	0.419424
:1780528-1781475_putative_transcriptional_regulator_YcjZ_[Escherichia_coli_CFT073]	49.0506	0.419462
:2818235-2818603_hypothetical_protein_c2954_[Escherichia_coli_CFT073]	49.0515	0.419523
:1459716-1460243_hypothetical_protein_c1615_[Escherichia_coli_CFT073]	49.053	0.419631
:c4980036-4979719_hypothetical_protein_c5225_[Escherichia_coli_CFT073]	49.0566	0.419883
:3838040-3839050_hypothetical_protein_c4021_[Escherichia_coli_CFT073]	49.0603	0.420146
:5142469-5143002_FimF_protein_[Escherichia_coli_CFT073]	49.0637	0.420381
:c3338043-3337777_hypothetical_protein_c3477_[Escherichia_coli_CFT073]	49.0637	0.420381
:2928003-2928485_hypothetical_protein_c3054_[Escherichia_coli_CFT073]	49.0683	0.420709
:4705330-4706295_biotin--protein_ligase_[Escherichia_coli_CFT073]	49.0683	0.420709
:c2326760-2325471_hypothetical_protein_c2485_[Escherichia_coli_CFT073]	49.0698	0.42081
:535378-535650_transcriptional_regulator_HU_subunit_beta_[Escherichia_coli_CFT073]	49.0842	0.421831
:c3455399-3454962_hypothetical_protein_c3617_[Escherichia_coli_CFT073]	49.0868	0.422008
:c4451037-4450708_hypothetical_protein_c4688_[Escherichia_coli_CFT073]	49.0909	0.422301
:c5024838-5024509_putative_biofilm_stress_and_motility_protein_A_[Escherichia_coli_CFT073]	49.0909	0.422301
:823465-824898_hypothetical_protein_c0847_[Escherichia_coli_CFT073]	49.0934	0.422479
:c3123240-3122467_hypothetical_protein_c3276_[Escherichia_coli_CFT073]	49.0956	0.422632
:c3881902-3881624_30S_ribosomal_protein_S19_[Escherichia_coli_CFT073]	49.1039	0.42322
:c3941966-3941130_DNA_adenine_methylase_[Escherichia_coli_CFT073]	49.1039	0.42322
:c2372057-2370885_D-alanyl-D-alanine_carboxypeptidase_[Escherichia_coli_CFT073]	49.1049	0.423285
:c1658930-1658595_hypothetical_protein_c1824_[Escherichia_coli_CFT073]	49.1071	0.423446
:2021059-2021964_hypothetical_protein_c2185_[Escherichia_coli_CFT073]	49.117	0.424141
:1014789-1015073_integration_host_factor_subunit_beta_[Escherichia_coli_CFT073]	49.1228	0.424551
:2038276-2038446_hypothetical_protein_c2207_[Escherichia_coli_CFT073]	49.1228	0.424551
:c4765896-4764865_putative_transcriptional_regulator_of_sorbose_uptake_and_utilization_genes_[Escherichia_coli_CFT073]	49.1279	0.424911
:5115549-5116700_prophage_P4_integrase_[Escherichia_coli_CFT073]	49.1319	0.425196
:3159791-3160828_alkaline_phosphatase_isozyme_conversion_aminopeptidase_[Escherichia_coli_CFT073]	49.1329	0.425267
:c3607716-3606907_ferric_enterobactin_transport_ATP-binding_protein_fepC_[Escherichia_coli_CFT073]	49.1358	0.425469
:3174381-3175658_hypothetical_protein_c3333_[Escherichia_coli_CFT073]	49.1393	0.425714
:c1650600-1649665_C32_tRNA_thiolase_[Escherichia_coli_CFT073]	49.1453	0.42614
:1385668-1386723_putative_capsid_protein_of_prophage_[Escherichia_coli_CFT073]	49.1477	0.426311
:c3436895-3436308_PapH_protein_[Escherichia_coli_CFT073]	49.1497	0.426448
:2345772-2346125_hypothetical_protein_c2510_[Escherichia_coli_CFT073]	49.1525	0.426651
:c3276298-3275768_dinucleoside_polyphosphate_hydrolase_[Escherichia_coli_CFT073]	49.1525	0.426651
:5097293-5097709_hypothetical_protein_c5354_[Escherichia_coli_CFT073]	49.1607	0.427226
:1252817-1254370_glucan_biosynthesis_protein_G_[Escherichia_coli_CFT073]	49.1634	0.427422
:c5042699-5041923_hypothetical_protein_c5301_[Escherichia_coli_CFT073]	49.1634	0.427422
:3630573-3630932_hypothetical_protein_c3796_[Escherichia_coli_CFT073]	49.1667	0.42765
:c168281-167802_2-amino-4-hydroxy-6-hydroxymethyldihyropteridine_pyrophosphokinase_[Escherichia_coli_CFT073]	49.1667	0.42765
:c4631872-4631273_hypothetical_protein_c4872_[Escherichia_coli_CFT073]	49.1667	0.42765
:c3410474-3409389_hypothetical_protein_c3559_[Escherichia_coli_CFT073]	49.1713	0.427975
:4975907-4977358_hypothetical_protein_c5221_[Escherichia_coli_CFT073]	49.1736	0.428137
:212043-212591_(3R)-hydroxymyristoyl-ACP_dehydratase_[Escherichia_coli_CFT073]	49.1803	0.428616
:c242282-241368_putative_transcriptional_regulator_YafC_[Escherichia_coli_CFT073]	49.1803	0.428616
:c3099536-3099108_hypothetical_protein_c3246_[Escherichia_coli_CFT073]	49.1841	0.428886
:c435986-435312_hypothetical_protein_c0448_[Escherichia_coli_CFT073]	49.1852	0.428959
:4093148-4093948_hemin_importer_ATP-binding_subunit_[Escherichia_coli_CFT073]	49.1885	0.429195
:4144958-4145329_hypothetical_protein_c4359_[Escherichia_coli_CFT073]	49.1935	0.429551
:1795024-1795458_DNA-binding_transcriptional_repressor_MarR_[Escherichia_coli_CFT073]	49.1954	0.429682
:2088329-2089198_DNA-binding_transcriptional_regulator_HexR_[Escherichia_coli_CFT073]	49.1954	0.429682
:c5189179-5188682_hypothetical_protein_c5439_[Escherichia_coli_CFT073]	49.1968	0.42978
:c4856003-4854435_hypothetical_protein_c5081_[Escherichia_coli_CFT073]	49.2033	0.430242
:1305368-1305745_purine_nucleoside_phosphoramidase_[Escherichia_coli_CFT073]	49.2063	0.430457
:1371747-1371872_hypothetical_protein_c1473_[Escherichia_coli_CFT073]	49.2063	0.430457
:2608719-2610104_acetoacetate_metabolism_regulatory_protein_AtoC_[Escherichia_coli_CFT073]	49.2063	0.430457
:4311760-4312011_hypothetical_protein_c4532_[Escherichia_coli_CFT073]	49.2063	0.430457
:628118-628243_hypothetical_protein_c0650_[Escherichia_coli_CFT073]	49.2063	0.430457
:c3771969-3771403_hypothetical_protein_c3953_[Escherichia_coli_CFT073]	49.2063	0.430457
:c4916928-4915594_lysine/cadaverine_antiporter_[Escherichia_coli_CFT073]	49.2135	0.430962
:c2185271-2184888_hypothetical_protein_c2382_[Escherichia_coli_CFT073]	49.2188	0.431335
:c1508964-1508002_hypothetical_protein_c1673_[Escherichia_coli_CFT073]	49.2212	0.431507
:3175685-3177163_putative_sugar_kinase_ygcE_[Escherichia_coli_CFT073]	49.2224	0.431597
:c2127296-2126718_transcriptional_activator_FlhC_[Escherichia_coli_CFT073]	49.2228	0.431622
:c1155680-1155423_putative_acyl_carrier_protein_[Escherichia_coli_CFT073]	49.2248	0.431764
:781502-781891_succinate_dehydrogenase_cytochrome_b556_large_membrane_subunit_[Escherichia_coli_CFT073]	49.2308	0.432186
:1557866-1558582_outer_membrane_protein_W_[Escherichia_coli_CFT073]	49.2329	0.432338
:1290293-1290814_hypothetical_protein_c1358_[Escherichia_coli_CFT073]	49.2337	0.432395
:c3945117-3944596_shikimate_kinase_I_[Escherichia_coli_CFT073]	49.2337	0.432395
:3200165-3201013_7-cyano-7-deazaguanine_reductase_[Escherichia_coli_CFT073]	49.2344	0.432443
:4730711-4731301_hypothetical_protein_c4956_[Escherichia_coli_CFT073]	49.2386	0.43274
:1343053-1343184_hypothetical_protein_c1428_[Escherichia_coli_CFT073]	49.2424	0.433012
:2295405-2295536_hypothetical_protein_c2462_[Escherichia_coli_CFT073]	49.2424	0.433012
:4453241-4453504_acetolactate_synthase_2_regulatory_subunit_[Escherichia_coli_CFT073]	49.2424	0.433012
:c4068599-4068468_hypothetical_protein_c4288_[Escherichia_coli_CFT073]	49.2424	0.433012
:c4566924-4566397_molybdopterin-guanine_dinucleotide_biosynthesis_protein_B_[Escherichia_coli_CFT073]	49.2424	0.433012
:c4988493-4988098_fumarate_reductase_subunit_C_[Escherichia_coli_CFT073]	49.2424	0.433012
:4629396-4630343_CDP-diacylglycerol_pyrophosphatase_[Escherichia_coli_CFT073]	49.2616	0.434372
:3881259-3881666_hypothetical_protein_c4081_[Escherichia_coli_CFT073]	49.2647	0.434592
:3149034-3149585_hypothetical_protein_c3304_[Escherichia_coli_CFT073]	49.2754	0.435348
:c1503442-1502753_outer_membrane_lipoprotein_LolB_[Escherichia_coli_CFT073]	49.2754	0.435348
:c4550673-4550185_transcriptional_activator_RfaH_[Escherichia_coli_CFT073]	49.2843	0.435978
:3108301-3108864_PTS_system,_glucitol/sorbitol-specific_IIC2_component_[Escherichia_coli_CFT073]	49.2908	0.436441
:3085355-3086557_glycine_betaine_transporter_ATP-binding_subunit_[Escherichia_coli_CFT073]	49.2934	0.43663
:286738-287163_hypothetical_protein_c0311_[Escherichia_coli_CFT073]	49.2958	0.436796
:2643457-2644383_hypothetical_protein_c2786_[Escherichia_coli_CFT073]	49.2988	0.437012
:2026188-2027471_hypothetical_protein_c2189_[Escherichia_coli_CFT073]	49.2991	0.43703
:627789-628145_tail_fiber_assembly_protein_[Escherichia_coli_CFT073]	49.2997	0.437076
:c1447564-1446707_SitD_protein_[Escherichia_coli_CFT073]	49.3007	0.437146
:c2149830-2148973_cystine_transporter_subunit_[Escherichia_coli_CFT073]	49.3007	0.437146
:c2709606-2709463_hypothetical_protein_c2854_[Escherichia_coli_CFT073]	49.3056	0.43749
:c4906929-4906210_DNA-binding_transcriptional_activator_DcuR_[Escherichia_coli_CFT073]	49.3056	0.43749
:1602137-1603300_membrane_transporter_[Escherichia_coli_CFT073]	49.3127	0.437999
:3892402-3892839_putative_general_secretion_pathway_protein_G_[Escherichia_coli_CFT073]	49.3151	0.438166
:1610758-1611426_phage_shock_protein_PspA_[Escherichia_coli_CFT073]	49.3274	0.439038
:c1557587-1556844_hypothetical_protein_c1721_[Escherichia_coli_CFT073]	49.328	0.439081
:1208210-1208509_hypothetical_protein_c1255_[Escherichia_coli_CFT073]	49.3333	0.439463
:c4014995-4012896_hypothetical_protein_c4223_[Escherichia_coli_CFT073]	49.3333	0.439463
:c4081812-4081663_hypothetical_protein_c4300_[Escherichia_coli_CFT073]	49.3333	0.439463
:2094339-2095094_high-affinity_zinc_transporter_ATPase_[Escherichia_coli_CFT073]	49.3386	0.439839
:5137789-5138394_Type-1_fimbrial_protein,_A_chain_[Escherichia_coli_CFT073]	49.3399	0.439932
:c4894156-4892483_putative_cell_division_protein_[Escherichia_coli_CFT073]	49.3429	0.440143
:3905482-3905943_hypothetical_protein_c4115_[Escherichia_coli_CFT073]	49.3506	0.440694
:913190-913420_hypothetical_protein_c0937_[Escherichia_coli_CFT073]	49.3506	0.440694
:c4442360-4441668_putative_transcriptional_regulator_YieP_[Escherichia_coli_CFT073]	49.3506	0.440694
:2659274-2659660_hypothetical_protein_c2801_[Escherichia_coli_CFT073]	49.354	0.440933
:c1169947-1169792_hypothetical_protein_c1216_[Escherichia_coli_CFT073]	49.359	0.441286
:720260-722137_hypothetical_protein_c0741_[Escherichia_coli_CFT073]	49.361	0.441431
:5150483-5150875_DNA_replication/recombination/repair_protein_[Escherichia_coli_CFT073]	49.3639	0.441634
:4468080-4469183_undecaprenyl-phosphate_alpha-N-acetylglucosaminyltransferase_[Escherichia_coli_CFT073]	49.3659	0.441781
:c5180380-5179907_hypothetical_protein_c5432_[Escherichia_coli_CFT073]	49.3671	0.441863
:114871-115269_nucleoside_triphosphate_pyrophosphohydrolase_[Escherichia_coli_CFT073]	49.3734	0.442314
:c2462917-2461877_galactitol-1-phosphate_dehydrogenase_[Escherichia_coli_CFT073]	49.3756	0.442468
:4696043-4697887_vitamin_B12/cobalamin_outer_membrane_transporter_[Escherichia_coli_CFT073]	49.3767	0.442546
:3410473-3410877_hypothetical_protein_c3560_[Escherichia_coli_CFT073]	49.3827	0.442975
:c3442066-3441905_hypothetical_protein_c3598_[Escherichia_coli_CFT073]	49.3827	0.442975
:692768-694486_sensor_kinase_dpiB_[Escherichia_coli_CFT073]	49.3892	0.443434
:1340628-1341449_cryptic_prophage_antitermination_protein_Q_[Escherichia_coli_CFT073]	49.3917	0.443616
:246421-247161_hypothetical_protein_c0250_[Escherichia_coli_CFT073]	49.3927	0.443686
:1586948-1587277_translation_initiation_factor_Sui1_[Escherichia_coli_CFT073]	49.3939	0.443773
:3893314-3893730_general_secretion_pathway_protein_I_[Escherichia_coli_CFT073]	49.4005	0.444239
:1269062-1269646_ribosomal-protein-S5-alanine_N-acetyltransferase_[Escherichia_coli_CFT073]	49.4017	0.444326
:2760235-2761572_permease_DsdX_[Escherichia_coli_CFT073]	49.4021	0.444353
:c1958538-1956610_threonyl-tRNA_synthetase_[Escherichia_coli_CFT073]	49.4038	0.444478
:3180532-3180699_hypothetical_protein_c3341_[Escherichia_coli_CFT073]	49.4048	0.444543
:c5029777-5029442_hypothetical_protein_c5282_[Escherichia_coli_CFT073]	49.4048	0.444543
:2591392-2591901_ecotin_[Escherichia_coli_CFT073]	49.4118	0.445042
:c5151264-5150923_hypothetical_protein_c5406_[Escherichia_coli_CFT073]	49.4152	0.445287
:c1812089-1810629_oxidoreductase_ydfI_[Escherichia_coli_CFT073]	49.4182	0.445501
:4174872-4175045_hypothetical_protein_c4391_[Escherichia_coli_CFT073]	49.4253	0.446005
:4336244-4337026_hypothetical_protein_c4568_[Escherichia_coli_CFT073]	49.4253	0.446005
:3327501-3329078_putative_purine_permease_ygfU_[Escherichia_coli_CFT073]	49.4297	0.446316
:4631973-4632413_hypothetical_protein_c4873_[Escherichia_coli_CFT073]	49.4331	0.446562
:4522574-4524082_PTS_system,_glucose-specific_IIBC_component_[Escherichia_coli_CFT073]	49.4367	0.446819
:1297593-1297772_hypothetical_protein_c1367_[Escherichia_coli_CFT073]	49.4444	0.44737
:1611704-1612063_DNA-binding_transcriptional_activator_PspC_[Escherichia_coli_CFT073]	49.4444	0.44737
:2887290-2887829_hypothetical_protein_c3025_[Escherichia_coli_CFT073]	49.4444	0.44737
:c3958567-3956843_hypothetical_protein_c4173_[Escherichia_coli_CFT073]	49.4493	0.447714
:3237477-3237749_hypothetical_protein_c3396_[Escherichia_coli_CFT073]	49.4505	0.447805
:3781459-3781731_phosphohistidinoprotein-hexose_phosphotransferase_component_of_N-regulated_PTS_system_(Npr)_[Escherichia_coli_CFT073]	49.4505	0.447805
:1039960-1040145_hypothetical_protein_c1074_[Escherichia_coli_CFT073]	49.4624	0.448647
:156867-157052_hypothetical_protein_c0161_[Escherichia_coli_CFT073]	49.4624	0.448647
:c1948699-1948235_lipoprotein_NlpC_[Escherichia_coli_CFT073]	49.4624	0.448647
:c3101612-3101427_carbon_storage_regulator_[Escherichia_coli_CFT073]	49.4624	0.448647
:c4775801-4775523_hypothetical_protein_c4999_[Escherichia_coli_CFT073]	49.4624	0.448647
:4955658-4956965_regulatory_protein_[Escherichia_coli_CFT073]	49.4648	0.448823
:c1588639-1587890_putative_transcriptional_regulator_YciT_[Escherichia_coli_CFT073]	49.4667	0.448954
:912649-913212_hypothetical_protein_c0936_[Escherichia_coli_CFT073]	49.4681	0.449055
:1305748-1306125_hypothetical_protein_c1377_[Escherichia_coli_CFT073]	49.4709	0.449256
:5201019-5201210_hypothetical_protein_c5459_[Escherichia_coli_CFT073]	49.4792	0.449845
:c5120014-5116943_hypothetical_protein_c5372_[Escherichia_coli_CFT073]	49.4792	0.449845
:c5171118-5168686_putative_restriction_modification_enzyme_R_subunit_[Escherichia_coli_CFT073]	49.4862	0.450349
:c2118265-2117876_chemotaxis_regulatory_protein_CheY_[Escherichia_coli_CFT073]	49.4872	0.450417
:c2712290-2711802_colicin_V_production_protein_[Escherichia_coli_CFT073]	49.4888	0.450529
:1015279-1017543_hypothetical_protein_c1052_[Escherichia_coli_CFT073]	49.4923	0.45078
:c1554792-1554496_YciI-like_protein_[Escherichia_coli_CFT073]	49.4949	0.450971
:1674927-1676318_hypothetical_protein_c1837_[Escherichia_coli_CFT073]	49.4971	0.451126
:c4851637-4850933_ABC_transporter_ATP-binding_protein_[Escherichia_coli_CFT073]	49.5035	0.451584
:4596570-4597514_hypothetical_protein_c4831_[Escherichia_coli_CFT073]	49.5238	0.45303
:927677-928096_hypothetical_protein_c0958_[Escherichia_coli_CFT073]	49.5238	0.45303
:c4613085-4612771_hypothetical_protein_c4850_[Escherichia_coli_CFT073]	49.5238	0.45303
:c4922839-4922315_hypothetical_protein_c5146_[Escherichia_coli_CFT073]	49.5238	0.45303
:3618857-3620653_arylsulfate_sulfotransferase_[Escherichia_coli_CFT073]	49.527	0.453257
:1249795-1251276_hypothetical_protein_c1310_[Escherichia_coli_CFT073]	49.5277	0.453306
:c4274015-4272633_putative_transporter_[Escherichia_coli_CFT073]	49.53	0.453473
:201032-201883_elongation_factor_Ts_[Escherichia_coli_CFT073]	49.5305	0.453509
:2103789-2104214_hypothetical_protein_c2283_[Escherichia_coli_CFT073]	49.5305	0.453509
:c3870506-3870081_zinc-responsive_transcriptional_regulator_[Escherichia_coli_CFT073]	49.5305	0.453509
:c4497122-4495623_hypothetical_protein_c4728_[Escherichia_coli_CFT073]	49.5333	0.45371
:1696911-1697447_hypothetical_protein_c1858_[Escherichia_coli_CFT073]	49.5345	0.45379
:1749589-1750020_osmotically_inducible_protein_C_[Escherichia_coli_CFT073]	49.537	0.453975
:1911623-1913251_pyruvate_kinase_[Escherichia_coli_CFT073]	49.5396	0.454157
:1744165-1744818_formate_dehydrogenase-N_subunit_gamma_[Escherichia_coli_CFT073]	49.5413	0.454278
:c5112288-5111524_gluconate_5-dehydrogenase_[Escherichia_coli_CFT073]	49.5425	0.454364
:501478-501810_preprotein_translocase_subunit_YajC_[Escherichia_coli_CFT073]	49.5495	0.454868
:c3875473-3874142_preprotein_translocase_subunit_SecY_[Escherichia_coli_CFT073]	49.5495	0.454868
:c4427488-4427045_flavodoxin_[Escherichia_coli_CFT073]	49.5495	0.454868
:c4927818-4927036_hypothetical_protein_c5158_[Escherichia_coli_CFT073]	49.553	0.455115
:2255549-2257003_AMP_nucleosidase_[Escherichia_coli_CFT073]	49.5533	0.455134
:1346769-1347329_hypothetical_protein_c1439_[Escherichia_coli_CFT073]	49.5544	0.455212
:4984420-4984986_elongation_factor_P_[Escherichia_coli_CFT073]	49.5591	0.455549
:2555985-2556557_elongation_factor_P_[Escherichia_coli_CFT073]	49.5637	0.455879
:c3131127-3130666_formate_hydrogenlyase_regulatory_protein_HycA_[Escherichia_coli_CFT073]	49.5671	0.456122
:1850547-1852055_hypothetical_protein_c2006_[Escherichia_coli_CFT073]	49.5693	0.456276
:c201778-200849_hypothetical_protein_c0205_[Escherichia_coli_CFT073]	49.5699	0.456322
:c247625-247158_ribonuclease_H_[Escherichia_coli_CFT073]	49.5726	0.456519
:3666829-3668262_putative_transporter_YgjI_[Escherichia_coli_CFT073]	49.5816	0.457157
:1008613-1009701_phosphoserine_aminotransferase_[Escherichia_coli_CFT073]	49.5868	0.457528
:2250680-2252149_hypothetical_protein_c2439_[Escherichia_coli_CFT073]	49.5918	0.45789
:4597634-4598254_phosphatase_[Escherichia_coli_CFT073]	49.5974	0.458289
:c2907909-2907289_hypothetical_protein_c3035_[Escherichia_coli_CFT073]	49.5974	0.458289
:2073442-2073693_hypothetical_protein_c2245_[Escherichia_coli_CFT073]	49.6032	0.4587
:c1170861-1170358_hypothetical_protein_c1218_[Escherichia_coli_CFT073]	49.6032	0.4587
:204938-205699_undecaprenyl_pyrophosphate_synthase_[Escherichia_coli_CFT073]	49.6063	0.458924
:1375240-1376511_peptidase_T_[Escherichia_coli_CFT073]	49.6069	0.458968
:1231915-1232043_hypothetical_protein_c1276_[Escherichia_coli_CFT073]	49.6124	0.45936
:2049996-2050124_hypothetical_protein_c2220_[Escherichia_coli_CFT073]	49.6124	0.45936
:5020579-5021094_hypothetical_protein_c5272_[Escherichia_coli_CFT073]	49.6124	0.45936
:c1951144-1951016_hypothetical_protein_c2108_[Escherichia_coli_CFT073]	49.6124	0.45936
:c2928470-2928084_scaffold_protein_[Escherichia_coli_CFT073]	49.6124	0.45936
:c457478-456705_hypothetical_protein_c0467_[Escherichia_coli_CFT073]	49.6124	0.45936
:c2144035-2143379_response_regulator_[Escherichia_coli_CFT073]	49.6195	0.459867
:c2176952-2176689_hypothetical_protein_c2371_[Escherichia_coli_CFT073]	49.6212	0.45999
:c4252296-4252033_hypothetical_protein_c4472_[Escherichia_coli_CFT073]	49.6212	0.45999
:3307903-3308835_carbamate_kinase_[Escherichia_coli_CFT073]	49.6249	0.460252
:c3544910-3543702_hypothetical_protein_c3711_[Escherichia_coli_CFT073]	49.6278	0.460461
:5138459-5138998_fimbrin-like_protein_fimI_[Escherichia_coli_CFT073]	49.6296	0.460592
:c3878814-3878275_50S_ribosomal_protein_L5_[Escherichia_coli_CFT073]	49.6296	0.460592
:755383-755928_replication_initiation_regulator_SeqA_[Escherichia_coli_CFT073]	49.6337	0.460883
:c4204665-4204255_hypothetical_protein_c4420_[Escherichia_coli_CFT073]	49.635	0.460979
:285015-285155_hemolysin_expression_modulating_protein_[Escherichia_coli_CFT073]	49.6454	0.46172
:4152129-4152692_3-methyl-adenine_DNA_glycosylase_I_[Escherichia_coli_CFT073]	49.6454	0.46172
:680944-681507_alkyl_hydroperoxide_reductase_subunit_C_[Escherichia_coli_CFT073]	49.6454	0.46172
:c1484121-1482130_outer_membrane_receptor_[Escherichia_coli_CFT073]	49.6486	0.461949
:c1772159-1769880_putative_oxidoreductase_[Escherichia_coli_CFT073]	49.6491	0.461987
:c4441645-4440218_putative_transport_protein_YieO_[Escherichia_coli_CFT073]	49.6499	0.46204
:c2130297-2128864_trehalose-6-phosphate_synthase_[Escherichia_coli_CFT073]	49.6513	0.462145
:c2706760-2706044_histidine_transport_system_permease_hisM_[Escherichia_coli_CFT073]	49.6513	0.462145
:4074069-4074503_universal_stress_protein_A_[Escherichia_coli_CFT073]	49.6552	0.46242
:2117045-2117191_hypothetical_protein_c2295_[Escherichia_coli_CFT073]	49.6599	0.462756
:2932363-2933244_hypothetical_protein_c3060_[Escherichia_coli_CFT073]	49.6599	0.462756
:c1824441-1824295_hypothetical_protein_c1980_[Escherichia_coli_CFT073]	49.6599	0.462756
:c280066-279920_hypothetical_protein_c0300_[Escherichia_coli_CFT073]	49.6599	0.462756
:c1401473-1400733_hypothetical_protein_c1524_[Escherichia_coli_CFT073]	49.6626	0.462953
:2155834-2157321_cytoplasmic_alpha-amylase_[Escherichia_coli_CFT073]	49.664	0.46305
:c3217433-3216516_DNA-binding_transcriptional_activator_GcvA_[Escherichia_coli_CFT073]	49.6732	0.46371
:1406629-1406940_hypothetical_protein_c1535_[Escherichia_coli_CFT073]	49.6795	0.46416
:5029455-5029766_PTS_system_L-ascorbate-specific_transporter_subunit_IIB_[Escherichia_coli_CFT073]	49.6795	0.46416
:c3905469-3904999_30S_ribosomal_protein_S7_[Escherichia_coli_CFT073]	49.6815	0.464306
:c4590731-4589784_putative_sugar_kinase_yihV_[Escherichia_coli_CFT073]	49.6835	0.464451
:1101781-1101939_hypothetical_protein_c1141_[Escherichia_coli_CFT073]	49.6855	0.464593
:4618192-4619151_transcriptional_activator_RhaR_[Escherichia_coli_CFT073]	49.6875	0.464734
:c3208555-3207908_L-fuculose_phosphate_aldolase_[Escherichia_coli_CFT073]	49.6914	0.46501
:3189875-3192631_hybrid_sensory_histidine_kinase_BarA_[Escherichia_coli_CFT073]	49.6917	0.465034
:c4406797-4404848_PTS_system_beta-glucoside-specific_transporter_subunits_IIABC_[Escherichia_coli_CFT073]	49.6923	0.465078
:3513147-3514295_KpsE_protein_[Escherichia_coli_CFT073]	49.6954	0.465299
:c1143180-1143016_hypothetical_protein_c1185_[Escherichia_coli_CFT073]	49.697	0.465412
:c521974-521645_cytochrome_o_ubiquinol_oxidase_subunit_IV_[Escherichia_coli_CFT073]	49.697	0.465412
:c3292157-3291321_5-keto-4-deoxyuronate_isomerase_[Escherichia_coli_CFT073]	49.7013	0.465723
:2067863-2069218_hypothetical_protein_c2242_[Escherichia_coli_CFT073]	49.705	0.465988
:3016191-3016532_hypothetical_protein_c3139_[Escherichia_coli_CFT073]	49.7076	0.466174
:2561261-2562817_hypothetical_protein_c2713_[Escherichia_coli_CFT073]	49.711	0.466416
:c268662-268315_hypothetical_protein_c0287_[Escherichia_coli_CFT073]	49.7126	0.466535
:2024141-2026075_hypothetical_protein_c2188_[Escherichia_coli_CFT073]	49.7158	0.466758
:3091317-3091847_transcriptional_repressor_MprA_[Escherichia_coli_CFT073]	49.7175	0.466884
:4593756-4595189_hypothetical_protein_c4829_[Escherichia_coli_CFT073]	49.7211	0.467138
:948013-949269_putrescine_transporter_subunit:_periplasmic-binding_component_of_ABC_superfamily_[Escherichia_coli_CFT073]	49.7216	0.467173
:c3863329-3862787_hypothetical_protein_c4044_[Escherichia_coli_CFT073]	49.7238	0.467331
:c3592810-3592073_1-acyl-sn-glycerol-3-phosphate_acyltransferase_[Escherichia_coli_CFT073]	49.729	0.467706
:5227954-5229306_hypothetical_protein_c5487_[Escherichia_coli_CFT073]	49.7413	0.468589
:2367444-2367638_hypothetical_protein_c2533_[Escherichia_coli_CFT073]	49.7436	0.468752
:c1906487-1905702_PhsC_protein_[Escherichia_coli_CFT073]	49.7455	0.468892
:c1583457-1582867_GTP_cyclohydrolase_II_[Escherichia_coli_CFT073]	49.7462	0.468939
:c3372744-3371356_PTS_system,_mannitol_(Cryptic)-specific_IIBC_component_[Escherichia_coli_CFT073]	49.748	0.469069
:c2529448-2528438_beta-methylgalactoside_transporter_inner_membrane_component_[Escherichia_coli_CFT073]	49.7527	0.469406
:2600455-2603127_phosphotransfer_intermediate_protein_in_two-component_regulatory_system_with_RcsBC_[Escherichia_coli_CFT073]	49.7568	0.469701
:1976303-1977130_NAD_synthetase_[Escherichia_coli_CFT073]	49.7585	0.469817
:2795390-2796631_nucleoside_permease_nupC_[Escherichia_coli_CFT073]	49.7585	0.469817
:2981427-2981846_thioredoxin_2_[Escherichia_coli_CFT073]	49.7619	0.470065
:3917508-3918140_cAMP-regulatory_protein_[Escherichia_coli_CFT073]	49.763	0.470146
:c4284084-4283872_hypothetical_protein_c4499_[Escherichia_coli_CFT073]	49.7653	0.470305
:337318-339465_putative_cytoplasmic_membrane_export_protein_[Escherichia_coli_CFT073]	49.7672	0.470446
:1623501-1624583_ABC_transporter_ATP-binding_protein_[Escherichia_coli_CFT073]	49.7692	0.470585
:1198162-1200339_outer_membrane_receptor_FepA_[Escherichia_coli_CFT073]	49.7704	0.470676
:5034176-5034625_50S_ribosomal_protein_L9_[Escherichia_coli_CFT073]	49.7778	0.471203
:c1803289-1802390_O-acetylserine/cysteine_export_protein_[Escherichia_coli_CFT073]	49.7778	0.471203
:c3485918-3485694_hemolysin_expression_modulating_protein_[Escherichia_coli_CFT073]	49.7778	0.471203
:3894303-3895208_general_secretion_pathway_protein_K_[Escherichia_coli_CFT073]	49.7792	0.471308
:c172035-171331_sugar_fermentation_stimulation_protein_A_[Escherichia_coli_CFT073]	49.7872	0.471881
:c4151977-4151273_hypothetical_protein_c4366_[Escherichia_coli_CFT073]	49.7872	0.471881
:1844942-1845883_DNA_replication_terminus_site-binding_protein_[Escherichia_coli_CFT073]	49.7877	0.471913
:2813300-2814283_cysteine_synthase_A_[Escherichia_coli_CFT073]	49.7967	0.472563
:4628492-4629481_sulfate_transporter_subunit_[Escherichia_coli_CFT073]	49.798	0.472651
:1100241-1100495_hypothetical_protein_c1138_[Escherichia_coli_CFT073]	49.8039	0.473077
:770176-770685_hypothetical_protein_c0786_[Escherichia_coli_CFT073]	49.8039	0.473077
:c4147770-4147261_hypothetical_protein_c4363_[Escherichia_coli_CFT073]	49.8039	0.473077
:c755198-754434_hypothetical_protein_c0773_[Escherichia_coli_CFT073]	49.8039	0.473077
:c4589744-4588956_putative_transcriptional_regulator_YihW_[Escherichia_coli_CFT073]	49.8099	0.473505
:c1463358-1462546_cell_division_inhibitor_MinD_[Escherichia_coli_CFT073]	49.8155	0.473908
:801713-802258_peptidoglycan-associated_outer_membrane_lipoprotein_[Escherichia_coli_CFT073]	49.8168	0.474005
:c1995979-1995707_hypothetical_protein_c2161_[Escherichia_coli_CFT073]	49.8168	0.474005
:c4158201-4157371_hypothetical_protein_c4373_[Escherichia_coli_CFT073]	49.8195	0.474194
:3768402-3768680_DNA-binding_transcriptional_regulator_Nlp_[Escherichia_coli_CFT073]	49.8208	0.474287
:c4149512-4147821_phosphoethanolamine_transferase_[Escherichia_coli_CFT073]	49.8227	0.474424
:1891532-1892113_superoxide_dismutase_[Escherichia_coli_CFT073]	49.8282	0.474817
:3602068-3602649_modulator_of_drug_activity_B_[Escherichia_coli_CFT073]	49.8282	0.474817
:4952414-4952704_transposase_insC_[Escherichia_coli_CFT073]	49.8282	0.474817
:c2082424-2082134_DNA_damage-inducible_protein_YebG_[Escherichia_coli_CFT073]	49.8282	0.474817
:1803484-1804671_putative_MFS-type_transporter_YdeE_[Escherichia_coli_CFT073]	49.8316	0.475066
:c1408384-1408088_putative_host-nuclease_inhibitor_protein_Gam_of_bacteriphage_[Escherichia_coli_CFT073]	49.8316	0.475066
:4181776-4182696_hypothetical_protein_c4398_[Escherichia_coli_CFT073]	49.8371	0.47546
:4670637-4670957_putative_PTS_system_fructose-like_transporter_subunit_EIIB_[Escherichia_coli_CFT073]	49.8442	0.475969
:3866580-3867869_16S_rRNA_methyltransferase_B_[Escherichia_coli_CFT073]	49.845	0.476021
:4439260-4440252_transcriptional_repressor_RbsR_[Escherichia_coli_CFT073]	49.8489	0.476307
:802268-802933_hypothetical_protein_c0822_[Escherichia_coli_CFT073]	49.8498	0.476372
:c3881609-3881277_50S_ribosomal_protein_L22_[Escherichia_coli_CFT073]	49.8498	0.476372
:c1907203-1906484_putative_ferredoxin-like_protein_ydhX_[Escherichia_coli_CFT073]	49.8611	0.47718
:c1209635-1209273_hypothetical_protein_c1257_[Escherichia_coli_CFT073]	49.8623	0.477263
:c1305052-1302863_ferric-rhodotorulic_acid_outer_membrane_transporter_[Escherichia_coli_CFT073]	49.863	0.477317
:c2082079-2081711_hypothetical_protein_c2259_[Escherichia_coli_CFT073]	49.8645	0.477423
:2812354-2813115_putative_sulfate_transport_protein_CysZ_[Escherichia_coli_CFT073]	49.8688	0.47773
:c2963865-2963485_4'-phosphopantetheinyl_transferase_[Escherichia_coli_CFT073]	49.8688	0.47773
:c2061771-2060980_transcriptional_regulator_kdgR_[Escherichia_coli_CFT073]	49.8737	0.478086
:c5076808-5076398_hypothetical_protein_c5334_[Escherichia_coli_CFT073]	49.8783	0.478417
:c1245183-1244350_curli_production_assembly/transport_component_csgG_[Escherichia_coli_CFT073]	49.8801	0.478543
:4062591-4063442_putative_fructose-1,6-bisphosphate_aldolase_[Escherichia_coli_CFT073]	49.8826	0.478725
:c1739995-1739114_hypothetical_protein_c1902_[Escherichia_coli_CFT073]	49.8866	0.479011
:404671-405576_putative_transcriptional_regulator_YkgD_[Escherichia_coli_CFT073]	49.8896	0.479227
:3867891-3869267_potassium_transporter_peripheral_membrane_component_[Escherichia_coli_CFT073]	49.8911	0.47933
[truncated: 3,370 more rows]
